# Supplementary material for: The analysis of voltage collapse induced by nonlinear loads in an arc furnace utilising deep learning-driven TabNet and NODE models
Source: PeerJ journal article supplement (doi:10.7717/peerj-cs.3505), 2026-01-21
Supplement: measurements1.xlsx [file measurements1.xlsx]

## Sheet: Sheet1
I1	I2	I3	P1	P2	P3	Q1	Q2	Q3	V1	V2	V3
-2806.45	899.02	1907.43	0.5	0.5	0.5	0	0	0	-4295.52	-34959.6	39255.1
899.02	794.398	1950.08	0.5	0.5	0.5	0	0	0	-3945.58	-35140.5	39086.1
794.398	689.328	1991.25	0.5	0.5	0.5	0	0	0	-2165.61	-36024.9	38190.5
689.328	583.621	2030.6	0.5	0.5	0.5	0	0	0	-1103.56	-36504.1	37607.6
583.621	477.569	2068.19	0.5	0.5	0.5	0	0	0	302.908	-37130.2	36827.3
477.569	371.338	2103.85	0.5	0.5	0.5	0	0	0	1531.97	-37638.8	36106.9
371.338	265.463	2137.33	0.5	0.5	0.5	0	0	0	2853.56	-38187.6	35334.1
265.463	161.11	2168.04	0.5	0.5	0.5	0	0	0	4168.04	-38769.5	34601.5
161.11	61.1146	2194.54	0.5	0.5	0.5	0	0	0	5607.64	-39559.6	33951.9
61.1146	-29.2062	2214.11	0.5	0.5	0.5	0	0	0	7235.48	-40735.1	33499.6
-29.2062	-109.217	2226.45	0.5	0.5	0.5	0	0	0	8791.89	-41742.5	32950.6
-109.217	-173.704	2211.55	0.5	0.5	0.5	0	0	0	8845.94	-43305.9	34460
-173.704	-225.33	2171.58	0.5	0.5	0.5	0	0	0	9504.94	-44298.5	34793.6
-225.33	-274.76	2129.3	0.5	0.5	0.5	0	0	0	11089.2	-44416.7	33327.5
-274.76	-322.662	2084.53	0.5	0.5	0.5	0	0	0	12136.6	-44816.7	32680.2
-322.662	-369.735	2037.92	0.5	0.5	0.5	0	0	0	13391.5	-44969.9	31578.4
-369.735	-416.195	1989.47	0.5	0.5	0.5	0	0	0	14498.4	-45165.1	30666.7
-416.195	-462.239	1939.38	0.5	0.5	0.5	0	0	0	15639.3	-45272.4	29633.1
-462.239	-507.921	1887.67	0.5	0.5	0.5	0	0	0	16728	-45364.6	28636.6
-507.921	-553.275	1834.38	0.5	0.5	0.5	0	0	0	17809.1	-45410	27601
-553.275	-598.285	1779.54	0.5	0.5	0.5	0	0	0	18861.5	-45427	26565.5
-598.285	-662.998	1761.15	0.5	0.5	0.5	0	0	0	21732.8	-43352.7	21619.9
-662.998	-746.406	1777.42	0.5	0.5	0.5	0	0	0	23673.8	-42261.5	18587.7
-746.406	-828.567	1790.58	0.5	0.5	0.5	0	0	0	24196.9	-42685.2	18488.3
-828.567	-910.069	1801.77	0.5	0.5	0.5	0	0	0	25399.4	-42291.5	16892.1
-910.069	-990.492	1810.37	0.5	0.5	0.5	0	0	0	26245.4	-42241.1	15995.7
-990.492	-1069.92	1816.64	0.5	0.5	0.5	0	0	0	27244.9	-41955.8	14710.9
-1069.92	-1148.17	1820.4	0.5	0.5	0.5	0	0	0	28145.1	-41723.1	13578
-1148.17	-1225.21	1821.69	0.5	0.5	0.5	0	0	0	29069.3	-41399.6	12330.3
-1225.21	-1300.93	1820.44	0.5	0.5	0.5	0	0	0	29955.6	-41056.7	11101.1
-1300.93	-1375.24	1816.65	0.5	0.5	0.5	0	0	0	30833.6	-40659.3	9825.69
-1375.24	-1434.53	1785.4	0.5	0.5	0.5	0	0	0	30521	-41608.8	11087.8
-1434.53	-1478.95	1728.23	0.5	0.5	0.5	0	0	0	30846.9	-41870.5	11023.6
-1478.95	-1520.77	1670.86	0.5	0.5	0.5	0	0	0	32208	-41136.8	8928.76
-1520.77	-1557.38	1614.45	0.5	0.5	0.5	0	0	0	33435	-41062.2	7627.16
-1557.38	-1585.49	1562.57	0.5	0.5	0.5	0	0	0	35384.8	-40970.2	5585.41
-1585.49	-1604.74	1515.18	0.5	0.5	0.5	0	0	0	36998.6	-40870.9	3872.32
-1604.74	-1618.37	1469.32	0.5	0.5	0.5	0	0	0	38097.4	-40396.1	2298.74
-1618.37	-1628.34	1423.04	0.5	0.5	0.5	0	0	0	38994.4	-39845.6	851.122
-1628.34	-1635.54	1375.47	0.5	0.5	0.5	0	0	0	39763.4	-39189.9	-573.512
-1635.54	-1640.42	1326.16	0.5	0.5	0.5	0	0	0	40458.4	-38491.9	-1966.43
-1640.42	-1656.32	1281.71	0.5	0.5	0.5	0	0	0	40453.4	-36401.1	-4052.28
-1656.32	-1682.79	1241.62	0.5	0.5	0.5	0	0	0	40711.4	-34934.6	-5776.84
-1682.79	-1706.9	1199.03	0.5	0.5	0.5	0	0	0	41412.6	-34446.7	-6965.86
-1706.9	-1729.06	1154.13	0.5	0.5	0.5	0	0	0	41837.1	-33420	-8417.17
-1729.06	-1749.03	1106.83	0.5	0.5	0.5	0	0	0	42343.4	-32611	-9732.45
-1749.03	-1766.87	1057.19	0.5	0.5	0.5	0	0	0	42753.7	-31645.8	-11107.9
-1766.87	-1782.48	1005.23	0.5	0.5	0.5	0	0	0	43155.2	-30711.9	-12443.4
-1782.48	-1795.86	950.987	0.5	0.5	0.5	0	0	0	43503.2	-29717.4	-13785.9
-1795.86	-1806.93	894.498	0.5	0.5	0.5	0	0	0	43818.4	-28709.3	-15109.1
-1806.93	-1815.66	835.811	0.5	0.5	0.5	0	0	0	44088.7	-27665.6	-16423.2
-1815.66	-1822.02	774.976	0.5	0.5	0.5	0	0	0	44318.8	-26598.6	-17720.2
-1822.02	-1833.04	715.667	0.5	0.5	0.5	0	0	0	44149.5	-24777.9	-19371.6
-1833.04	-1848.38	657.767	0.5	0.5	0.5	0	0	0	44110.7	-23290.4	-20820.4
-1848.38	-1860.97	597.752	0.5	0.5	0.5	0	0	0	44295.4	-22326	-21969.4
-1860.97	-1871	535.812	0.5	0.5	0.5	0	0	0	44299.8	-21062	-23237.8
-1871	-1878.35	471.968	0.5	0.5	0.5	0	0	0	44323.6	-19908.5	-24415.1
-1878.35	-1883.06	406.351	0.5	0.5	0.5	0	0	0	44268.1	-18662.9	-25605.2
-1883.06	-1885.1	339.082	0.5	0.5	0.5	0	0	0	44183.3	-17426	-26757.3
-1885.1	-1884.53	270.371	0.5	0.5	0.5	0	0	0	44047.4	-16146.4	-27901.1
-1884.53	-1881.47	200.552	0.5	0.5	0.5	0	0	0	43877.7	-14844.5	-29033.2
-1881.47	-1876.17	130.219	0.5	0.5	0.5	0	0	0	43678.3	-13498.2	-30180
-1876.17	-1874.66	61.9744	0.5	0.5	0.5	0	0	0	43062.3	-11529.1	-31533.3
-1874.66	-1876.78	-4.00393	0.5	0.5	0.5	0	0	0	42590.5	-9832.22	-32758.3
-1876.78	-1876.76	-69.6807	0.5	0.5	0.5	0	0	0	42360.4	-8572.97	-33787.4
-1876.76	-1874.53	-135.398	0.5	0.5	0.5	0	0	0	41915.8	-7100.91	-34814.9
-1874.53	-1869.66	-201.724	0.5	0.5	0.5	0	0	0	41477	-5749.03	-35728
-1869.66	-1862.02	-268.88	0.5	0.5	0.5	0	0	0	40950.5	-4338.87	-36611.6
-1862.02	-1851.51	-336.967	0.5	0.5	0.5	0	0	0	40391.3	-2953.48	-37437.8
-1851.51	-1838.1	-405.989	0.5	0.5	0.5	0	0	0	39777.7	-1549.99	-38227.7
-1838.1	-1821.75	-475.913	0.5	0.5	0.5	0	0	0	39124.1	-150.097	-38974
-1821.75	-1802.48	-546.677	0.5	0.5	0.5	0	0	0	38426.2	1255.35	-39681.6
-1802.48	-1774	-612.391	0.5	0.5	0.5	0	0	0	38928.8	2015.61	-40944.5
-1774	-1736.61	-673.23	0.5	0.5	0.5	0	0	0	38782.3	3091.3	-41873.6
-1736.61	-1696.57	-734.909	0.5	0.5	0.5	0	0	0	37658.1	4649.95	-42308.1
-1696.57	-1653.7	-797.182	0.5	0.5	0.5	0	0	0	36969.6	5958.47	-42928
-1653.7	-1608.16	-860.048	0.5	0.5	0.5	0	0	0	36019.7	7377.54	-43397.2
-1608.16	-1559.92	-923.381	0.5	0.5	0.5	0	0	0	35154.9	8725.85	-43880.8
-1559.92	-1509.07	-987.114	0.5	0.5	0.5	0	0	0	34205.6	10090.7	-44296.3
-1509.07	-1455.64	-1051.15	0.5	0.5	0.5	0	0	0	33257.3	11426.4	-44683.7
-1455.64	-1399.69	-1115.4	0.5	0.5	0.5	0	0	0	32269.4	12753.2	-45022.6
-1399.69	-1341.27	-1179.78	0.5	0.5	0.5	0	0	0	31263.4	14058.7	-45322.1
-1341.27	-1277.88	-1238.32	0.5	0.5	0.5	0	0	0	27723.5	15084.5	-42808.1
-1277.88	-1209.72	-1290	0.5	0.5	0.5	0	0	0	25485.1	16219.4	-41704.5
-1209.72	-1139.37	-1341.24	0.5	0.5	0.5	0	0	0	25051.8	17528.3	-42580
-1139.37	-1066.8	-1392.66	0.5	0.5	0.5	0	0	0	23616.9	18713.5	-42330.5
-1066.8	-992.134	-1443.75	0.5	0.5	0.5	0	0	0	22670.9	19923.6	-42594.5
-992.134	-915.423	-1494.63	0.5	0.5	0.5	0	0	0	21425.9	21081.9	-42507.8
-915.423	-836.755	-1545.06	0.5	0.5	0.5	0	0	0	20301.2	22225.6	-42526.7
-836.755	-756.204	-1595.01	0.5	0.5	0.5	0	0	0	19077.4	23334.5	-42412
-756.204	-673.86	-1644.34	0.5	0.5	0.5	0	0	0	17872.2	24418.1	-42290.3
-673.86	-589.817	-1692.96	0.5	0.5	0.5	0	0	0	16626.1	25471.2	-42097.3
-589.817	-506.109	-1742.56	0.5	0.5	0.5	0	0	0	15009.2	26693.5	-41702.8
-506.109	-422.797	-1792.97	0.5	0.5	0.5	0	0	0	13555.9	27792.8	-41348.8
-422.797	-338.216	-1842.18	0.5	0.5	0.5	0	0	0	12349.5	28725.1	-41074.6
-338.216	-252.867	-1889.98	0.5	0.5	0.5	0	0	0	10974.9	29729.9	-40704.8
-252.867	-167.607	-1935.83	0.5	0.5	0.5	0	0	0	9626.45	30734.9	-40361.4
-167.607	-84.2816	-1978.79	0.5	0.5	0.5	0	0	0	8158.02	31873.8	-40031.9
-84.2816	-6.36722	-2017.04	0.5	0.5	0.5	0	0	0	6561.19	33254.3	-39815.5
-6.36722	63.7467	-2049.34	0.5	0.5	0.5	0	0	0	4892.54	34719.6	-39612.1
63.7467	128.32	-2076.82	0.5	0.5	0.5	0	0	0	3361.18	35868.8	-39230
128.32	190.718	-2101.18	0.5	0.5	0.5	0	0	0	1930.5	36771.4	-38701.9
190.718	252.436	-2123.18	0.5	0.5	0.5	0	0	0	526.432	37586	-38112.5
252.436	312.712	-2140.18	0.5	0.5	0.5	0	0	0	-714.796	38470.7	-37755.9
312.712	371.955	-2152.47	0.5	0.5	0.5	0	0	0	-2022.02	39233.6	-37211.6
371.955	431.833	-2163.12	0.5	0.5	0.5	0	0	0	-3413.02	39833.1	-36420.1
431.833	492.374	-2172.1	0.5	0.5	0.5	0	0	0	-4741.55	40453.4	-35711.8
492.374	553.622	-2179.46	0.5	0.5	0.5	0	0	0	-6087.31	41008.4	-34921.1
553.622	615.54	-2185.18	0.5	0.5	0.5	0	0	0	-7405.98	41543.8	-34137.9
615.54	678.089	-2189.26	0.5	0.5	0.5	0	0	0	-8718.86	42038	-33319.2
678.089	741.205	-2191.68	0.5	0.5	0.5	0	0	0	-10012.4	42501.8	-32489.5
741.205	804.822	-2192.42	0.5	0.5	0.5	0	0	0	-11290.3	42929.2	-31638.9
804.822	868.865	-2191.47	0.5	0.5	0.5	0	0	0	-12548.4	43322.3	-30773.9
868.865	933.347	-2188.99	0.5	0.5	0.5	0	0	0	-13792.7	43669.8	-29877.1
933.347	998.183	-2184.95	0.5	0.5	0.5	0	0	0	-15010.3	43985.4	-28975.1
998.183	1063.2	-2179.18	0.5	0.5	0.5	0	0	0	-16197.5	44270.1	-28072.6
1063.2	1128.33	-2171.67	0.5	0.5	0.5	0	0	0	-17361.7	44513	-27151.3
1128.33	1193.47	-2162.41	0.5	0.5	0.5	0	0	0	-18495.8	44718.5	-26222.7
1193.47	1258.54	-2151.4	0.5	0.5	0.5	0	0	0	-19601.9	44883.1	-25281.2
1258.54	1323.45	-2138.63	0.5	0.5	0.5	0	0	0	-20676.3	45007.6	-24331.4
1323.45	1388.11	-2124.1	0.5	0.5	0.5	0	0	0	-21719.6	45090.8	-23371.1
1388.11	1452.44	-2107.81	0.5	0.5	0.5	0	0	0	-22729.7	45132.5	-22402.8
1452.44	1516.32	-2089.77	0.5	0.5	0.5	0	0	0	-23707.6	45132.6	-21425
1516.32	1583.62	-2077.46	0.5	0.5	0.5	0	0	0	-24971.8	44686.4	-19714.6
1583.62	1654.02	-2070.6	0.5	0.5	0.5	0	0	0	-26027	44398.7	-18371.6
1654.02	1723.47	-2061.77	0.5	0.5	0.5	0	0	0	-26827.6	44376.8	-17549.3
1723.47	1791.91	-2051.28	0.5	0.5	0.5	0	0	0	-27735	44166.6	-16431.6
1791.91	1858.92	-2039.25	0.5	0.5	0.5	0	0	0	-28573.7	44007.2	-15433.5
1858.92	1923.97	-2026.2	0.5	0.5	0.5	0	0	0	-29490.1	43806.9	-14316.7
1923.97	1985.96	-2013	0.5	0.5	0.5	0	0	0	-30496.2	43661.7	-13165.5
1985.96	2043.65	-2000.79	0.5	0.5	0.5	0	0	0	-31628.7	43547.1	-11918.4
2043.65	2097.28	-1989.21	0.5	0.5	0.5	0	0	0	-32586.4	43323.3	-10736.9
2097.28	2148.11	-1977.02	0.5	0.5	0.5	0	0	0	-33331.5	42954	-9622.45
2148.11	2180.34	-1954.41	0.5	0.5	0.5	0	0	0	-34751.1	44198.5	-9447.46
2180.34	2194.88	-1921.62	0.5	0.5	0.5	0	0	0	-35754.2	44565.4	-8811.18
2194.88	2207.98	-1887.6	0.5	0.5	0.5	0	0	0	-36145.6	43622.5	-7476.92
2207.98	2219.24	-1851.87	0.5	0.5	0.5	0	0	0	-36759.9	43263.5	-6503.54
2219.24	2228.97	-1814.48	0.5	0.5	0.5	0	0	0	-37200.3	42555.7	-5355.38
2228.97	2237.07	-1775.31	0.5	0.5	0.5	0	0	0	-37669.8	41967.7	-4297.91
2237.07	2243.58	-1734.36	0.5	0.5	0.5	0	0	0	-38073.6	41270.3	-3196.77
2243.58	2248.47	-1691.59	0.5	0.5	0.5	0	0	0	-38461.7	40580.1	-2118.41
2248.47	2251.7	-1647.01	0.5	0.5	0.5	0	0	0	-38811.2	39840.9	-1029.74
2251.7	2253.23	-1600.62	0.5	0.5	0.5	0	0	0	-39135	39082.3	52.7215
2253.23	2274.52	-1563.42	0.5	0.5	0.5	0	0	0	-38350.5	36091.3	2259.15
2274.52	2314.52	-1534.88	0.5	0.5	0.5	0	0	0	-38064.2	34157.7	3906.45
2314.52	2351.92	-1504.14	0.5	0.5	0.5	0	0	0	-38561.7	33855.8	4705.92
2351.92	2387.35	-1471.57	0.5	0.5	0.5	0	0	0	-38621.1	32689.7	5931.32
2387.35	2420.4	-1436.99	0.5	0.5	0.5	0	0	0	-38846.5	31900.4	6946.1
2420.4	2451.18	-1400.52	0.5	0.5	0.5	0	0	0	-38939.5	30872.8	8066.71
2451.18	2476.74	-1361.43	0.5	0.5	0.5	0	0	0	-37222.4	27571.8	9650.54
2476.74	2496.21	-1319.49	0.5	0.5	0.5	0	0	0	-36454.3	25440.9	11013.4
2496.21	2512.9	-1275.58	0.5	0.5	0.5	0	0	0	-36973.2	25027.9	11945.4
2512.9	2527.41	-1229.91	0.5	0.5	0.5	0	0	0	-36739.2	23651.6	13087.6
2527.41	2539.33	-1182.41	0.5	0.5	0.5	0	0	0	-36850.3	22727.1	14123.2
2539.33	2568.4	-1143.12	0.5	0.5	0.5	0	0	0	-35817.8	19617.8	16200.1
2568.4	2613.68	-1111.61	0.5	0.5	0.5	0	0	0	-35338.1	17597.2	17741
2613.68	2655.7	-1077.99	0.5	0.5	0.5	0	0	0	-35400.6	16852.6	18548
2655.7	2694.91	-1042.6	0.5	0.5	0.5	0	0	0	-35108.7	15383.7	19725
2694.91	2731	-1005.3	0.5	0.5	0.5	0	0	0	-34946.9	14243.9	20703
2731	2764.05	-966.196	0.5	0.5	0.5	0	0	0	-34655.2	12883.7	21771.5
2764.05	2793.95	-925.292	0.5	0.5	0.5	0	0	0	-34375	11596.1	22778.9
2793.95	2820.71	-882.641	0.5	0.5	0.5	0	0	0	-34031.4	10230.9	23800.5
2820.71	2844.28	-838.275	0.5	0.5	0.5	0	0	0	-33666.4	8872.06	24794.3
2844.28	2864.65	-792.242	0.5	0.5	0.5	0	0	0	-33258.7	7479.16	25779.5
2864.65	2874.76	-741.006	0.5	0.5	0.5	0	0	0	-33143.9	6758.2	26385.7
2874.76	2874.25	-682.139	0.5	0.5	0.5	0	0	0	-34606.1	5159.05	29447.1
2874.25	2869.98	-618.989	0.5	0.5	0.5	0	0	0	-34481.4	3396.77	31084.6
2869.98	2862.43	-554.074	0.5	0.5	0.5	0	0	0	-33866.6	2105.71	31760.9
2862.43	2851.8	-487.79	0.5	0.5	0.5	0	0	0	-33471.1	564.425	32906.7
2851.8	2838.01	-420.005	0.5	0.5	0.5	0	0	0	-32926.6	-847.219	33773.8
2838.01	2821.12	-350.834	0.5	0.5	0.5	0	0	0	-32434.8	-2328.57	34763.3
2821.12	2801.12	-280.258	0.5	0.5	0.5	0	0	0	-31876.9	-3760.2	35637.1
2801.12	2778.01	-208.269	0.5	0.5	0.5	0	0	0	-31329.6	-5209.02	36538.6
2778.01	2751.73	-134.757	0.5	0.5	0.5	0	0	0	-30732.3	-6618.84	37351.1
2751.73	2687.39	-50.4301	0.5	0.5	0.5	0	0	0	-32538	-4682.59	37220.5
2687.39	2592.7	32.3331	0.5	0.5	0.5	0	0	0	-33599.9	-5106.4	38706.3
2592.7	2505.46	98.3739	0.5	0.5	0.5	0	0	0	-32982.5	-7983.64	40966.2
2505.46	2420.22	156.699	0.5	0.5	0.5	0	0	0	-32833	-9054.06	41887
2420.22	2335.27	211.412	0.5	0.5	0.5	0	0	0	-32187	-10773.1	42960.1
2335.27	2249.31	264.633	0.5	0.5	0.5	0	0	0	-31690	-11983.9	43673.9
2249.31	2162.02	317.275	0.5	0.5	0.5	0	0	0	-31056.5	-13356.6	44413.2
2162.02	2073.1	369.892	0.5	0.5	0.5	0	0	0	-30450.2	-14554.3	45004.5
2073.1	1982.48	422.738	0.5	0.5	0.5	0	0	0	-29809.5	-15775.8	45585.3
1982.48	1890.13	475.938	0.5	0.5	0.5	0	0	0	-29158.5	-16913.9	46072.4
1890.13	1810.35	538.688	0.5	0.5	0.5	0	0	0	-23906	-18679	42585.1
1810.35	1743.19	608.884	0.5	0.5	0.5	0	0	0	-20650.6	-19871.4	40522
1743.19	1674.26	678.25	0.5	0.5	0.5	0	0	0	-21277.6	-20793.5	42071.1
1674.26	1603.69	747.952	0.5	0.5	0.5	0	0	0	-19780.4	-21840.1	41620.5
1603.69	1531.53	817.181	0.5	0.5	0.5	0	0	0	-19382.5	-22741.5	42124
1531.53	1457.91	886.165	0.5	0.5	0.5	0	0	0	-18353.3	-23675.6	42028.8
1457.91	1382.9	954.583	0.5	0.5	0.5	0	0	0	-17621.2	-24526.1	42147.2
1382.9	1306.62	1022.4	0.5	0.5	0.5	0	0	0	-16687.8	-25369.4	42057.2
1306.62	1229.13	1089.44	0.5	0.5	0.5	0	0	0	-15820.8	-26154.1	41974.9
1229.13	1150.55	1155.6	0.5	0.5	0.5	0	0	0	-14877.2	-26916.6	41793.7
1150.55	1074.14	1223.7	0.5	0.5	0.5	0	0	0	-13361.9	-27927.3	41289.2
1074.14	999.884	1293.5	0.5	0.5	0.5	0	0	0	-12113.2	-28752.4	40865.5
999.884	924.707	1361.93	0.5	0.5	0.5	0	0	0	-11256.5	-29320.8	40577.4
924.707	848.772	1428.93	0.5	0.5	0.5	0	0	0	-10149.7	-29976.1	40125.8
848.772	772.124	1494.38	0.5	0.5	0.5	0	0	0	-9139.5	-30528	39667.5
772.124	694.868	1558.17	0.5	0.5	0.5	0	0	0	-8042.1	-31085.2	39127.3
694.868	617.072	1620.19	0.5	0.5	0.5	0	0	0	-6958.55	-31584.3	38542.9
617.072	538.828	1680.36	0.5	0.5	0.5	0	0	0	-5837.52	-32065.8	37903.3
538.828	460.216	1738.57	0.5	0.5	0.5	0	0	0	-4709.22	-32503.5	37212.7
460.216	381.333	1794.74	0.5	0.5	0.5	0	0	0	-3560.52	-32918.3	36478.8
381.333	302.291	1848.77	0.5	0.5	0.5	0	0	0	-2400.75	-33296.5	35697.3
302.291	222.606	1899.84	2.97257e+07	2.35522e+07	2.84746e+07	4.20277e+07	4.6129e+07	3.5511e+07	-1353.68	-33595.9	34949.6
222.606	142.653	1947.75	2.96962e+07	2.36605e+07	2.84268e+07	4.19188e+07	4.60463e+07	3.54876e+07	-220.498	-33913.7	34134.2
142.653	65.5295	1991.1	2.96775e+07	2.37657e+07	2.83805e+07	4.18127e+07	4.59632e+07	3.54661e+07	1032.47	-32796.9	31764.4
65.5295	-7.18326	2028.79	2.96609e+07	2.38664e+07	2.83176e+07	4.17151e+07	4.5868e+07	3.54387e+07	2272.54	-32478.9	30206.3
-7.18326	-77.1792	2062.74	2.96495e+07	2.39604e+07	2.82466e+07	4.1624e+07	4.57685e+07	3.541e+07	3537.29	-33282.7	29745.4
-77.1792	-145.569	2093.68	2.9641e+07	2.4047e+07	2.81772e+07	4.15409e+07	4.56785e+07	3.53837e+07	4750.47	-33358.1	28607.7
-145.569	-212.904	2121.8	2.96361e+07	2.4125e+07	2.81034e+07	4.14649e+07	4.55893e+07	3.53577e+07	5945.01	-33694.1	27749
-212.904	-279.66	2147.4	2.96346e+07	2.41943e+07	2.80274e+07	4.13956e+07	4.55028e+07	3.53329e+07	7118.53	-33797.7	26679.2
-279.66	-345.918	2170.5	2.9637e+07	2.42546e+07	2.79467e+07	4.13315e+07	4.54137e+07	3.53087e+07	8278.36	-33956.2	25677.9
-345.918	-411.759	2191.18	2.96448e+07	2.43061e+07	2.78607e+07	4.12695e+07	4.53174e+07	3.52858e+07	9421.54	-34025	24603.4
-411.759	-476.584	2208.34	2.96572e+07	2.43504e+07	2.77705e+07	4.1209e+07	4.52139e+07	3.52653e+07	10500.1	-34141.4	23641.3
-476.584	-540.39	2222.06	2.96627e+07	2.43883e+07	2.76599e+07	4.11647e+07	4.50972e+07	3.5248e+07	11586	-34181.6	22595.6
-540.39	-603.693	2233.41	2.96648e+07	2.44228e+07	2.75424e+07	4.11336e+07	4.49722e+07	3.52401e+07	12686.2	-34161.3	21475.2
-603.693	-667.231	2242.41	2.96695e+07	2.44563e+07	2.7435e+07	4.11064e+07	4.48481e+07	3.52447e+07	14414.1	-34793.1	20379
-667.231	-732.259	2249.13	2.9669e+07	2.44908e+07	2.73295e+07	4.10941e+07	4.47294e+07	3.52617e+07	16656.9	-35913.1	19256.2
-732.259	-797.157	2253.55	2.96614e+07	2.45297e+07	2.72297e+07	4.10995e+07	4.46239e+07	3.52918e+07	17133.2	-35279.9	18146.7
-797.157	-861.153	2255.64	2.96564e+07	2.45659e+07	2.71331e+07	4.11055e+07	4.4513e+07	3.53353e+07	18442.6	-35474.6	17032
-861.153	-924.59	2255.46	2.96489e+07	2.46029e+07	2.70403e+07	4.11204e+07	4.44067e+07	3.53925e+07	19328.9	-35248.7	15919.8
-924.59	-987.215	2253.01	2.96405e+07	2.46387e+07	2.69503e+07	4.11397e+07	4.43012e+07	3.54639e+07	20350.7	-35162.9	14812.1
-987.215	-1049.1	2248.35	2.963e+07	2.46739e+07	2.6863e+07	4.11648e+07	4.41988e+07	3.55496e+07	21304.3	-35013.1	13708.8
-1049.1	-1108.5	2238.38	2.96174e+07	2.47081e+07	2.67777e+07	4.1195e+07	4.40996e+07	3.56497e+07	22071.7	-34976.3	12904.6
-1108.5	-1165.47	2223.28	2.96123e+07	2.475e+07	2.67328e+07	4.12045e+07	4.40244e+07	3.57504e+07	22934.6	-34886.3	11951.6
-1165.47	-1221.59	2206.17	2.96118e+07	2.479e+07	2.67042e+07	4.12007e+07	4.39628e+07	3.58455e+07	23798.2	-34599.7	10801.6
-1221.59	-1276.8	2187.05	2.96105e+07	2.48172e+07	2.66605e+07	4.11996e+07	4.38986e+07	3.59406e+07	24650.7	-34425.9	9775.18
-1276.8	-1331.08	2165.98	2.96104e+07	2.48375e+07	2.66178e+07	4.11939e+07	4.38396e+07	3.60319e+07	25423.3	-34125	8701.7
-1331.08	-1384.39	2143.01	2.96107e+07	2.48477e+07	2.65694e+07	4.11866e+07	4.37815e+07	3.61211e+07	26224.4	-33898.2	7673.78
-1384.39	-1436.68	2118.18	2.96116e+07	2.48501e+07	2.65199e+07	4.11764e+07	4.37268e+07	3.62069e+07	26925.1	-33568	6642.89
-1436.68	-1487.94	2091.55	2.96128e+07	2.48436e+07	2.64683e+07	4.11633e+07	4.36739e+07	3.62895e+07	27663	-33298.3	5635.27
-1487.94	-1538.12	2063.17	2.96141e+07	2.48297e+07	2.64163e+07	4.11476e+07	4.36238e+07	3.63684e+07	28297.9	-32935.3	4637.44
-1538.12	-1587.18	2033.1	2.96155e+07	2.48078e+07	2.63643e+07	4.11286e+07	4.35756e+07	3.64433e+07	28971.3	-32627.1	3655.84
-1587.18	-1635.1	2001.52	2.96166e+07	2.47791e+07	2.63134e+07	4.1107e+07	4.35299e+07	3.65139e+07	29550.9	-32227.7	2676.77
-1635.1	-1681.82	1968.51	2.96149e+07	2.47338e+07	2.62409e+07	4.1097e+07	4.34772e+07	3.65966e+07	30171.5	-31885.2	1713.65
-1681.82	-1727.1	1934.16	2.96091e+07	2.46804e+07	2.61602e+07	4.10933e+07	4.34241e+07	3.66915e+07	30709.2	-31472.1	762.905
-1727.1	-1770.66	1898.74	2.95996e+07	2.46277e+07	2.60899e+07	4.1082e+07	4.33775e+07	3.6788e+07	31321	-31124.6	-196.439
-1770.66	-1811.92	1862.81	2.95864e+07	2.4571e+07	2.60226e+07	4.10647e+07	4.33338e+07	3.68892e+07	31918.6	-30740.8	-1177.81
-1811.92	-1849.92	1827.28	2.95705e+07	2.4511e+07	2.59641e+07	4.10313e+07	4.32939e+07	3.69899e+07	32682.7	-30472.1	-2210.63
-1849.92	-1884.48	1792.33	2.95532e+07	2.44497e+07	2.59108e+07	4.09869e+07	4.32593e+07	3.70907e+07	33318.1	-30106.6	-3211.53
-1884.48	-1916.44	1757.16	2.9535e+07	2.43903e+07	2.58613e+07	4.09357e+07	4.32321e+07	3.71916e+07	33841.3	-29705.1	-4136.19
-1916.44	-1946.42	1721.19	2.95162e+07	2.43332e+07	2.58151e+07	4.08792e+07	4.32129e+07	3.72927e+07	34228	-29201.3	-5026.61
-1946.42	-1974.7	1684.16	2.94966e+07	2.42786e+07	2.57718e+07	4.08173e+07	4.32019e+07	3.73936e+07	34607.5	-28715.8	-5891.72
-1974.7	-1998.04	1644.17	2.94761e+07	2.42271e+07	2.5731e+07	4.0751e+07	4.31997e+07	3.74941e+07	35051.5	-28474.9	-6576.57
-1998.04	-2016.65	1601.25	2.94555e+07	2.41937e+07	2.56994e+07	4.06901e+07	4.3211e+07	3.75858e+07	35433.5	-28094.5	-7339.01
-2016.65	-2033.84	1557.16	2.94324e+07	2.41687e+07	2.56735e+07	4.06313e+07	4.32298e+07	3.76699e+07	35614.5	-27405.7	-8208.84
-2033.84	-2049.55	1511.83	2.94044e+07	2.41382e+07	2.56483e+07	4.05675e+07	4.32508e+07	3.7751e+07	35876	-26870.1	-9005.86
-2049.55	-2063.8	1465.31	2.93725e+07	2.41098e+07	2.56257e+07	4.05027e+07	4.32764e+07	3.78266e+07	36030.1	-26200.8	-9829.27
-2063.8	-2076.55	1417.59	2.93357e+07	2.40801e+07	2.56045e+07	4.04349e+07	4.33052e+07	3.78977e+07	36220.1	-25592.7	-10627.4
-2076.55	-2085.9	1368.64	2.92942e+07	2.40515e+07	2.55848e+07	4.03656e+07	4.33376e+07	3.79636e+07	34759.2	-23336.6	-11422.7
-2085.9	-2091.69	1318.46	2.92391e+07	2.40048e+07	2.55662e+07	4.02773e+07	4.33697e+07	3.80246e+07	34520.5	-22311.8	-12208.7
-2091.69	-2095.8	1267.13	2.91756e+07	2.39546e+07	2.55483e+07	4.01841e+07	4.34044e+07	3.80805e+07	34792.2	-21794.7	-12997.5
-2095.8	-2098.4	1214.7	2.91065e+07	2.39073e+07	2.55307e+07	4.00919e+07	4.34423e+07	3.81313e+07	34742	-20964.3	-13777.7
-2098.4	-2099.32	1161.16	2.90302e+07	2.38599e+07	2.55129e+07	3.99978e+07	4.3483e+07	3.8177e+07	34817.7	-20263.9	-14553.8
-2099.32	-2077.67	1095.87	2.89475e+07	2.38143e+07	2.54944e+07	3.99035e+07	4.35263e+07	3.82176e+07	35732.5	-21404	-14328.5
-2077.67	-2034.18	1019.26	2.8864e+07	2.37987e+07	2.5483e+07	3.98212e+07	4.3568e+07	3.82377e+07	36152.8	-21518.5	-14634.3
-2034.18	-1989.57	941.969	2.87733e+07	2.37952e+07	2.54756e+07	3.97443e+07	4.36011e+07	3.82414e+07	35839.1	-20195.3	-15643.8
-1989.57	-1943.27	862.029	2.8669e+07	2.37812e+07	2.54672e+07	3.96631e+07	4.36253e+07	3.82386e+07	37388.6	-19622.1	-17766.4
-1943.27	-1895.54	780.072	2.85668e+07	2.377e+07	2.54537e+07	3.95963e+07	4.36397e+07	3.82393e+07	37062.6	-18614.7	-18447.9
-1895.54	-1846.22	697.38	2.84529e+07	2.37558e+07	2.5441e+07	3.95258e+07	4.36445e+07	3.82301e+07	37041.9	-17811	-19230.9
-1846.22	-1795.38	613.929	2.83306e+07	2.37429e+07	2.54287e+07	3.94546e+07	4.36389e+07	3.82122e+07	36843.5	-16868.3	-19975.2
-1795.38	-1742.97	529.807	2.81988e+07	2.37301e+07	2.54165e+07	3.93813e+07	4.3623e+07	3.81857e+07	36693.6	-15971	-20722.6
-1742.97	-1689.04	445.108	2.80587e+07	2.37191e+07	2.54042e+07	3.93062e+07	4.35963e+07	3.81509e+07	36504	-15016.9	-21487.1
-1689.04	-1633.67	360.083	2.79104e+07	2.37103e+07	2.53915e+07	3.92291e+07	4.35586e+07	3.81083e+07	36299.2	-14055.9	-22243.3
-1633.67	-1594.15	283.482	2.77547e+07	2.37046e+07	2.53785e+07	3.91497e+07	4.35097e+07	3.80578e+07	35284.7	-11457.2	-23827.5
-1594.15	-1569.91	215.17	2.7589e+07	2.36913e+07	2.53627e+07	3.90651e+07	4.34549e+07	3.80071e+07	34664.1	-9702.67	-24961.5
-1569.91	-1544.13	147.227	2.7417e+07	2.36782e+07	2.53441e+07	3.89773e+07	4.33948e+07	3.79536e+07	34645.3	-9046.16	-25599.1
-1544.13	-1517.83	81.0614	2.72426e+07	2.3673e+07	2.53231e+07	3.88889e+07	4.33268e+07	3.78942e+07	34308.1	-7706.18	-26601.9
-1517.83	-1491.81	18.5319	2.7065e+07	2.36705e+07	2.52989e+07	3.87987e+07	4.32531e+07	3.78331e+07	34213.1	-6604.9	-27608.2
-1491.81	-1467.14	-36.6125	2.68865e+07	2.36725e+07	2.52704e+07	3.87078e+07	4.31735e+07	3.77722e+07	32409.8	-5249.85	-27159.9
-1467.14	-1443.24	-85.6976	2.66906e+07	2.3677e+07	2.52374e+07	3.86062e+07	4.30897e+07	3.7697e+07	32214.9	-4047.79	-28167.1
-1443.24	-1418.84	-132.517	2.64936e+07	2.36857e+07	2.51974e+07	3.8503e+07	4.30018e+07	3.76247e+07	31798.2	-2856.82	-28941.4
-1418.84	-1393.24	-178.285	2.6294e+07	2.36988e+07	2.515e+07	3.8397e+07	4.29101e+07	3.75533e+07	31398.1	-1699.61	-29698.5
-1393.24	-1366.04	-223.732	2.6093e+07	2.37167e+07	2.50947e+07	3.8288e+07	4.28148e+07	3.74832e+07	30911.9	-540.079	-30371.9
-1366.04	-1329.43	-263.17	2.58904e+07	2.37395e+07	2.50312e+07	3.81754e+07	4.2716e+07	3.74138e+07	31681.9	-90.3868	-31591.5
-1329.43	-1283.58	-296.961	2.56875e+07	2.37678e+07	2.49593e+07	3.80591e+07	4.2613e+07	3.7345e+07	31729.9	745.38	-32475.2
-1283.58	-1235.94	-331.245	2.54835e+07	2.38007e+07	2.48788e+07	3.7938e+07	4.25064e+07	3.72765e+07	30843.3	2086.49	-32929.8
-1235.94	-1186.27	-366.007	2.52792e+07	2.38379e+07	2.47896e+07	3.78121e+07	4.23965e+07	3.72088e+07	30418.1	3152.53	-33570.6
-1186.27	-1134.61	-401.381	2.5076e+07	2.38797e+07	2.46918e+07	3.76813e+07	4.22832e+07	3.71417e+07	29706.4	4363.31	-34069.8
-1134.61	-1080.88	-437.363	2.4874e+07	2.39257e+07	2.45853e+07	3.75452e+07	4.21669e+07	3.70751e+07	29112.7	5489.92	-34602.6
-1080.88	-1025.1	-473.979	2.46742e+07	2.39757e+07	2.44704e+07	3.74036e+07	4.20476e+07	3.70088e+07	28420.9	6653.84	-35074.7
-1025.1	-967.265	-511.204	2.4477e+07	2.40296e+07	2.4347e+07	3.72562e+07	4.19257e+07	3.69428e+07	27749	7786.15	-35535.2
-967.265	-907.392	-549.011	2.42833e+07	2.40872e+07	2.42155e+07	3.71031e+07	4.18011e+07	3.68768e+07	27034.7	8921.56	-35956.2
-907.392	-845.509	-587.356	2.40936e+07	2.41483e+07	2.4076e+07	3.69439e+07	4.16743e+07	3.68108e+07	26313	10037.6	-36350.6
-845.509	-784.711	-629.011	2.39085e+07	2.42126e+07	2.39288e+07	3.67785e+07	4.15452e+07	3.67445e+07	25016.7	11428.9	-36445.6
-784.711	-724.934	-673.808	2.37514e+07	2.42758e+07	2.37859e+07	3.66106e+07	4.14202e+07	3.6702e+07	23999.8	12649	-36648.8
-724.934	-663.199	-718.848	2.36136e+07	2.43394e+07	2.36454e+07	3.64406e+07	4.12979e+07	3.66701e+07	23355.3	13649.5	-37004.9
-663.199	-599.644	-764.11	2.34795e+07	2.44056e+07	2.34997e+07	3.62679e+07	4.11749e+07	3.66308e+07	22481.1	14739.9	-37221.1
-599.644	-534.313	-809.468	2.33572e+07	2.44729e+07	2.33533e+07	3.60926e+07	4.1053e+07	3.65929e+07	21700.7	15752	-37452.7
-534.313	-467.34	-854.831	2.32427e+07	2.45416e+07	2.32041e+07	3.5915e+07	4.09316e+07	3.6552e+07	20840.6	16774.7	-37615.3
-467.34	-398.875	-900.054	2.31383e+07	2.4611e+07	2.30539e+07	3.57349e+07	4.08111e+07	3.65104e+07	19992.2	17762.2	-37754.4
-398.875	-329.186	-944.956	2.30431e+07	2.46809e+07	2.29023e+07	3.55526e+07	4.06915e+07	3.6467e+07	19103.5	18744.7	-37848.1
-329.186	-258.719	-989.249	2.29575e+07	2.47509e+07	2.275e+07	3.53681e+07	4.05732e+07	3.64224e+07	18194	19721.5	-37915.6
-258.719	-188.29	-1032.47	2.28813e+07	2.48204e+07	2.2597e+07	3.51818e+07	4.04566e+07	3.63764e+07	17237.9	20724.3	-37962.2
-188.29	-121.053	-1076.7	2.28144e+07	2.48887e+07	2.2444e+07	3.49938e+07	4.03425e+07	3.63293e+07	15792	21954.4	-37746.4
-121.053	-58.4906	-1120.99	2.27555e+07	2.49552e+07	2.22908e+07	3.4805e+07	4.02321e+07	3.62805e+07	14517.1	23153.1	-37670.1
-58.4906	-1.10384	-1161.29	2.2705e+07	2.50186e+07	2.21381e+07	3.46161e+07	4.01269e+07	3.62307e+07	13457.3	24361.1	-37818.5
-1.10384	49.835	-1197	2.26625e+07	2.50775e+07	2.19867e+07	3.44281e+07	4.00297e+07	3.61808e+07	12200.8	25629.2	-37830
49.835	96.2694	-1229	2.26278e+07	2.51307e+07	2.18361e+07	3.42418e+07	3.99414e+07	3.61302e+07	11113.7	26633.4	-37747.1
96.2694	140.519	-1258.47	2.26019e+07	2.51782e+07	2.16853e+07	3.40574e+07	3.98594e+07	3.60775e+07	10022.9	27501.3	-37524.2
140.519	183.789	-1285.95	2.25858e+07	2.52199e+07	2.15335e+07	3.38747e+07	3.97806e+07	3.60214e+07	8969.21	28271.6	-37240.8
183.789	226.76	-1311.75	2.25805e+07	2.52566e+07	2.13801e+07	3.36926e+07	3.97002e+07	3.59608e+07	7907.72	28972.2	-36879.9
226.76	269.831	-1336.01	2.2586e+07	2.52888e+07	2.12253e+07	3.35101e+07	3.96152e+07	3.58953e+07	6849.97	29615	-36465
269.831	313.23	-1358.83	2.26008e+07	2.53164e+07	2.10707e+07	3.33274e+07	3.95276e+07	3.58259e+07	5783.58	30208.3	-35991.9
313.23	357.086	-1380.2	2.26232e+07	2.53394e+07	2.09175e+07	3.31446e+07	3.94392e+07	3.57535e+07	4711.01	30757.9	-35468.9
357.086	408.681	-1412.51	2.26527e+07	2.53575e+07	2.07663e+07	3.2962e+07	3.93502e+07	3.5678e+07	3147.82	32031.6	-35179.4
408.681	468.981	-1456.44	2.26834e+07	2.53723e+07	2.06199e+07	3.27845e+07	3.92672e+07	3.56011e+07	1839.06	33403.4	-35242.5
468.981	530.073	-1498.86	2.27179e+07	2.53854e+07	2.04858e+07	3.26118e+07	3.91916e+07	3.55272e+07	865.66	33360.7	-34226.4
530.073	589.175	-1537.17	2.2759e+07	2.53964e+07	2.03567e+07	3.24415e+07	3.91091e+07	3.54522e+07	-309.951	32206.9	-31896.9
589.175	646.505	-1571.53	2.28041e+07	2.54028e+07	2.02194e+07	3.22752e+07	3.90076e+07	3.53695e+07	-1392.07	32143.7	-30751.6
646.505	703.991	-1603.84	2.28535e+07	2.54047e+07	2.00849e+07	3.21123e+07	3.89003e+07	3.5286e+07	-2534.23	32720.3	-30186.1
703.991	761.807	-1634.27	2.29063e+07	2.5403e+07	1.99582e+07	3.19535e+07	3.87948e+07	3.52046e+07	-3655.09	32896.7	-29241.6
761.807	819.743	-1662.63	2.29618e+07	2.53967e+07	1.9836e+07	3.17986e+07	3.86873e+07	3.51242e+07	-4798.02	33236	-28438
819.743	877.796	-1688.93	2.30195e+07	2.53863e+07	1.97195e+07	3.16479e+07	3.85798e+07	3.50456e+07	-5936.7	33434.1	-27497.4
877.796	935.854	-1713.06	2.30788e+07	2.53709e+07	1.96077e+07	3.15016e+07	3.84715e+07	3.49687e+07	-7083.96	33656.8	-26572.8
935.854	993.07	-1733.5	2.31389e+07	2.53508e+07	1.95004e+07	3.13599e+07	3.8363e+07	3.48939e+07	-8164.33	33888.8	-25724.5
993.07	1049.4	-1750.25	2.31999e+07	2.53257e+07	1.93985e+07	3.12221e+07	3.8255e+07	3.48215e+07	-9282.36	34066.1	-24783.8
1049.4	1105.55	-1764.76	2.3261e+07	2.52952e+07	1.93006e+07	3.10886e+07	3.81475e+07	3.47513e+07	-10445.2	34149.6	-23704.4
1105.55	1161.46	-1776.96	2.33213e+07	2.5259e+07	1.92053e+07	3.09601e+07	3.80398e+07	3.46831e+07	-11580.7	34236.6	-22655.9
1161.46	1217.05	-1786.84	2.33806e+07	2.5217e+07	1.91127e+07	3.08363e+07	3.79324e+07	3.46172e+07	-12724.6	34275.2	-21550.6
1217.05	1272.26	-1794.37	2.34382e+07	2.51691e+07	1.90224e+07	3.07176e+07	3.78252e+07	3.45538e+07	-13855.9	34295.3	-20439.5
1272.26	1327.03	-1799.53	2.34939e+07	2.51153e+07	1.89342e+07	3.06041e+07	3.77186e+07	3.44931e+07	-14983	34281.6	-19298.6
1327.03	1381.28	-1802.33	2.35471e+07	2.50555e+07	1.88476e+07	3.04959e+07	3.76127e+07	3.44353e+07	-16100	34244.7	-18144.7
1381.28	1434.96	-1802.76	2.35977e+07	2.49898e+07	1.87625e+07	3.03932e+07	3.75076e+07	3.43806e+07	-17208.2	34180.2	-16972
1434.96	1487.96	-1800.85	2.36452e+07	2.49182e+07	1.86787e+07	3.0296e+07	3.74035e+07	3.43291e+07	-18307	34093.4	-15786.4
1487.96	1538.72	-1794.06	2.36894e+07	2.48408e+07	1.85959e+07	3.02045e+07	3.73006e+07	3.4281e+07	-19292.2	34121.5	-14829.3
1538.72	1587.09	-1782.63	2.37317e+07	2.47604e+07	1.85226e+07	3.01141e+07	3.72039e+07	3.42347e+07	-20340.9	34064.6	-13723.7
1587.09	1634.21	-1769.44	2.37716e+07	2.46747e+07	1.8453e+07	3.00266e+07	3.71109e+07	3.41882e+07	-21483.8	33905.6	-12421.8
1634.21	1679.56	-1754.83	2.3808e+07	2.45811e+07	1.83802e+07	2.99453e+07	3.70182e+07	3.41422e+07	-22624.5	33808.6	-11184.1
1679.56	1722.39	-1739.53	2.38408e+07	2.44815e+07	1.83077e+07	2.98694e+07	3.69277e+07	3.40964e+07	-23864.4	33712.9	-9848.5
1722.39	1761.96	-1724.2	2.38696e+07	2.43755e+07	1.82337e+07	2.98006e+07	3.68387e+07	3.40516e+07	-25144.7	33651.9	-8507.2
1761.96	1798.54	-1708.58	2.38942e+07	2.42637e+07	1.81595e+07	2.9739e+07	3.67516e+07	3.40078e+07	-26312.5	33514	-7201.43
1798.54	1833.41	-1691.88	2.39149e+07	2.41453e+07	1.80858e+07	2.96824e+07	3.66652e+07	3.39652e+07	-27712.2	33674.9	-5962.77
1833.41	1869.53	-1673.76	2.3932e+07	2.40233e+07	1.80142e+07	2.96312e+07	3.65812e+07	3.3923e+07	-30807	35544.8	-4737.73
1869.53	1905.16	-1653.92	2.39453e+07	2.39149e+07	1.79443e+07	2.96026e+07	3.65128e+07	3.38811e+07	-30714.1	34267.1	-3552.94
1905.16	1951.5	-1638.73	2.39577e+07	2.37945e+07	1.7876e+07	2.95671e+07	3.6438e+07	3.38394e+07	-31510.6	33286.6	-1776.05
1951.5	2008.94	-1627.81	2.39706e+07	2.36552e+07	1.77958e+07	2.95251e+07	3.63508e+07	3.38055e+07	-31864.1	32217	-352.868
2008.94	2064.92	-1614.59	2.39857e+07	2.3508e+07	1.77117e+07	2.94747e+07	3.62594e+07	3.37804e+07	-32863.2	32251	612.275
2064.92	2119.95	-1599.29	2.40036e+07	2.33753e+07	1.7634e+07	2.94283e+07	3.61796e+07	3.376e+07	-33580.1	31776.8	1803.31
2119.95	2173.69	-1581.87	2.40246e+07	2.32472e+07	1.75573e+07	2.93811e+07	3.61055e+07	3.37464e+07	-34292.5	31445.8	2846.74
2173.69	2225.49	-1562.4	2.40492e+07	2.31282e+07	1.74844e+07	2.9335e+07	3.60403e+07	3.37383e+07	-34369.2	30428.8	3940.4
2225.49	2273.14	-1540.85	2.40766e+07	2.30101e+07	1.74137e+07	2.92838e+07	3.598e+07	3.37363e+07	-33110.7	28140.1	4970.61
2273.14	2318.81	-1517.36	2.41041e+07	2.28803e+07	1.73461e+07	2.92157e+07	3.59195e+07	3.37397e+07	-34714.5	28704.3	6010.19
2318.81	2363.49	-1492.03	2.41366e+07	2.27676e+07	1.72811e+07	2.91588e+07	3.58732e+07	3.37487e+07	-34707.4	27689.7	7017.73
2363.49	2406.6	-1464.91	2.41715e+07	2.26561e+07	1.72187e+07	2.90983e+07	3.58342e+07	3.37629e+07	-35493.3	27487	8006.26
2406.6	2406.61	-1414.72	2.42107e+07	2.25544e+07	1.7159e+07	2.90422e+07	3.58064e+07	3.37824e+07	-37683.4	30702	6981.41
2406.61	2364.89	-1342.38	2.42569e+07	2.25142e+07	1.71269e+07	2.90162e+07	3.58024e+07	3.37827e+07	-39049.5	32045	7004.48
2364.89	2322.96	-1269.16	2.43024e+07	2.24977e+07	1.71106e+07	2.90096e+07	3.58016e+07	3.37664e+07	-38877.2	30457.2	8420
2322.96	2279.72	-1194.6	2.43398e+07	2.24567e+07	1.70936e+07	2.90003e+07	3.57884e+07	3.37471e+07	-39465.2	30430.1	9035.14
2279.72	2235.73	-1119.05	2.43733e+07	2.2418e+07	1.70851e+07	2.89988e+07	3.57691e+07	3.37174e+07	-39573.9	29537.2	10036.7
2235.73	2190.65	-1042.45	2.44003e+07	2.2369e+07	1.70813e+07	2.89989e+07	3.57398e+07	3.36815e+07	-39870.6	29087.6	10783
2190.65	2144.63	-964.934	2.44222e+07	2.23181e+07	1.7085e+07	2.90029e+07	3.57016e+07	3.3637e+07	-39995.1	28373	11622.1
2144.63	2097.53	-886.537	2.4447e+07	2.22885e+07	1.70986e+07	2.90242e+07	3.56569e+07	3.35819e+07	-40141.2	27774.5	12366.7
2097.53	2049.39	-807.352	2.44718e+07	2.22705e+07	1.71214e+07	2.90543e+07	3.56032e+07	3.3517e+07	-40204.4	27084.8	13119.7
2049.39	2000.15	-727.436	2.44898e+07	2.22446e+07	1.71508e+07	2.90812e+07	3.55377e+07	3.3446e+07	-40241.4	26414.2	13827.2
2000.15	1949.79	-646.873	2.45047e+07	2.2222e+07	1.71883e+07	2.91103e+07	3.5461e+07	3.33673e+07	-40222.1	25701.3	14520.8
1949.79	1912.46	-572.971	2.45142e+07	2.21981e+07	1.72333e+07	2.91381e+07	3.53723e+07	3.32818e+07	-39514.8	23654	15860.8
1912.46	1887.63	-505.524	2.45205e+07	2.21822e+07	1.72881e+07	2.91677e+07	3.52705e+07	3.31865e+07	-39106.3	22287.1	16819.2
1887.63	1861.17	-437.455	2.45219e+07	2.21704e+07	1.73521e+07	2.91968e+07	3.51541e+07	3.30823e+07	-39119	21839.5	17279.6
1861.17	1833.48	-369.121	2.45175e+07	2.21595e+07	1.74239e+07	2.92241e+07	3.50231e+07	3.29714e+07	-38839.4	20845.7	17993.7
1833.48	1804.43	-300.718	2.45076e+07	2.21519e+07	1.7504e+07	2.92495e+07	3.48769e+07	3.28534e+07	-38658.8	20090.1	18568.8
1804.43	1774.34	-232.82	2.44921e+07	2.21473e+07	1.75917e+07	2.92725e+07	3.47157e+07	3.27294e+07	-38378.4	19136.9	19241.4
1774.34	1743.57	-166.322	2.44711e+07	2.21466e+07	1.76868e+07	2.92928e+07	3.45391e+07	3.25999e+07	-38125.3	18200.5	19924.8
1743.57	1712.93	-102.808	2.44446e+07	2.21499e+07	1.77885e+07	2.93101e+07	3.43474e+07	3.24662e+07	-37862.2	17132.2	20730
1712.93	1683.57	-44.6457	2.4413e+07	2.21571e+07	1.78958e+07	2.93243e+07	3.41411e+07	3.23303e+07	-37648.6	15970.5	21678.2
1683.57	1657.01	5.25471	2.43762e+07	2.21682e+07	1.80072e+07	2.93352e+07	3.39209e+07	3.2195e+07	-37479.8	14666.3	22813.5
1657.01	1646.66	49.5504	2.43344e+07	2.21825e+07	1.8121e+07	2.93427e+07	3.36882e+07	3.20634e+07	-35728	12128	23600
1646.66	1649.57	92.7484	2.42759e+07	2.21826e+07	1.82355e+07	2.93363e+07	3.34542e+07	3.19374e+07	-34568.3	10429.9	24138.4
1649.57	1650.53	135.457	2.41952e+07	2.21871e+07	1.83544e+07	2.93121e+07	3.32181e+07	3.17936e+07	-34401.3	9659.92	24741.4
1650.53	1649.63	178.089	2.4112e+07	2.22068e+07	1.84729e+07	2.92842e+07	3.29758e+07	3.16454e+07	-33628.3	8358.34	25270
1649.63	1646.49	220.894	2.40256e+07	2.22317e+07	1.85888e+07	2.9252e+07	3.27317e+07	3.15013e+07	-33118.2	7307.54	25810.6
1646.49	1641.07	264.041	2.39363e+07	2.22665e+07	1.87018e+07	2.92156e+07	3.24838e+07	3.13573e+07	-32410.6	6083.52	26327.1
1641.07	1633.21	307.641	2.38439e+07	2.2308e+07	1.8811e+07	2.91747e+07	3.22338e+07	3.12158e+07	-31758.5	4914.86	26843.6
1633.21	1622.85	351.767	2.37485e+07	2.23572e+07	1.89159e+07	2.91293e+07	3.19813e+07	3.10755e+07	-31030.5	3679.57	27350.9
1622.85	1609.92	396.464	2.36501e+07	2.24127e+07	1.90157e+07	2.90792e+07	3.1727e+07	3.09374e+07	-30301.3	2445.51	27855.8
1609.92	1594.39	441.761	2.35487e+07	2.24744e+07	1.91098e+07	2.90243e+07	3.14712e+07	3.08012e+07	-29534.4	1179.01	28355.4
1594.39	1578	489.324	2.34445e+07	2.25416e+07	1.91977e+07	2.89647e+07	3.12144e+07	3.06677e+07	-28430.2	-266.986	28697.2
1578	1560.68	539.102	2.33178e+07	2.25861e+07	1.92784e+07	2.8895e+07	3.09856e+07	3.05445e+07	-27474.4	-1641.44	29115.8
1560.68	1540.61	589.443	2.31811e+07	2.26266e+07	1.93505e+07	2.88228e+07	3.07764e+07	3.04172e+07	-26733	-2906.48	29639.5
1540.61	1517.82	640.372	2.30522e+07	2.26823e+07	1.94149e+07	2.8755e+07	3.05683e+07	3.02781e+07	-25848.7	-4247.69	30096.4
1517.82	1492.3	691.852	2.29262e+07	2.27385e+07	1.94743e+07	2.86916e+07	3.03726e+07	3.01382e+07	-25016	-5560.54	30576.5
1492.3	1464.06	743.873	2.28077e+07	2.27993e+07	1.95287e+07	2.86347e+07	3.01843e+07	2.99964e+07	-24133	-6896.48	31029.4
1464.06	1433.12	796.405	2.26947e+07	2.28603e+07	1.95791e+07	2.85846e+07	3.00069e+07	2.98557e+07	-23256.6	-8223.05	31479.7
1433.12	1399.48	849.422	2.2588e+07	2.29221e+07	1.96252e+07	2.85422e+07	2.98389e+07	2.97161e+07	-22358.7	-9552.67	31911.4
1399.48	1363.19	902.891	2.24868e+07	2.2983e+07	1.96674e+07	2.85081e+07	2.96815e+07	2.95788e+07	-21456.5	-10873.8	32330.3
1363.19	1324.28	956.774	2.23907e+07	2.30427e+07	1.97056e+07	2.84828e+07	2.95345e+07	2.9444e+07	-20542.6	-12187.7	32730.3
1324.28	1277.83	1006.43	2.22993e+07	2.31003e+07	1.97398e+07	2.84669e+07	2.93982e+07	2.93125e+07	-20514	-13026.7	33540.6
1277.83	1224.08	1052	2.22589e+07	2.31622e+07	1.97854e+07	2.8457e+07	2.92601e+07	2.92218e+07	-20001.3	-14097.6	34098.8
1224.08	1167.99	1098.01	2.22437e+07	2.3225e+07	1.98358e+07	2.84459e+07	2.91233e+07	2.91577e+07	-18846.3	-15479.2	34325.5
1167.99	1109.5	1144.34	2.22117e+07	2.32855e+07	1.98745e+07	2.84339e+07	2.89928e+07	2.90869e+07	-18033.7	-16659.9	34693.6
1109.5	1048.77	1190.96	2.21851e+07	2.33455e+07	1.99108e+07	2.84201e+07	2.88659e+07	2.90262e+07	-17035.3	-17911.2	34946.5
1048.77	985.82	1237.79	2.21524e+07	2.34039e+07	1.994e+07	2.84053e+07	2.87445e+07	2.8967e+07	-16135.9	-19082.4	35218.3
985.82	920.76	1284.78	2.21205e+07	2.34613e+07	1.99653e+07	2.8389e+07	2.86275e+07	2.89137e+07	-15183.1	-20251	35434.1
920.76	853.666	1331.86	2.20863e+07	2.35175e+07	1.99855e+07	2.83714e+07	2.85157e+07	2.88642e+07	-14259.3	-21371.3	35630.6
853.666	784.637	1378.95	2.2052e+07	2.35728e+07	2.00018e+07	2.83522e+07	2.84088e+07	2.88196e+07	-13320.4	-22464.6	35785
784.637	713.766	1425.98	2.20171e+07	2.36272e+07	2.00143e+07	2.83315e+07	2.83071e+07	2.87793e+07	-12390.5	-23516.1	35906.6
713.766	635.741	1467.81	2.19824e+07	2.36809e+07	2.00237e+07	2.83093e+07	2.82102e+07	2.87434e+07	-12433.4	-24025.6	36459
635.741	550.884	1504.53	2.19609e+07	2.37366e+07	2.0034e+07	2.82785e+07	2.81096e+07	2.87167e+07	-11955.3	-24765.2	36720.6
550.884	464.753	1541.08	2.19448e+07	2.37944e+07	2.00419e+07	2.82376e+07	2.80078e+07	2.86959e+07	-10775.4	-25828.5	36603.9
464.753	377.477	1577.19	2.19248e+07	2.38532e+07	2.00445e+07	2.81899e+07	2.79106e+07	2.8677e+07	-9971.51	-26662	36633.5
377.477	289.587	1612.64	2.19068e+07	2.39138e+07	2.00442e+07	2.81333e+07	2.78151e+07	2.86615e+07	-8954.81	-27581.1	36535.9
289.587	201.962	1646.9	2.18887e+07	2.39762e+07	2.00407e+07	2.8069e+07	2.77234e+07	2.86484e+07	-8020.11	-28457.4	36477.5
201.962	116.503	1679.01	2.18725e+07	2.40406e+07	2.00352e+07	2.79964e+07	2.76353e+07	2.86377e+07	-6963.26	-29451.1	36414.4
116.503	36.8162	1707.06	2.18575e+07	2.41068e+07	2.00282e+07	2.79164e+07	2.7553e+07	2.86294e+07	-5812.27	-30640.5	36452.7
36.8162	-32.4291	1728.66	2.18437e+07	2.41743e+07	2.0021e+07	2.78301e+07	2.74796e+07	2.86234e+07	-4499.63	-32088.2	36587.8
-32.4291	-91.9322	1744.12	2.18306e+07	2.42421e+07	2.00144e+07	2.77392e+07	2.74193e+07	2.86195e+07	-3302.24	-33266.1	36568.4
-91.9322	-146.421	1755.84	2.18196e+07	2.43092e+07	2.00072e+07	2.76445e+07	2.73707e+07	2.86162e+07	-2261.6	-34068.3	36329.9
-146.421	-203.886	1776.69	2.18124e+07	2.43749e+07	1.99981e+07	2.75456e+07	2.73309e+07	2.86118e+07	-681.258	-34243.3	34924.6
-203.886	-265.712	1807.02	2.18043e+07	2.44389e+07	1.99791e+07	2.74482e+07	2.72942e+07	2.86015e+07	536.185	-34531	33994.8
-265.712	-327.376	1835.65	2.17989e+07	2.45016e+07	1.99567e+07	2.73514e+07	2.72608e+07	2.85885e+07	1327.66	-35106.6	33778.9
-327.376	-389.172	1862.88	2.17999e+07	2.45665e+07	1.99513e+07	2.72522e+07	2.72468e+07	2.85816e+07	2343.59	-35434	33090.4
-389.172	-451.075	1888.57	2.18056e+07	2.46331e+07	1.9953e+07	2.71519e+07	2.72419e+07	2.85755e+07	3240.8	-35815	32574.2
-451.075	-513.108	1912.74	2.18168e+07	2.46993e+07	1.99539e+07	2.70496e+07	2.72354e+07	2.85669e+07	4205.93	-36093.1	31887.2
-513.108	-575.198	1935.28	2.18327e+07	2.47667e+07	1.99586e+07	2.69458e+07	2.72329e+07	2.85574e+07	5140.07	-36356.8	31216.7
-575.198	-637.287	1956.16	2.1853e+07	2.48348e+07	1.99652e+07	2.68406e+07	2.72317e+07	2.8546e+07	6096.52	-36560.9	30464.4
-637.287	-699.29	1975.27	2.18775e+07	2.49041e+07	1.99748e+07	2.67342e+07	2.72333e+07	2.85331e+07	7046.28	-36731.5	29685.2
-699.29	-761.127	1992.56	2.1906e+07	2.49743e+07	1.9987e+07	2.66268e+07	2.72369e+07	2.85184e+07	8004.16	-36855.9	28851.8
-761.127	-829.084	2019.98	2.19381e+07	2.50456e+07	2.00018e+07	2.65187e+07	2.72426e+07	2.85017e+07	9489.95	-36347.4	26857.4
-829.084	-902.827	2057.02	2.19704e+07	2.51161e+07	2.0009e+07	2.64155e+07	2.72441e+07	2.84828e+07	10694.5	-36117.6	25423.1
-902.827	-975.937	2091.59	2.2004e+07	2.51883e+07	2.00162e+07	2.63162e+07	2.72444e+07	2.84648e+07	11518.2	-36271.7	24753.5
-975.937	-1048.49	2123.91	2.20407e+07	2.52642e+07	2.00309e+07	2.62179e+07	2.72474e+07	2.84489e+07	12547.4	-36155	23607.6
-1048.49	-1120.31	2153.77	2.20818e+07	2.53389e+07	2.00483e+07	2.61176e+07	2.72456e+07	2.84347e+07	13466	-36122.5	22656.5
-1120.31	-1191.37	2181.19	2.21291e+07	2.54092e+07	2.00704e+07	2.60103e+07	2.7236e+07	2.84225e+07	14441.2	-35983.6	21542.5
-1191.37	-1261.56	2206.07	2.2175e+07	2.54838e+07	2.00951e+07	2.59104e+07	2.72321e+07	2.84122e+07	15380.9	-35842.5	20461.6
-1261.56	-1330.81	2228.41	2.22223e+07	2.55579e+07	2.01227e+07	2.58111e+07	2.72276e+07	2.84041e+07	16332	-35644.2	19312.2
-1330.81	-1399.05	2248.13	2.22694e+07	2.56336e+07	2.01522e+07	2.57159e+07	2.72252e+07	2.83982e+07	17266.7	-35419.5	18152.8
-1399.05	-1466.22	2265.22	2.23165e+07	2.57096e+07	2.01832e+07	2.56235e+07	2.7224e+07	2.83946e+07	18197.2	-35153.5	16956.3
-1466.22	-1529.88	2275.21	2.23632e+07	2.57858e+07	2.02151e+07	2.55344e+07	2.72242e+07	2.83935e+07	18919.7	-35074.5	16154.8
-1529.88	-1590.06	2278.26	2.24095e+07	2.58626e+07	2.02484e+07	2.54483e+07	2.72264e+07	2.83947e+07	19735.3	-34842.1	15106.8
-1590.06	-1649.05	2278.76	2.24551e+07	2.59388e+07	2.02818e+07	2.5365e+07	2.72299e+07	2.8398e+07	20675.3	-34421.7	13746.4
-1649.05	-1706.71	2276.61	2.24997e+07	2.60144e+07	2.03141e+07	2.52856e+07	2.7235e+07	2.84039e+07	21523.6	-34054.6	12531
-1706.71	-1763.02	2271.87	2.25433e+07	2.60886e+07	2.03452e+07	2.52094e+07	2.72412e+07	2.84122e+07	22393.3	-33611.7	11218.4
-1763.02	-1817.9	2264.52	2.25857e+07	2.61617e+07	2.03744e+07	2.5137e+07	2.72491e+07	2.84233e+07	23221.3	-33164.8	9943.45
-1817.9	-1871.31	2254.59	2.26269e+07	2.62327e+07	2.04015e+07	2.50679e+07	2.72582e+07	2.84371e+07	24039.5	-32676.8	8637.28
-1871.31	-1923.17	2242.09	2.26666e+07	2.6302e+07	2.04261e+07	2.50028e+07	2.7269e+07	2.84539e+07	24829.6	-32170.3	7340.74
-1923.17	-1973.42	2227.1	2.27049e+07	2.63687e+07	2.04479e+07	2.4941e+07	2.72811e+07	2.84738e+07	25601.2	-31635.9	6034.66
-1973.42	-2021.95	2209.67	2.27416e+07	2.6433e+07	2.04665e+07	2.48832e+07	2.7295e+07	2.84968e+07	26351.8	-31083.1	4731.31
-2021.95	-2062.23	2180.28	2.27768e+07	2.64941e+07	2.04817e+07	2.48288e+07	2.73103e+07	2.85231e+07	26784.7	-31110.3	4325.61
-2062.23	-2093.39	2140.33	2.28107e+07	2.65568e+07	2.05009e+07	2.47754e+07	2.73299e+07	2.85472e+07	27535	-30890.1	3355.05
-2093.39	-2120.02	2101.1	2.28435e+07	2.66169e+07	2.05187e+07	2.47253e+07	2.73516e+07	2.85699e+07	28695.3	-30338.3	1642.96
-2120.02	-2141.8	2062.54	2.2875e+07	2.66717e+07	2.0529e+07	2.46833e+07	2.73738e+07	2.8595e+07	29622.4	-29957.5	335.137
-2141.8	-2159.98	2023.7	2.29043e+07	2.67215e+07	2.05353e+07	2.4647e+07	2.73967e+07	2.86211e+07	30407.2	-29346.6	-1060.66
-2159.98	-2175.42	1983.68	2.29309e+07	2.67644e+07	2.05373e+07	2.46155e+07	2.74192e+07	2.86488e+07	31049	-28749.1	-2299.87
-2175.42	-2188.62	1942.15	2.29546e+07	2.67994e+07	2.05368e+07	2.45856e+07	2.74408e+07	2.86769e+07	31629.1	-28077.3	-3551.75
-2188.62	-2199.81	1898.87	2.29757e+07	2.68269e+07	2.05336e+07	2.45574e+07	2.74619e+07	2.87053e+07	32142.5	-27400.9	-4741.63
-2199.81	-2209.15	1853.8	2.29948e+07	2.68474e+07	2.05277e+07	2.45311e+07	2.74823e+07	2.87339e+07	32611.9	-26694.2	-5917.7
-2209.15	-2216.69	1806.9	2.3012e+07	2.68617e+07	2.05191e+07	2.45072e+07	2.75023e+07	2.87627e+07	33036.1	-25978.7	-7057.41
-2216.69	-2207.96	1750.69	2.30275e+07	2.68696e+07	2.05083e+07	2.44853e+07	2.75217e+07	2.87917e+07	34079.4	-26605.1	-7474.31
-2207.96	-2183.5	1685.53	2.3042e+07	2.68807e+07	2.04993e+07	2.44702e+07	2.75411e+07	2.88162e+07	34735.4	-26496.2	-8239.13
-2183.5	-2157.77	1618.92	2.30539e+07	2.68877e+07	2.04906e+07	2.44593e+07	2.75576e+07	2.8837e+07	34887.1	-25411.6	-9475.52
-2157.77	-2130.44	1550.76	2.30622e+07	2.68841e+07	2.048e+07	2.44498e+07	2.75699e+07	2.88566e+07	35257	-24847.7	-10409.3
-2130.44	-2101.72	1481.21	2.30672e+07	2.68739e+07	2.04694e+07	2.44426e+07	2.75782e+07	2.88734e+07	35456.4	-23997.6	-11458.8
-2101.72	-2071.52	1410.29	2.30689e+07	2.68559e+07	2.04586e+07	2.44371e+07	2.75821e+07	2.88882e+07	35695.1	-23298	-12397.2
-2071.52	-2039.91	1338.09	2.30672e+07	2.68314e+07	2.04485e+07	2.4433e+07	2.75813e+07	2.89004e+07	35860.4	-22513.5	-13346.9
-2039.91	-2006.87	1264.69	2.30697e+07	2.68169e+07	2.04394e+07	2.44415e+07	2.75755e+07	2.89103e+07	36013.2	-21771.9	-14241.3
-2006.87	-1972.42	1190.17	2.30716e+07	2.68012e+07	2.04317e+07	2.44535e+07	2.75644e+07	2.89176e+07	36120.9	-21004.3	-15116.6
-1972.42	-1936.58	1114.59	2.30703e+07	2.67791e+07	2.0426e+07	2.44642e+07	2.75481e+07	2.89222e+07	36201.4	-20248.1	-15953.2
-1936.58	-1899.34	1038.05	2.30672e+07	2.6754e+07	2.04226e+07	2.44757e+07	2.7526e+07	2.8924e+07	36245.1	-19483	-16762.1
-1899.34	-1875.59	968.188	2.30614e+07	2.67251e+07	2.04219e+07	2.44866e+07	2.74982e+07	2.89231e+07	35579.3	-17333.1	-18246.2
-1875.59	-1864.76	904.795	2.30472e+07	2.6664e+07	2.04155e+07	2.44863e+07	2.74757e+07	2.89365e+07	35241.5	-15922.3	-19319.2
-1864.76	-1852.12	840.391	2.30319e+07	2.65915e+07	2.04065e+07	2.44805e+07	2.74621e+07	2.89595e+07	35354.2	-15496.4	-19857.8
-1852.12	-1838.01	775.233	2.30224e+07	2.65318e+07	2.03998e+07	2.44773e+07	2.74524e+07	2.89813e+07	35170.3	-14527	-20643.3
-1838.01	-1822.23	709.284	2.30052e+07	2.64722e+07	2.03981e+07	2.44636e+07	2.745e+07	2.89943e+07	35093	-13839.1	-21253.9
-1822.23	-1804.9	642.665	2.2992e+07	2.64192e+07	2.03963e+07	2.44518e+07	2.74529e+07	2.90093e+07	34905.6	-12986.5	-21919.2
-1804.9	-1785.95	575.417	2.29801e+07	2.63691e+07	2.03942e+07	2.44398e+07	2.74624e+07	2.9026e+07	34725.7	-12209.6	-22516.1
-1785.95	-1765.43	507.629	2.29707e+07	2.63235e+07	2.03918e+07	2.44288e+07	2.74779e+07	2.9044e+07	34491	-11377.8	-23113.2
-1765.43	-1743.31	439.386	2.29632e+07	2.62811e+07	2.03888e+07	2.44184e+07	2.74998e+07	2.90632e+07	34236.5	-10560.4	-23676.1
-1743.31	-1719.65	370.813	2.29575e+07	2.62423e+07	2.0385e+07	2.4409e+07	2.75278e+07	2.90829e+07	33945.5	-9717.88	-24227.6
-1719.65	-1682.78	296.366	2.29534e+07	2.62066e+07	2.03802e+07	2.44007e+07	2.7562e+07	2.91029e+07	34190.3	-9962.16	-24228.1
-1682.78	-1633.52	217.07	2.29584e+07	2.61967e+07	2.03781e+07	2.43991e+07	2.75845e+07	2.91084e+07	34133.6	-9572.16	-24561.4
-1633.52	-1584.33	140.186	2.29651e+07	2.61979e+07	2.03785e+07	2.44e+07	2.75962e+07	2.91049e+07	33700.5	-8338.5	-25362
-1584.33	-1536.18	68.0296	2.29659e+07	2.61931e+07	2.03798e+07	2.43988e+07	2.7607e+07	2.91018e+07	33534.8	-7429.08	-26105.7
-1536.18	-1491.29	2.47866	2.29652e+07	2.6191e+07	2.03821e+07	2.43978e+07	2.76118e+07	2.90956e+07	35275.5	-6137.86	-29137.6
-1491.29	-1450.65	-53.7836	2.29765e+07	2.61869e+07	2.0384e+07	2.44028e+07	2.76145e+07	2.91086e+07	34900.6	-4934.19	-29966.4
-1450.65	-1412.7	-102.155	2.29968e+07	2.61837e+07	2.03864e+07	2.44113e+07	2.76136e+07	2.91336e+07	34751.2	-3813.88	-30937.3
-1412.7	-1375.42	-146.597	2.30156e+07	2.61811e+07	2.03897e+07	2.44183e+07	2.76098e+07	2.91587e+07	34295.8	-2824.68	-31471.1
-1375.42	-1337.87	-188.761	2.30318e+07	2.61803e+07	2.03933e+07	2.44232e+07	2.76024e+07	2.91817e+07	33865.9	-1839.72	-32026.2
-1337.87	-1299.5	-228.825	2.30456e+07	2.61809e+07	2.0397e+07	2.44258e+07	2.75917e+07	2.92031e+07	32600.2	-886.526	-31713.7
-1299.5	-1269.04	-273.141	2.30504e+07	2.61834e+07	2.03995e+07	2.44242e+07	2.75774e+07	2.92156e+07	29036	913.002	-29949
-1269.04	-1245.84	-323.94	2.30201e+07	2.61765e+07	2.03989e+07	2.44136e+07	2.75741e+07	2.91993e+07	28561.1	2245.28	-30806.3
-1245.84	-1220.73	-374.978	2.2991e+07	2.61664e+07	2.04005e+07	2.44065e+07	2.75787e+07	2.91816e+07	27910.1	2981.5	-30891.6
-1220.73	-1193.87	-426.035	2.29693e+07	2.61605e+07	2.04037e+07	2.44048e+07	2.7583e+07	2.91595e+07	27308	4054.23	-31362.2
-1193.87	-1165.11	-477.269	2.29516e+07	2.61544e+07	2.04087e+07	2.44081e+07	2.75916e+07	2.91351e+07	26637.2	4959.72	-31596.9
-1165.11	-1134.49	-528.598	2.29391e+07	2.61497e+07	2.04152e+07	2.44172e+07	2.76018e+07	2.91078e+07	25961.4	5970	-31931.4
-1134.49	-1101.96	-580.051	2.29307e+07	2.61449e+07	2.04231e+07	2.4432e+07	2.76152e+07	2.90784e+07	25248.3	6937.03	-32185.3
-1101.96	-1067.53	-631.581	2.29263e+07	2.61401e+07	2.04322e+07	2.44531e+07	2.76309e+07	2.90471e+07	24515.9	7939.65	-32455.6
-1067.53	-1031.17	-683.173	2.29255e+07	2.61347e+07	2.04425e+07	2.44806e+07	2.76495e+07	2.90142e+07	23756.1	8933.51	-32689.6
-1031.17	-992.907	-734.789	2.29278e+07	2.61284e+07	2.04537e+07	2.45147e+07	2.76706e+07	2.89802e+07	22974.1	9940.81	-32914.9
-992.907	-949.752	-783.639	2.29329e+07	2.61207e+07	2.04657e+07	2.45558e+07	2.76946e+07	2.89454e+07	22703.7	10669.7	-33373.4
-949.752	-901.821	-829.787	2.29485e+07	2.61142e+07	2.04798e+07	2.46017e+07	2.77153e+07	2.89146e+07	22125.3	11551.6	-33676.9
-901.821	-852.078	-875.958	2.29682e+07	2.61074e+07	2.04938e+07	2.46509e+07	2.77342e+07	2.8886e+07	21143.2	12630.3	-33773.5
-852.078	-800.469	-922.052	2.29849e+07	2.60983e+07	2.0506e+07	2.4704e+07	2.77553e+07	2.88565e+07	20349.4	13600.7	-33950.1
-800.469	-747.054	-968.061	2.30019e+07	2.60875e+07	2.05174e+07	2.47606e+07	2.77767e+07	2.8828e+07	19427.5	14624.5	-34052.1
-747.054	-691.839	-1013.92	2.30172e+07	2.60744e+07	2.05274e+07	2.4821e+07	2.77994e+07	2.87998e+07	18548.9	15611.9	-34160.8
-691.839	-634.868	-1059.61	2.30318e+07	2.60591e+07	2.05363e+07	2.48851e+07	2.7823e+07	2.87726e+07	17623.1	16608.5	-34231.6
-634.868	-576.177	-1105.05	2.30449e+07	2.60414e+07	2.05439e+07	2.49529e+07	2.78476e+07	2.87464e+07	16699.9	17587.2	-34287.2
-576.177	-515.819	-1150.2	2.30568e+07	2.60213e+07	2.05506e+07	2.50243e+07	2.78732e+07	2.87214e+07	15754.3	18560.1	-34314.4
-515.819	-453.866	-1195.01	2.30673e+07	2.59987e+07	2.05561e+07	2.50992e+07	2.78993e+07	2.86977e+07	14800.6	19519	-34319.6
-453.866	-389.45	-1238.44	2.30765e+07	2.59738e+07	2.05608e+07	2.51773e+07	2.79254e+07	2.86753e+07	14009.4	20377.3	-34386.7
-389.45	-322.792	-1280.41	2.30893e+07	2.59478e+07	2.05662e+07	2.52553e+07	2.79472e+07	2.86564e+07	13109.6	21276.1	-34385.7
-322.792	-255.172	-1321.69	2.31028e+07	2.59211e+07	2.05708e+07	2.53321e+07	2.79644e+07	2.86395e+07	12064.3	22239.2	-34303.5
-255.172	-187.112	-1361.93	2.31139e+07	2.58941e+07	2.05731e+07	2.54084e+07	2.79767e+07	2.86228e+07	11063.6	23181.2	-34244.8
-187.112	-119.605	-1400.62	2.31243e+07	2.58679e+07	2.05747e+07	2.54826e+07	2.79825e+07	2.86074e+07	9987.18	24186.1	-34173.3
-119.605	-54.3433	-1436.88	2.31321e+07	2.58426e+07	2.05764e+07	2.5555e+07	2.79847e+07	2.85941e+07	8867.37	25274.6	-34142
-54.3433	6.02885	-1469.33	2.31372e+07	2.58184e+07	2.05798e+07	2.56259e+07	2.79856e+07	2.85839e+07	7644.23	26523.3	-34167.5
6.02885	60.6307	-1497.51	2.31386e+07	2.5795e+07	2.05855e+07	2.56961e+07	2.79887e+07	2.85775e+07	6429.18	27728.7	-34157.8
60.6307	111.529	-1522.45	2.31368e+07	2.57723e+07	2.05935e+07	2.57662e+07	2.79949e+07	2.85748e+07	5300.84	28717.9	-34018.7
111.529	160.794	-1545.2	2.31326e+07	2.57499e+07	2.06031e+07	2.58359e+07	2.80032e+07	2.85752e+07	4221.09	29575.8	-33796.9
160.794	209.492	-1566.27	2.31264e+07	2.57278e+07	2.06139e+07	2.59052e+07	2.80129e+07	2.85783e+07	3165.48	30349.7	-33515.2
209.492	268.45	-1606.53	2.31187e+07	2.57061e+07	2.0626e+07	2.5974e+07	2.80238e+07	2.85839e+07	1160.81	30102.6	-31263.4
268.45	337.946	-1665.51	2.31062e+07	2.56824e+07	2.06214e+07	2.60461e+07	2.80179e+07	2.85833e+07	-299.769	30282.8	-29983
337.946	408.184	-1722.86	2.3091e+07	2.56569e+07	2.06061e+07	2.61205e+07	2.79985e+07	2.85806e+07	-1059.05	31091.8	-30032.7
408.184	479.257	-1778.97	2.30758e+07	2.56334e+07	2.06011e+07	2.61951e+07	2.79862e+07	2.85856e+07	-2199.89	31506.6	-29306.7
479.257	550.905	-1833.47	2.30592e+07	2.56146e+07	2.06119e+07	2.62707e+07	2.7988e+07	2.85999e+07	-3139.55	32076	-28936.4
550.905	623.087	-1886.44	2.30418e+07	2.55995e+07	2.06319e+07	2.63467e+07	2.79948e+07	2.86206e+07	-4187.78	32499.7	-28311.9
623.087	695.659	-1937.71	2.30232e+07	2.5586e+07	2.06532e+07	2.64232e+07	2.79986e+07	2.86449e+07	-5177.15	32937.9	-27760.7
695.659	768.54	-1987.25	2.30035e+07	2.55756e+07	2.06799e+07	2.64998e+07	2.80035e+07	2.86742e+07	-6195.5	33302.1	-27106.6
768.54	841.617	-2034.98	2.29826e+07	2.55676e+07	2.07096e+07	2.65766e+07	2.80074e+07	2.87079e+07	-7194.65	33639.1	-26444.5
841.617	914.797	-2080.83	2.29605e+07	2.55626e+07	2.07433e+07	2.66532e+07	2.80114e+07	2.87464e+07	-8198.78	33922.6	-25723.8
914.797	991.935	-2132.2	2.2937e+07	2.55604e+07	2.07804e+07	2.67296e+07	2.8015e+07	2.87895e+07	-9522.28	33796.9	-24274.6
991.935	1072.78	-2188.75	2.29099e+07	2.556e+07	2.08138e+07	2.68095e+07	2.80142e+07	2.88373e+07	-10666.6	33822.4	-23155.7
1072.78	1153.29	-2242.94	2.288e+07	2.5563e+07	2.08484e+07	2.68917e+07	2.80109e+07	2.88918e+07	-11568.1	34066.8	-22498.7
1153.29	1233.47	-2294.9	2.28485e+07	2.5571e+07	2.08897e+07	2.69738e+07	2.80084e+07	2.8954e+07	-12591.3	34121.6	-21530.3
1233.47	1313.17	-2344.47	2.28145e+07	2.55831e+07	2.0934e+07	2.70569e+07	2.8005e+07	2.90235e+07	-13540.1	34208.4	-20668.3
1313.17	1392.32	-2391.64	2.27782e+07	2.55996e+07	2.09826e+07	2.71402e+07	2.80018e+07	2.91006e+07	-14518	34207.8	-19689.8
1392.32	1470.81	-2436.32	2.27392e+07	2.56203e+07	2.10339e+07	2.72237e+07	2.79985e+07	2.91853e+07	-15468.8	34185.4	-18716.6
1470.81	1548.56	-2478.48	2.26973e+07	2.56452e+07	2.1088e+07	2.73072e+07	2.79954e+07	2.92776e+07	-16421.2	34106.8	-17685.7
1548.56	1625.48	-2518.06	2.26523e+07	2.56739e+07	2.11439e+07	2.73905e+07	2.79924e+07	2.93777e+07	-17358.8	33992.1	-16633.3
1625.48	1701.48	-2555.03	2.26041e+07	2.57064e+07	2.12013e+07	2.74734e+07	2.79899e+07	2.94854e+07	-18289	33831.9	-15543
1701.48	1759.74	-2557.74	2.25524e+07	2.57424e+07	2.12594e+07	2.75557e+07	2.7988e+07	2.96009e+07	-17820	35194.4	-17374.3
1759.74	1800.84	-2527.39	2.25021e+07	2.57893e+07	2.13427e+07	2.76234e+07	2.79971e+07	2.9715e+07	-18084.5	35676	-17591.5
1800.84	1841.35	-2495.46	2.24522e+07	2.58392e+07	2.14342e+07	2.76804e+07	2.80111e+07	2.98244e+07	-19333.1	35011	-15677.9
1841.35	1880.76	-2461.2	2.24004e+07	2.58842e+07	2.15147e+07	2.77348e+07	2.80221e+07	2.99327e+07	-20028.3	34918.3	-14889.9
1880.76	1919.23	-2425.02	2.23484e+07	2.59284e+07	2.15949e+07	2.77812e+07	2.8034e+07	3.0037e+07	-20994.3	34470.8	-13476.5
1919.23	1956.55	-2386.74	2.2296e+07	2.59691e+07	2.16694e+07	2.78208e+07	2.80442e+07	3.01383e+07	-21791.4	34173.6	-12382.2
1956.55	1992.67	-2346.52	2.22441e+07	2.60073e+07	2.17417e+07	2.78512e+07	2.80538e+07	3.02351e+07	-22660.7	33758.9	-11098.3
1992.67	2027.37	-2304.45	2.21929e+07	2.6043e+07	2.18095e+07	2.78738e+07	2.80626e+07	3.03276e+07	-23485.1	33380.5	-9895.43
2027.37	2060.33	-2260.83	2.21428e+07	2.60738e+07	2.1873e+07	2.7886e+07	2.80694e+07	3.04154e+07	-24353.7	32971.4	-8617.68
2060.33	2090.93	-2216.2	2.20945e+07	2.60837e+07	2.19317e+07	2.78728e+07	2.8065e+07	3.04987e+07	-25270.6	32597.3	-7326.71
2090.93	2122.54	-2177.16	2.20455e+07	2.60996e+07	2.19853e+07	2.78646e+07	2.80663e+07	3.05777e+07	-26430	31855.1	-5425.13
2122.54	2154.13	-2144.28	2.1995e+07	2.61148e+07	2.20336e+07	2.78574e+07	2.80694e+07	3.06527e+07	-27580.8	31360.3	-3779.49
2154.13	2181.4	-2111.81	2.19415e+07	2.61306e+07	2.20763e+07	2.78565e+07	2.80747e+07	3.07245e+07	-28565.9	31105.9	-2540.04
2181.4	2205.37	-2079.03	2.18844e+07	2.61388e+07	2.21132e+07	2.7855e+07	2.80779e+07	3.07936e+07	-29439.9	30606.6	-1166.73
2205.37	2226.84	-2045.04	2.1823e+07	2.61412e+07	2.21451e+07	2.78546e+07	2.80797e+07	3.08601e+07	-30178.5	30129	49.4886
2226.84	2246.29	-2009.5	2.17571e+07	2.61368e+07	2.21725e+07	2.78543e+07	2.80791e+07	3.0924e+07	-30871.3	29570.9	1300.42
2246.29	2266.6	-1972.25	2.16873e+07	2.61314e+07	2.21957e+07	2.78593e+07	2.80779e+07	3.09855e+07	-33732.1	31224.5	2507.58
2266.6	2286.05	-1933.16	2.162e+07	2.6161e+07	2.22146e+07	2.7902e+07	2.80867e+07	3.10446e+07	-33161.9	29454.7	3707.16
2286.05	2300.81	-1892.02	2.15461e+07	2.61639e+07	2.22297e+07	2.79235e+07	2.80858e+07	3.11013e+07	-32152.2	27280.6	4871.56
2300.81	2313.48	-1848.92	2.14664e+07	2.61505e+07	2.22412e+07	2.79344e+07	2.80788e+07	3.11557e+07	-33554.3	27515.8	6038.51
2313.48	2308.8	-1795.6	2.13842e+07	2.61375e+07	2.2249e+07	2.795e+07	2.80694e+07	3.12078e+07	-34347.4	27937.3	6410.1
2308.8	2286.89	-1732.43	2.12967e+07	2.60959e+07	2.22441e+07	2.79509e+07	2.80541e+07	3.12686e+07	-35427.2	28244.7	7182.51
2286.89	2264.05	-1667.71	2.12083e+07	2.60461e+07	2.22311e+07	2.79463e+07	2.80398e+07	3.13363e+07	-35576.1	27087.9	8488.2
2264.05	2239.75	-1601.28	2.11209e+07	2.60028e+07	2.22164e+07	2.79416e+07	2.8029e+07	3.14043e+07	-36182.5	26712	9470.55
2239.75	2214.29	-1533.31	2.1034e+07	2.59588e+07	2.21968e+07	2.79347e+07	2.8021e+07	3.14762e+07	-36497.5	25905.3	10592.1
2214.29	2187.51	-1463.82	2.09483e+07	2.5918e+07	2.2174e+07	2.7927e+07	2.80164e+07	3.15499e+07	-36922	25321.9	11600.1
2187.51	2159.5	-1392.89	2.08638e+07	2.58781e+07	2.21472e+07	2.79181e+07	2.80151e+07	3.16264e+07	-37238.6	24608.7	12629.9
2159.5	2130.21	-1320.57	2.07809e+07	2.58403e+07	2.21168e+07	2.79084e+07	2.80174e+07	3.17052e+07	-37561.8	23955.6	13606.2
2130.21	2099.67	-1246.96	2.06998e+07	2.58039e+07	2.20828e+07	2.78981e+07	2.80234e+07	3.17864e+07	-37828.3	23259.9	14568.4
2099.67	2067.85	-1172.1	2.06208e+07	2.57694e+07	2.20453e+07	2.78874e+07	2.80331e+07	3.18697e+07	-38069.6	22576.1	15493.5
2067.85	2034.77	-1096.09	2.05443e+07	2.57363e+07	2.20044e+07	2.78764e+07	2.80466e+07	3.19552e+07	-38266.9	21874.1	16392.8
2034.77	2015.5	-1026.7	2.04705e+07	2.5705e+07	2.19604e+07	2.78652e+07	2.80641e+07	3.20426e+07	-37739	19760.4	17978.6
2015.5	2009.47	-963.708	2.03994e+07	2.56741e+07	2.1913e+07	2.78536e+07	2.80859e+07	3.21324e+07	-37536.8	18389.9	19146.9
2009.47	2001.69	-899.52	2.03317e+07	2.56449e+07	2.18627e+07	2.78419e+07	2.8112e+07	3.2224e+07	-37783.8	18012.7	19771.1
2001.69	1992.49	-834.402	2.02676e+07	2.56177e+07	2.18099e+07	2.78306e+07	2.81424e+07	3.23168e+07	-37720	17075.7	20644.2
1992.49	1981.66	-768.322	2.02072e+07	2.55921e+07	2.17546e+07	2.78195e+07	2.8177e+07	3.24106e+07	-37753	16416.3	21336.6
1981.66	1969.28	-701.409	2.01509e+07	2.55684e+07	2.16973e+07	2.78087e+07	2.82158e+07	3.2505e+07	-37662.3	15581.8	22080.5
1969.28	1955.27	-633.709	2.00986e+07	2.55466e+07	2.16383e+07	2.77981e+07	2.82585e+07	3.2599e+07	-37565.5	14815.4	22750.1
1955.27	1939.65	-565.318	2.00506e+07	2.55269e+07	2.15783e+07	2.77878e+07	2.83048e+07	3.26916e+07	-37399.1	13985.1	23414
1939.65	1922.38	-496.317	2.00067e+07	2.55096e+07	2.15182e+07	2.77774e+07	2.83542e+07	3.27807e+07	-37196.7	13160.8	24035.8
1922.38	1903.47	-426.817	1.99671e+07	2.54954e+07	2.1459e+07	2.77668e+07	2.84054e+07	3.28637e+07	-36941.2	12303.6	24637.5
1903.47	1886.97	-358.98	1.99316e+07	2.5485e+07	2.14025e+07	2.77558e+07	2.84572e+07	3.29372e+07	-36454.2	11055	25399.2
1886.97	1872.74	-292.871	1.99083e+07	2.54852e+07	2.13477e+07	2.7752e+07	2.8503e+07	3.3006e+07	-36020.6	9983.94	26036.6
1872.74	1856.81	-224.783	1.98918e+07	2.54895e+07	2.12948e+07	2.77516e+07	2.85433e+07	3.30716e+07	-37369.4	9159.98	28209.5
1856.81	1839.44	-155.314	1.98889e+07	2.54919e+07	2.12421e+07	2.77588e+07	2.85813e+07	3.31498e+07	-37147.7	8152.61	28995.1
1839.44	1821	-87.029	1.98925e+07	2.54953e+07	2.11925e+07	2.7768e+07	2.86151e+07	3.32265e+07	-36618.8	7173.52	29445.3
1821	1802.17	-21.4059	1.98985e+07	2.5498e+07	2.11466e+07	2.77762e+07	2.86462e+07	3.32983e+07	-36258.1	6082.87	30175.3
1802.17	1783.69	40.13	1.99095e+07	2.55008e+07	2.11039e+07	2.77852e+07	2.86742e+07	3.33688e+07	-35810.2	4948.86	30861.3
1783.69	1765.27	98.0053	1.99241e+07	2.55028e+07	2.10641e+07	2.77941e+07	2.87002e+07	3.34382e+07	-35337.6	3830.78	31506.8
1765.27	1745.96	153.923	1.99425e+07	2.55049e+07	2.10268e+07	2.78029e+07	2.87241e+07	3.35066e+07	-34728.7	2761.37	31967.3
1745.96	1725.23	208.82	1.99634e+07	2.55075e+07	2.09918e+07	2.78109e+07	2.87458e+07	3.35724e+07	-34097.3	1688.01	32409.2
1725.23	1703.66	262.004	1.99868e+07	2.55109e+07	2.09589e+07	2.78182e+07	2.8765e+07	3.36356e+07	-31572.6	534.659	31037.9
1703.66	1681.01	313.839	1.99988e+07	2.55157e+07	2.09257e+07	2.78191e+07	2.87811e+07	3.36785e+07	-30554.6	-583.752	31138.4
1681.01	1656.28	365.564	2.00103e+07	2.55216e+07	2.08927e+07	2.78181e+07	2.8794e+07	3.37167e+07	-29924.4	-1651.02	31575.4
1656.28	1629.42	417.346	2.0023e+07	2.55282e+07	2.08599e+07	2.78158e+07	2.88043e+07	3.37527e+07	-29027	-2762.58	31789.6
1629.42	1600.4	469.124	2.00356e+07	2.55355e+07	2.08269e+07	2.78118e+07	2.88117e+07	3.37848e+07	-28217.8	-3867.18	32085
1600.4	1569.18	520.926	2.00487e+07	2.55434e+07	2.07936e+07	2.78061e+07	2.88163e+07	3.38137e+07	-27310	-4990.56	32300.6
1569.18	1535.75	572.708	2.00616e+07	2.55518e+07	2.07598e+07	2.77986e+07	2.88182e+07	3.38388e+07	-26407	-6117.38	32524.4
1535.75	1500.11	624.452	2.00745e+07	2.55604e+07	2.07252e+07	2.77894e+07	2.88174e+07	3.38603e+07	-25456.9	-7253.25	32710.1
1500.11	1462.25	676.119	2.0087e+07	2.55692e+07	2.06896e+07	2.77783e+07	2.8814e+07	3.38781e+07	-24490.5	-8392.97	32883.4
1462.25	1422.18	727.678	2.00991e+07	2.5578e+07	2.06527e+07	2.77653e+07	2.88082e+07	3.38922e+07	-23494.8	-9536.24	33031
1422.18	1372.79	772.486	2.01106e+07	2.55866e+07	2.06144e+07	2.77504e+07	2.88001e+07	3.39025e+07	-23760.2	-10016.4	33776.6
1372.79	1314.34	810.756	2.01246e+07	2.5596e+07	2.05749e+07	2.77334e+07	2.87874e+07	3.39111e+07	-23319.4	-10850.2	34169.6
1314.34	1253.92	849.056	2.01385e+07	2.56056e+07	2.05333e+07	2.77132e+07	2.8771e+07	3.39169e+07	-21945.9	-12154.5	34100.4
1253.92	1191.4	887.209	2.01496e+07	2.56143e+07	2.04887e+07	2.76899e+07	2.87527e+07	3.39186e+07	-21055.3	-13195.3	34250.6
1191.4	1126.88	925.257	2.01595e+07	2.56226e+07	2.04415e+07	2.76634e+07	2.87316e+07	3.3917e+07	-19889.7	-14365.2	34255
1126.88	1060.37	963.123	2.01673e+07	2.56301e+07	2.03912e+07	2.76337e+07	2.87086e+07	3.39118e+07	-18859.5	-15449.4	34308.9
1060.37	991.921	1000.79	2.01735e+07	2.56368e+07	2.0338e+07	2.76008e+07	2.86835e+07	3.39032e+07	-17746.5	-16560.9	34307.4
991.921	921.576	1038.22	2.0178e+07	2.56425e+07	2.02816e+07	2.75649e+07	2.86568e+07	3.38913e+07	-16670.8	-17635.4	34306.2
921.576	849.389	1075.37	2.01809e+07	2.56473e+07	2.02222e+07	2.75258e+07	2.86286e+07	3.38762e+07	-15570	-18705	34275
849.389	775.411	1112.21	2.01823e+07	2.56509e+07	2.01596e+07	2.74836e+07	2.85991e+07	3.3858e+07	-14480.2	-19749.3	34229.5
775.411	700.608	1149.52	2.01822e+07	2.56535e+07	2.0094e+07	2.74384e+07	2.85687e+07	3.38368e+07	-13221.7	-20860.9	34082.6
700.608	625.016	1187.24	2.01718e+07	2.56531e+07	2.00226e+07	2.73946e+07	2.85444e+07	3.38084e+07	-12054.8	-21903.6	33958.4
625.016	547.83	1224.47	2.01572e+07	2.56499e+07	1.99485e+07	2.73535e+07	2.85242e+07	3.37757e+07	-11003.4	-22865.2	33868.6
547.83	469.184	1261.17	2.01453e+07	2.56447e+07	1.98743e+07	2.73132e+07	2.85037e+07	3.37422e+07	-9892.06	-23836.1	33728.2
469.184	389.245	1297.23	2.01326e+07	2.5637e+07	1.97988e+07	2.7275e+07	2.84854e+07	3.37063e+07	-8813.62	-24770.9	33584.5
389.245	308.325	1332.49	2.01209e+07	2.56272e+07	1.97229e+07	2.72381e+07	2.84679e+07	3.36692e+07	-7713.99	-25703.2	33417.2
308.325	227.006	1366.64	2.01093e+07	2.56152e+07	1.96462e+07	2.72028e+07	2.84513e+07	3.36305e+07	-6610.31	-26639.2	33249.5
227.006	146.458	1399.08	2.00988e+07	2.56015e+07	1.9569e+07	2.71687e+07	2.84342e+07	3.35903e+07	-5467.71	-27628.1	33095.8
146.458	68.949	1428.65	2.00896e+07	2.55865e+07	1.94909e+07	2.7135e+07	2.84145e+07	3.35484e+07	-4254.36	-28746.1	33000.5
68.949	-1.62628	1453.35	2.00823e+07	2.5571e+07	1.94121e+07	2.71008e+07	2.839e+07	3.35049e+07	-2911.84	-30106.3	33018.2
-1.62628	-63.4595	1472.27	2.00749e+07	2.55559e+07	1.93352e+07	2.70669e+07	2.8366e+07	3.34618e+07	-1563.57	-31458.6	33022.1
-63.4595	-117.937	1483	2.00664e+07	2.55412e+07	1.92616e+07	2.70343e+07	2.83467e+07	3.34202e+07	-580.728	-32632.5	33213.2
-117.937	-168.143	1487.25	2.00634e+07	2.55265e+07	1.9201e+07	2.69977e+07	2.83379e+07	3.33861e+07	444.588	-33555.8	33111.2
-168.143	-216.913	1489.55	2.0063e+07	2.55106e+07	1.91448e+07	2.69575e+07	2.83365e+07	3.33532e+07	1592.22	-34285.8	32693.6
-216.913	-265.132	1490.26	2.00614e+07	2.54926e+07	1.90838e+07	2.69167e+07	2.83375e+07	3.33157e+07	2617.27	-34973.6	32356.3
-265.132	-313.318	1489.68	2.00611e+07	2.54729e+07	1.9023e+07	2.68738e+07	2.83428e+07	3.3276e+07	3669.28	-35574.2	31904.9
-313.318	-361.736	1487.92	2.00613e+07	2.54512e+07	1.89602e+07	2.68296e+07	2.83509e+07	3.32325e+07	4678.35	-36132.1	31453.7
-361.736	-410.53	1485.07	2.00631e+07	2.54279e+07	1.88974e+07	2.67838e+07	2.83622e+07	3.31857e+07	5687.4	-36633.8	30946.4
-410.53	-459.752	1481.12	2.00662e+07	2.5403e+07	1.88341e+07	2.67365e+07	2.8376e+07	3.31351e+07	6676.99	-37093.2	30416.2
-459.752	-509.402	1476.07	2.00712e+07	2.53768e+07	1.87712e+07	2.66877e+07	2.83924e+07	3.30807e+07	7659.11	-37505.6	29846.5
-509.402	-559.444	1469.9	2.00782e+07	2.53492e+07	1.87091e+07	2.66374e+07	2.84109e+07	3.30222e+07	8628.58	-37875.4	29246.8
-559.444	-602.965	1449.59	2.00873e+07	2.53208e+07	1.86482e+07	2.65856e+07	2.84313e+07	3.29595e+07	9017.04	-38839.6	29822.6
-602.965	-640.157	1415.59	2.01054e+07	2.5295e+07	1.86094e+07	2.65227e+07	2.84657e+07	3.28952e+07	9701.35	-39416.5	29715.2
-640.157	-677.739	1380.81	2.01298e+07	2.52675e+07	1.85783e+07	2.64506e+07	2.85079e+07	3.28218e+07	10785.5	-39494.1	28708.5
-677.739	-715.443	1344.88	2.01565e+07	2.52342e+07	1.85386e+07	2.6375e+07	2.85488e+07	3.2735e+07	11636.7	-39776.4	28139.8
-715.443	-753.254	1307.94	2.0188e+07	2.51976e+07	1.85002e+07	2.62931e+07	2.85923e+07	3.26361e+07	12594.5	-39882.3	27287.7
-753.254	-790.988	1269.89	2.02236e+07	2.51566e+07	1.84591e+07	2.62068e+07	2.86357e+07	3.2524e+07	13480.4	-40019	26538.6
-790.988	-828.497	1230.79	2.02641e+07	2.51121e+07	1.84185e+07	2.61154e+07	2.86796e+07	3.23988e+07	14396.8	-40077.2	25680.3
-828.497	-865.497	1190.73	2.03094e+07	2.50638e+07	1.83778e+07	2.60198e+07	2.87228e+07	3.22601e+07	15304.8	-40124	24819.2
-865.497	-901.541	1150	2.03596e+07	2.50124e+07	1.83383e+07	2.59203e+07	2.87653e+07	3.21077e+07	16257.9	-40139.7	23881.8
-901.541	-935.818	1109.18	2.04147e+07	2.49577e+07	1.82999e+07	2.58178e+07	2.88066e+07	3.19416e+07	17291.8	-40168.5	22876.7
-935.818	-976.991	1083.89	2.04743e+07	2.49003e+07	1.82632e+07	2.57138e+07	2.88466e+07	3.17618e+07	18903.8	-39303.7	20399.9
-976.991	-1024.09	1073.92	2.05353e+07	2.48343e+07	1.82119e+07	2.5617e+07	2.88764e+07	3.15728e+07	20272.8	-38897.1	18624.3
-1024.09	-1066.64	1065.19	2.05978e+07	2.47657e+07	1.81576e+07	2.55268e+07	2.89009e+07	3.13782e+07	21406.9	-39150.6	17743.7
-1066.64	-1104.39	1058.33	2.06622e+07	2.47002e+07	1.81127e+07	2.54413e+07	2.89261e+07	3.11778e+07	22719.7	-39012.8	16293.1
-1104.39	-1138.2	1052.04	2.0727e+07	2.46342e+07	1.80707e+07	2.53641e+07	2.89483e+07	3.09734e+07	23720.2	-38913	15192.8
-1138.2	-1169.21	1045.31	2.07922e+07	2.45681e+07	1.80361e+07	2.52931e+07	2.89679e+07	3.07648e+07	24656.9	-38612.6	13955.7
-1169.21	-1197.9	1037.43	2.08574e+07	2.45005e+07	1.80075e+07	2.52285e+07	2.8983e+07	3.0553e+07	25491.2	-38290.8	12799.7
-1197.9	-1224.59	1028.02	2.09221e+07	2.44314e+07	1.79859e+07	2.51697e+07	2.89934e+07	3.0338e+07	26287.9	-37875.8	11587.9
-1224.59	-1249.43	1016.79	2.09859e+07	2.43603e+07	1.79708e+07	2.51168e+07	2.89984e+07	3.01203e+07	27035.1	-37420.1	10385
-1249.43	-1272.52	1003.55	2.10484e+07	2.42872e+07	1.79623e+07	2.50692e+07	2.89974e+07	2.99003e+07	27752.7	-36904.9	9152.24
-1272.52	-1321.99	1003.04	2.11092e+07	2.42118e+07	1.79601e+07	2.50269e+07	2.899e+07	2.96781e+07	27203.7	-33724.9	6521.24
-1321.99	-1396.92	1014.43	2.11694e+07	2.41117e+07	1.79448e+07	2.49801e+07	2.89609e+07	2.94662e+07	27265.3	-31893.1	4627.81
-1396.92	-1469.46	1022.81	2.123e+07	2.40059e+07	1.79286e+07	2.49301e+07	2.89219e+07	2.92652e+07	28174.5	-31884.2	3709.71
-1469.46	-1540.19	1028.54	2.12915e+07	2.3914e+07	1.79256e+07	2.488e+07	2.88848e+07	2.90683e+07	28591.9	-30822	2230.06
-1540.19	-1611.23	1031.51	2.13544e+07	2.38253e+07	1.79271e+07	2.48269e+07	2.88445e+07	2.88789e+07	31397.9	-32415.1	1017.13
-1611.23	-1681.52	1031.8	2.14225e+07	2.37667e+07	1.79357e+07	2.47922e+07	2.88144e+07	2.86951e+07	31254	-30892.9	-361.072
-1681.52	-1749.15	1029.27	2.14932e+07	2.37096e+07	1.79481e+07	2.47515e+07	2.87817e+07	2.85184e+07	32062.2	-30401.5	-1660.65
-1749.15	-1813.93	1023.98	2.1568e+07	2.3664e+07	1.79648e+07	2.47135e+07	2.87515e+07	2.83483e+07	31885.5	-28870.3	-3015.15
-1813.93	-1873.56	1015.84	2.16453e+07	2.36198e+07	1.79845e+07	2.46706e+07	2.87206e+07	2.81855e+07	30611.5	-26272.2	-4339.32
-1873.56	-1930.12	1004.94	2.17218e+07	2.35659e+07	1.80069e+07	2.46143e+07	2.86868e+07	2.80299e+07	31969.5	-26282.1	-5687.34
-1930.12	-1961.9	979.798	2.18035e+07	2.35272e+07	1.80313e+07	2.45675e+07	2.86584e+07	2.78818e+07	32894	-26948.8	-5945.13
-1961.9	-1969.2	940.889	2.18872e+07	2.34958e+07	1.80601e+07	2.45219e+07	2.86332e+07	2.77382e+07	34004.1	-27225.9	-6778.2
-1969.2	-1974.72	899.759	2.19739e+07	2.34732e+07	1.80915e+07	2.44825e+07	2.8611e+07	2.76e+07	33930	-25562.3	-8367.68
-1974.72	-1977.75	856.164	2.20615e+07	2.34497e+07	1.81232e+07	2.44436e+07	2.85903e+07	2.74689e+07	34445.2	-24923.4	-9521.78
-1977.75	-1978.66	810.331	2.21513e+07	2.34302e+07	1.81561e+07	2.44086e+07	2.85722e+07	2.7344e+07	34593.7	-23712.1	-10881.6
-1978.66	-1977.25	762.243	2.22426e+07	2.34114e+07	1.81896e+07	2.43758e+07	2.85567e+07	2.7226e+07	34889.5	-22794.5	-12094.9
-1977.25	-1973.61	712.025	2.23356e+07	2.33945e+07	1.82237e+07	2.43462e+07	2.85442e+07	2.71146e+07	35055	-21706.6	-13348.5
-1973.61	-1967.71	659.734	2.24301e+07	2.33783e+07	1.82582e+07	2.43195e+07	2.8535e+07	2.701e+07	35239.3	-20702.4	-14536.9
-1967.71	-1959.6	605.476	2.25261e+07	2.33629e+07	1.82932e+07	2.42961e+07	2.85294e+07	2.69121e+07	35361.8	-19648	-15713.8
-1959.6	-1949.26	549.343	2.26236e+07	2.33476e+07	1.83285e+07	2.42757e+07	2.85276e+07	2.6821e+07	35465.7	-18618.7	-16847
-1949.26	-1936.76	491.452	2.27225e+07	2.33324e+07	1.83641e+07	2.42586e+07	2.85299e+07	2.67365e+07	35527.9	-17576.2	-17951.7
-1936.76	-1905.45	423.529	2.28226e+07	2.3317e+07	1.84001e+07	2.42449e+07	2.85364e+07	2.66587e+07	36333.1	-18099.1	-18234
-1905.45	-1856.13	346.285	2.29296e+07	2.33271e+07	1.84439e+07	2.42445e+07	2.854e+07	2.65733e+07	36701.3	-17775.6	-18925.7
-1856.13	-1805.71	268.759	2.30369e+07	2.33445e+07	1.8493e+07	2.4252e+07	2.85364e+07	2.64842e+07	36507.7	-16331.7	-20176
-1805.71	-1754.37	191.875	2.31382e+07	2.33485e+07	1.85432e+07	2.42603e+07	2.85279e+07	2.64002e+07	36614.7	-15460.2	-21154.5
-1754.37	-1703.42	117.846	2.32371e+07	2.33504e+07	1.85966e+07	2.42729e+07	2.85132e+07	2.63178e+07	36601.2	-14199.8	-22401.4
-1703.42	-1654.6	50.1046	2.33317e+07	2.33443e+07	1.86517e+07	2.4288e+07	2.84936e+07	2.62411e+07	36757.5	-12999.2	-23758.3
-1654.6	-1610.33	-6.81359	2.34234e+07	2.3333e+07	1.8708e+07	2.43068e+07	2.84694e+07	2.6172e+07	36974.8	-11563.4	-25411.3
-1610.33	-1570.81	-52.518	2.35117e+07	2.33144e+07	1.87637e+07	2.43291e+07	2.84427e+07	2.61154e+07	37135.1	-10250.5	-26884.6
-1570.81	-1533.81	-91.2181	2.35958e+07	2.32909e+07	1.88184e+07	2.4354e+07	2.8414e+07	2.60713e+07	37094.3	-9100.63	-27993.7
-1533.81	-1497.58	-126.236	2.36738e+07	2.32647e+07	1.88721e+07	2.43799e+07	2.8384e+07	2.6038e+07	36966.7	-8051.17	-28915.6
-1497.58	-1477.95	-169.861	2.37451e+07	2.3237e+07	1.89246e+07	2.44059e+07	2.83527e+07	2.60144e+07	34216.7	-5492.18	-28724.5
-1477.95	-1473.41	-223.417	2.37909e+07	2.31861e+07	1.8977e+07	2.44179e+07	2.83354e+07	2.5995e+07	32750.1	-3844.52	-28905.6
-1473.41	-1466.77	-277.361	2.38283e+07	2.31274e+07	1.90294e+07	2.44259e+07	2.83319e+07	2.59794e+07	33057.4	-3338.69	-29718.7
-1466.77	-1458.39	-334.478	2.38743e+07	2.30784e+07	1.90817e+07	2.44399e+07	2.8334e+07	2.59686e+07	34619.9	-2229.66	-32390.3
-1458.39	-1448.07	-393.506	2.39382e+07	2.30303e+07	1.91339e+07	2.44641e+07	2.83452e+07	2.59782e+07	33838.5	-1451.92	-32386.6
-1448.07	-1435.96	-452.743	2.39853e+07	2.29888e+07	1.91889e+07	2.44823e+07	2.83612e+07	2.59641e+07	33620.5	-498.037	-33122.5
-1435.96	-1422.01	-512.459	2.40377e+07	2.2951e+07	1.92467e+07	2.45052e+07	2.8382e+07	2.59502e+07	33097.3	355.81	-33453.1
-1422.01	-1406.25	-572.426	2.40916e+07	2.29166e+07	1.93081e+07	2.4532e+07	2.84068e+07	2.59315e+07	32661.3	1260.8	-33922.1
-1406.25	-1388.69	-632.687	2.41502e+07	2.28838e+07	1.93738e+07	2.45644e+07	2.84359e+07	2.59125e+07	32166.2	2135.69	-34301.9
-1388.69	-1369.39	-690.584	2.42129e+07	2.28525e+07	1.94441e+07	2.46025e+07	2.84688e+07	2.58922e+07	29409.9	3028.75	-32438.7
-1369.39	-1342.5	-741.746	2.42662e+07	2.28221e+07	1.95171e+07	2.46432e+07	2.85058e+07	2.58589e+07	30457.2	3365.77	-33823
-1342.5	-1308.22	-788.001	2.43605e+07	2.28029e+07	1.95974e+07	2.4698e+07	2.85348e+07	2.58542e+07	30061.1	3996.61	-34057.7
-1308.22	-1272.36	-834.409	2.44524e+07	2.27891e+07	1.96783e+07	2.47536e+07	2.85577e+07	2.58469e+07	29340.8	5014.16	-34355
-1272.36	-1234.78	-880.951	2.45398e+07	2.27736e+07	1.97609e+07	2.48095e+07	2.85809e+07	2.58439e+07	28754	5820.79	-34574.8
-1234.78	-1195.59	-927.549	2.46237e+07	2.27604e+07	1.98442e+07	2.48655e+07	2.86008e+07	2.58411e+07	28055	6739.33	-34794.3
-1195.59	-1154.76	-974.159	2.47036e+07	2.27475e+07	1.99285e+07	2.49216e+07	2.86193e+07	2.58406e+07	27376.8	7595.87	-34972.7
-1154.76	-1112.32	-1020.72	2.47798e+07	2.27363e+07	2.00133e+07	2.49775e+07	2.86352e+07	2.58411e+07	26648.5	8484.27	-35132.7
-1112.32	-1068.27	-1067.2	2.48523e+07	2.27262e+07	2.00986e+07	2.50331e+07	2.86491e+07	2.58431e+07	25909.3	9353.96	-35263.2
-1068.27	-1022.64	-1113.52	2.49212e+07	2.27176e+07	2.01841e+07	2.50882e+07	2.86605e+07	2.58463e+07	25138.6	10232	-35370.6
-1022.64	-975.435	-1159.65	2.49865e+07	2.27106e+07	2.02695e+07	2.51428e+07	2.86697e+07	2.58507e+07	24348.8	11103.5	-35452.2
-975.435	-935.513	-1213.75	2.50483e+07	2.27051e+07	2.03546e+07	2.51966e+07	2.86765e+07	2.58562e+07	21943.1	12800.7	-34743.8
-935.513	-902.578	-1275.46	2.50892e+07	2.26949e+07	2.04368e+07	2.52543e+07	2.86922e+07	2.58545e+07	20368	14054	-34422.1
-902.578	-867.873	-1336.52	2.51223e+07	2.26825e+07	2.05196e+07	2.5319e+07	2.87139e+07	2.58499e+07	19907.9	14718.2	-34626
-867.873	-831.62	-1397.06	2.51614e+07	2.26716e+07	2.0606e+07	2.53893e+07	2.87349e+07	2.58481e+07	18808.3	15699.2	-34507.5
-831.62	-793.718	-1456.95	2.51986e+07	2.26601e+07	2.0694e+07	2.54664e+07	2.87586e+07	2.58464e+07	18012.9	16507.6	-34520.6
-793.718	-754.246	-1516.17	2.52375e+07	2.26485e+07	2.07842e+07	2.55497e+07	2.8783e+07	2.58465e+07	17016.8	17405.8	-34422.6
-754.246	-713.187	-1574.67	2.52755e+07	2.26363e+07	2.08759e+07	2.56397e+07	2.88091e+07	2.58478e+07	16092.7	18250.6	-34343.2
-713.187	-670.58	-1632.41	2.53134e+07	2.26233e+07	2.09691e+07	2.57363e+07	2.88363e+07	2.58509e+07	15096.2	19117.4	-34213.5
-670.58	-626.437	-1689.34	2.53502e+07	2.26093e+07	2.10632e+07	2.58395e+07	2.88647e+07	2.58556e+07	14106.5	19963.4	-34070
-626.437	-580.79	-1745.41	2.53857e+07	2.25941e+07	2.11582e+07	2.59494e+07	2.88942e+07	2.58624e+07	13083.7	20809.7	-33893.4
-580.79	-522.499	-1790.12	2.54194e+07	2.25774e+07	2.12536e+07	2.6066e+07	2.89246e+07	2.58713e+07	14069.7	20601	-34670.7
-522.499	-452.057	-1823.77	2.54665e+07	2.25624e+07	2.13535e+07	2.61793e+07	2.89453e+07	2.58876e+07	13952.7	20946.1	-34898.9
-452.057	-380.709	-1856.74	2.55162e+07	2.25486e+07	2.14531e+07	2.62888e+07	2.89597e+07	2.5908e+07	12376	22027.9	-34403.9
-380.709	-308.426	-1888.66	2.5557e+07	2.25343e+07	2.15478e+07	2.63996e+07	2.89742e+07	2.59285e+07	11565.4	22704.8	-34270.3
-308.426	-235.785	-1919.42	2.55953e+07	2.25204e+07	2.16399e+07	2.65084e+07	2.89852e+07	2.59512e+07	10317.8	23608	-33925.8
-235.785	-163.526	-1948.51	2.5628e+07	2.25067e+07	2.17278e+07	2.66166e+07	2.8994e+07	2.59748e+07	9264.39	24431.1	-33695.5
-163.526	-93.1907	-1975.21	2.56573e+07	2.24935e+07	2.18121e+07	2.67229e+07	2.89989e+07	2.6e+07	8035.82	25401.9	-33437.8
-93.1907	-27.3002	-1998.18	2.56825e+07	2.24811e+07	2.18923e+07	2.6827e+07	2.89994e+07	2.60262e+07	6783.88	26495.5	-33279.4
-27.3002	31.3051	-2015.98	2.57037e+07	2.24696e+07	2.19692e+07	2.6929e+07	2.89972e+07	2.60543e+07	5413.2	27754.2	-33167.4
31.3051	83.3669	-2028.98	2.57192e+07	2.24585e+07	2.2044e+07	2.70302e+07	2.89964e+07	2.60848e+07	4138.38	28823.3	-32961.7
83.3669	132.022	-2038.79	2.57297e+07	2.24474e+07	2.21161e+07	2.71307e+07	2.8997e+07	2.61173e+07	2959.77	29658.3	-32618.1
132.022	183.431	-2055.94	2.57361e+07	2.24358e+07	2.21846e+07	2.72303e+07	2.89979e+07	2.61513e+07	1328.11	29996.7	-31324.9
183.431	238.695	-2080.71	2.5742e+07	2.24232e+07	2.2256e+07	2.73251e+07	2.90048e+07	2.61891e+07	4.87898	30438.2	-30443.1
238.695	294.195	-2103.87	2.5746e+07	2.24085e+07	2.23246e+07	2.74154e+07	2.90152e+07	2.62274e+07	-946.892	31115.6	-30168.7
294.195	350.185	-2125.69	2.57459e+07	2.23912e+07	2.23842e+07	2.75034e+07	2.90253e+07	2.62635e+07	-2082.93	31599.7	-29516.8
350.185	406.662	-2146.1	2.57431e+07	2.23713e+07	2.24381e+07	2.75879e+07	2.90366e+07	2.62981e+07	-3107.4	32129.4	-29022
406.662	463.661	-2165.14	2.57374e+07	2.23486e+07	2.24849e+07	2.76694e+07	2.90481e+07	2.63305e+07	-4179.83	32578.5	-28398.7
463.661	521.132	-2182.77	2.57293e+07	2.23232e+07	2.25258e+07	2.77476e+07	2.90602e+07	2.63606e+07	-5214.12	33016.4	-27802.3
521.132	579.034	-2198.97	2.5719e+07	2.2295e+07	2.25606e+07	2.78225e+07	2.90725e+07	2.63881e+07	-6255.94	33405.6	-27149.7
579.034	637.297	-2213.7	2.57068e+07	2.22642e+07	2.25899e+07	2.78941e+07	2.9085e+07	2.64128e+07	-7279.37	33766	-26486.6
637.297	695.853	-2226.93	2.56929e+07	2.22305e+07	2.26141e+07	2.79622e+07	2.90976e+07	2.64344e+07	-8297.38	34086	-25788.6
695.853	761.35	-2251.34	2.56776e+07	2.21943e+07	2.26336e+07	2.80269e+07	2.91102e+07	2.64526e+07	-9859.99	33743.3	-23883.3
761.35	833.445	-2286.4	2.56597e+07	2.21549e+07	2.26448e+07	2.80906e+07	2.91202e+07	2.64677e+07	-11112.4	33699.6	-22587.2
833.445	905.368	-2319.38	2.56402e+07	2.21134e+07	2.26513e+07	2.81525e+07	2.91286e+07	2.64805e+07	-11949.6	34064.6	-22115
905.368	977.202	-2350.56	2.562e+07	2.20707e+07	2.26567e+07	2.82112e+07	2.91372e+07	2.6491e+07	-12991.8	34146.1	-21154.3
977.202	1048.76	-2379.72	2.55989e+07	2.20265e+07	2.26594e+07	2.82675e+07	2.9145e+07	2.64989e+07	-13905.1	34318.2	-20413
1048.76	1120.02	-2406.91	2.55773e+07	2.19809e+07	2.26608e+07	2.83208e+07	2.91523e+07	2.65042e+07	-14867.4	34378.1	-19510.7
1120.02	1190.85	-2432.05	2.55552e+07	2.19342e+07	2.26606e+07	2.83714e+07	2.91588e+07	2.65067e+07	-15781.9	34435.5	-18653.6
1190.85	1261.19	-2455.12	2.55328e+07	2.18864e+07	2.26595e+07	2.84191e+07	2.91646e+07	2.65063e+07	-16699.5	34431.2	-17731.7
1261.19	1330.94	-2476.08	2.55102e+07	2.18377e+07	2.26576e+07	2.8464e+07	2.91695e+07	2.65028e+07	-17591.5	34397.5	-16805.9
1330.94	1400.02	-2494.9	2.54876e+07	2.17882e+07	2.26553e+07	2.8506e+07	2.91735e+07	2.64962e+07	-18472.5	34317.2	-15844.8
1400.02	1455.09	-2486.51	2.5465e+07	2.17381e+07	2.26528e+07	2.85451e+07	2.91764e+07	2.64863e+07	-18233.6	35437.5	-17204
1455.09	1496.59	-2451.86	2.54415e+07	2.16861e+07	2.26458e+07	2.85843e+07	2.91759e+07	2.64752e+07	-18568.7	35850.6	-17281.9
1496.59	1537.63	-2415.89	2.54174e+07	2.16338e+07	2.26373e+07	2.86229e+07	2.9173e+07	2.64637e+07	-19674.1	35346.6	-15672.5
1537.63	1577.79	-2378	2.53932e+07	2.15826e+07	2.26313e+07	2.86589e+07	2.91695e+07	2.64506e+07	-20332.5	35286.4	-14953.8
1577.79	1617.19	-2338.5	2.53686e+07	2.15322e+07	2.26262e+07	2.86931e+07	2.91646e+07	2.64364e+07	-21195.1	34934.9	-13739.8
1617.19	1655.67	-2297.24	2.53438e+07	2.14829e+07	2.2623e+07	2.8725e+07	2.91587e+07	2.64209e+07	-21913.3	34690.9	-12777.6
1655.67	1693.2	-2254.3	2.53188e+07	2.14346e+07	2.26212e+07	2.87547e+07	2.91514e+07	2.64042e+07	-22674	34340.3	-11666.4
1693.2	1729.66	-2209.66	2.52936e+07	2.13874e+07	2.26212e+07	2.8782e+07	2.91429e+07	2.63861e+07	-23379.3	34001.2	-10621.9
1729.66	1764.97	-2163.39	2.52682e+07	2.13413e+07	2.26228e+07	2.88068e+07	2.91329e+07	2.63667e+07	-24086.1	33613.5	-9527.44
1764.97	1798.95	-2115.58	2.52428e+07	2.12963e+07	2.26262e+07	2.88285e+07	2.91216e+07	2.63456e+07	-24775	33216.6	-8441.6
1798.95	1820.89	-2048.44	2.52174e+07	2.12523e+07	2.26315e+07	2.88462e+07	2.91085e+07	2.63227e+07	-24767	33773.4	-9006.34
1820.89	1829.68	-1964.05	2.51935e+07	2.12178e+07	2.26559e+07	2.88492e+07	2.91003e+07	2.62826e+07	-25366.2	33913.8	-8547.65
1829.68	1834.74	-1883.42	2.51722e+07	2.11857e+07	2.26885e+07	2.88426e+07	2.90917e+07	2.62263e+07	-28842.3	35502.3	-6660.01
1834.74	1830.34	-1809.63	2.51555e+07	2.11665e+07	2.27155e+07	2.88581e+07	2.90884e+07	2.61635e+07	-29515.3	34725.7	-5210.45
1830.34	1813.6	-1742.34	2.51402e+07	2.11417e+07	2.27418e+07	2.88697e+07	2.90786e+07	2.60929e+07	-29649.2	33222	-3572.82
1813.6	1790.55	-1677.85	2.5123e+07	2.11032e+07	2.27656e+07	2.88751e+07	2.90584e+07	2.60177e+07	-31278.1	33653.9	-2375.72
1790.55	1764.07	-1614.26	2.51049e+07	2.10682e+07	2.27905e+07	2.88908e+07	2.90357e+07	2.59361e+07	-31679.1	32811.1	-1131.97
1764.07	1734.71	-1550.61	2.50784e+07	2.10058e+07	2.28164e+07	2.88833e+07	2.89961e+07	2.58493e+07	-32531	32536.9	-5.92537
1734.71	1703.23	-1486.41	2.50503e+07	2.09504e+07	2.2844e+07	2.88909e+07	2.8954e+07	2.57569e+07	-33010.4	31878.8	1131.63
1703.23	1669.82	-1421.34	2.50217e+07	2.09036e+07	2.28734e+07	2.89141e+07	2.89089e+07	2.56596e+07	-33600.8	31372	2228.84
1669.82	1652.63	-1364.83	2.49868e+07	2.08459e+07	2.2905e+07	2.89306e+07	2.88529e+07	2.55573e+07	-33292.8	29071.6	4221.2
1652.63	1651.12	-1316.32	2.49463e+07	2.07638e+07	2.29285e+07	2.89358e+07	2.87843e+07	2.54654e+07	-33400.3	27691.5	5708.8
1651.12	1647.7	-1266.14	2.49025e+07	2.06711e+07	2.29493e+07	2.89303e+07	2.87107e+07	2.53811e+07	-33995.1	27445.7	6549.36
1647.7	1642.84	-1214.46	2.48602e+07	2.05914e+07	2.29739e+07	2.89277e+07	2.86387e+07	2.52962e+07	-34279	26548.5	7730.52
1642.84	1636.33	-1161.13	2.48167e+07	2.05119e+07	2.29985e+07	2.89209e+07	2.85656e+07	2.52155e+07	-34686	25967.1	8718.92
1636.33	1628.29	-1106.21	2.47735e+07	2.0439e+07	2.30248e+07	2.89139e+07	2.84929e+07	2.51366e+07	-34984.5	25181.1	9803.37
1628.29	1618.64	-1049.67	2.47296e+07	2.03689e+07	2.30514e+07	2.89048e+07	2.84201e+07	2.5061e+07	-35299.6	24473	10826.6
1618.64	1607.4	-991.546	2.46857e+07	2.03032e+07	2.30787e+07	2.88946e+07	2.83477e+07	2.49882e+07	-35564	23691.2	11872.8
1607.4	1594.52	-931.851	2.46414e+07	2.02408e+07	2.31061e+07	2.88831e+07	2.82758e+07	2.49187e+07	-35813	22918.5	12894.5
1594.52	1580	-870.617	2.45971e+07	2.01817e+07	2.31336e+07	2.88706e+07	2.82046e+07	2.48524e+07	-36026.8	22110.7	13916.1
1580	1563.81	-807.873	2.45526e+07	2.01256e+07	2.31608e+07	2.88571e+07	2.81343e+07	2.47897e+07	-36214.6	21292.7	14921.9
1563.81	1555.96	-748.789	2.45082e+07	2.00722e+07	2.31878e+07	2.88428e+07	2.80651e+07	2.47305e+07	-35911.9	19514.6	16397.3
1555.96	1556.05	-693.198	2.44647e+07	2.00251e+07	2.32153e+07	2.88296e+07	2.79962e+07	2.46727e+07	-35823.2	18223.7	17599.5
1556.05	1554.1	-636.049	2.44213e+07	1.99815e+07	2.32429e+07	2.88167e+07	2.7927e+07	2.46168e+07	-36028.2	17580.5	18447.7
1554.1	1550.31	-577.519	2.43771e+07	1.99384e+07	2.32702e+07	2.88029e+07	2.78578e+07	2.45646e+07	-36021.7	16556.5	19465.2
1550.31	1544.54	-517.598	2.43326e+07	1.9897e+07	2.32974e+07	2.87889e+07	2.77884e+07	2.45153e+07	-36075.2	15707.9	20367.4
1544.54	1536.84	-456.398	2.42879e+07	1.98566e+07	2.33245e+07	2.87743e+07	2.77192e+07	2.44694e+07	-36041.2	14735.3	21305.9
1536.84	1527.19	-393.995	2.4243e+07	1.98176e+07	2.33515e+07	2.87595e+07	2.76503e+07	2.44269e+07	-35999.1	13800.6	22198.5
1527.19	1515.61	-330.54	2.41982e+07	1.97795e+07	2.33784e+07	2.87444e+07	2.75817e+07	2.43879e+07	-35906.4	12816.2	23090.2
1515.61	1502.18	-266.247	2.41537e+07	1.97427e+07	2.34055e+07	2.87291e+07	2.75136e+07	2.43524e+07	-35788.5	11827.2	23961.3
1502.18	1487.03	-201.475	2.41096e+07	1.9707e+07	2.34326e+07	2.87136e+07	2.74461e+07	2.43206e+07	-35636.8	10804.2	24832.5
1487.03	1433.68	-122.592	2.40661e+07	1.96724e+07	2.34601e+07	2.86981e+07	2.73794e+07	2.42927e+07	-37568	13182.7	24385.3
1433.68	1348.36	-39.4367	2.40381e+07	1.96693e+07	2.349e+07	2.86949e+07	2.72945e+07	2.42534e+07	-38729.5	13265.2	25464.3
1348.36	1273.79	22.0276	2.40149e+07	1.96749e+07	2.35229e+07	2.86965e+07	2.71921e+07	2.42168e+07	-38674.2	10539.4	28134.8
1273.79	1207.5	65.1478	2.39697e+07	1.96652e+07	2.35559e+07	2.86851e+07	2.70851e+07	2.41869e+07	-39106.5	9462.73	29643.8
1207.5	1145.18	98.7728	2.39182e+07	1.96562e+07	2.35866e+07	2.86702e+07	2.69688e+07	2.41673e+07	-38822.5	7949.69	30872.8
1145.18	1084.19	128.597	2.38568e+07	1.96452e+07	2.36141e+07	2.86487e+07	2.68462e+07	2.41595e+07	-39685.3	6901.08	32784.2
1084.19	1023.64	158.102	2.37949e+07	1.96372e+07	2.3639e+07	2.86241e+07	2.67152e+07	2.41669e+07	-40951.6	5701.99	35249.6
1023.64	962.896	186.188	2.37381e+07	1.96318e+07	2.36631e+07	2.85975e+07	2.65765e+07	2.41942e+07	-39830.7	4639.42	35191.3
962.896	901.58	212.76	2.36657e+07	1.96304e+07	2.36831e+07	2.85578e+07	2.64296e+07	2.42184e+07	-39848.1	3547.32	36300.8
901.58	839.362	238.833	2.35899e+07	1.9633e+07	2.37013e+07	2.85096e+07	2.62749e+07	2.42512e+07	-39230.8	2505.72	36725.1
839.362	799.617	281.141	2.35057e+07	1.96404e+07	2.37162e+07	2.84499e+07	2.61125e+07	2.42864e+07	-32737.2	-736.169	33473.3
799.617	781.178	340.141	2.33821e+07	1.96384e+07	2.37257e+07	2.83694e+07	2.59584e+07	2.43057e+07	-30361.8	-2763.93	33125.7
781.178	760.423	399.106	2.32504e+07	1.96357e+07	2.37359e+07	2.82819e+07	2.58109e+07	2.43207e+07	-30791.2	-3216.03	34007.2
760.423	737.888	458.416	2.31331e+07	1.96423e+07	2.37492e+07	2.81943e+07	2.56613e+07	2.4339e+07	-29640.7	-4517.03	34157.7
737.888	713.264	517.8	2.30178e+07	1.96531e+07	2.37642e+07	2.81034e+07	2.55145e+07	2.43561e+07	-29268.3	-5360.16	34628.4
713.264	686.718	577.304	2.29113e+07	1.96705e+07	2.3782e+07	2.80108e+07	2.53678e+07	2.43741e+07	-28407.9	-6448.98	34856.8
686.718	658.175	636.783	2.28098e+07	1.96932e+07	2.38018e+07	2.79159e+07	2.5223e+07	2.43918e+07	-27741.3	-7403.32	35144.6
658.175	627.698	696.185	2.27152e+07	1.97218e+07	2.38239e+07	2.78191e+07	2.5079e+07	2.44095e+07	-26903.2	-8426.72	35330
627.698	595.283	755.402	2.26263e+07	1.97559e+07	2.38482e+07	2.77204e+07	2.49366e+07	2.44269e+07	-26091.9	-9408.22	35500.1
595.283	560.968	814.355	2.25436e+07	1.97953e+07	2.38745e+07	2.762e+07	2.47955e+07	2.4444e+07	-25202.2	-10406.1	35608.4
560.968	514.169	862.986	2.24666e+07	1.984e+07	2.39027e+07	2.75179e+07	2.46559e+07	2.44605e+07	-26212	-10398.2	36610.2
514.169	455.366	901.55	2.24006e+07	1.98915e+07	2.39336e+07	2.74135e+07	2.45148e+07	2.44791e+07	-26142.6	-10925	37067.6
455.366	395.249	939.854	2.23411e+07	1.99487e+07	2.39657e+07	2.73056e+07	2.4373e+07	2.4498e+07	-24666.5	-12154.9	36821.3
395.249	333.786	977.513	2.22836e+07	2.00106e+07	2.39974e+07	2.71944e+07	2.42327e+07	2.45157e+07	-23893.9	-13005.6	36899.5
333.786	271.489	1014.39	2.22306e+07	2.00774e+07	2.40293e+07	2.70798e+07	2.40931e+07	2.45329e+07	-22686.9	-14074	36760.9
271.489	208.938	1050.05	2.21804e+07	2.01484e+07	2.40607e+07	2.69623e+07	2.39551e+07	2.45492e+07	-21646.3	-15063.7	36710
208.938	147.294	1083.9	2.21336e+07	2.02235e+07	2.40916e+07	2.68419e+07	2.38191e+07	2.45648e+07	-20430.7	-16178.1	36608.7
147.294	88.3494	1114.94	2.20895e+07	2.0302e+07	2.41217e+07	2.67193e+07	2.36865e+07	2.45798e+07	-19193.3	-17373.2	36566.5
88.3494	34.7054	1141.83	2.20476e+07	2.03828e+07	2.41508e+07	2.65948e+07	2.35591e+07	2.45944e+07	-17818.2	-18747.4	36565.6
34.7054	-10.8805	1163.13	2.20073e+07	2.04649e+07	2.41787e+07	2.64697e+07	2.34393e+07	2.46091e+07	-16360.2	-20267.5	36627.7
-10.8805	-49.5734	1182.39	2.19682e+07	2.05469e+07	2.42049e+07	2.63451e+07	2.33301e+07	2.4624e+07	-14691.3	-21587	36278.3
-49.5734	-84.7014	1201.18	2.19302e+07	2.06282e+07	2.42268e+07	2.62224e+07	2.32303e+07	2.46371e+07	-13265.9	-22680.2	35946
-84.7014	-117.842	1217.3	2.18948e+07	2.07083e+07	2.42441e+07	2.61022e+07	2.31391e+07	2.46481e+07	-12045.2	-23722.2	35767.4
-117.842	-150.094	1231.35	2.18629e+07	2.07864e+07	2.42573e+07	2.59848e+07	2.30571e+07	2.46576e+07	-10746.3	-24668	35414.3
-150.094	-182.116	1243.61	2.1834e+07	2.08617e+07	2.42651e+07	2.58706e+07	2.29833e+07	2.46646e+07	-9505.68	-25580.2	35085.9
-182.116	-214.358	1254.33	2.18083e+07	2.09338e+07	2.42675e+07	2.57599e+07	2.29179e+07	2.46691e+07	-8242.59	-26445.3	34687.9
-214.358	-247.123	1263.63	2.17856e+07	2.1002e+07	2.42641e+07	2.56529e+07	2.286e+07	2.46707e+07	-6997.61	-27282.4	34280
-247.123	-280.624	1271.62	2.17659e+07	2.10658e+07	2.42547e+07	2.55498e+07	2.28093e+07	2.46691e+07	-5747.79	-28088.4	33836.2
-280.624	-315.007	1278.37	2.17491e+07	2.1125e+07	2.4239e+07	2.54505e+07	2.27643e+07	2.4664e+07	-4506.16	-28869.6	33375.8
-315.007	-353.519	1287.03	2.17357e+07	2.11794e+07	2.42168e+07	2.53543e+07	2.27232e+07	2.46552e+07	-3272.2	-32217.5	35489.7
-353.519	-394.438	1295.86	2.17263e+07	2.12326e+07	2.42099e+07	2.52599e+07	2.27037e+07	2.46515e+07	-2040.15	-31923.7	33963.9
-394.438	-435.991	1303.19	2.17208e+07	2.12822e+07	2.41889e+07	2.51665e+07	2.26742e+07	2.46407e+07	-808.342	-33130.5	33938.8
-435.991	-478.969	1309.77	2.17163e+07	2.13311e+07	2.4166e+07	2.50758e+07	2.26477e+07	2.46278e+07	408.705	-33653	33244.3
-478.969	-522.906	1315.12	2.17133e+07	2.13793e+07	2.41387e+07	2.49877e+07	2.262e+07	2.46125e+07	1615.74	-34385.1	32769.4
-522.906	-568.033	1319.5	2.17126e+07	2.14275e+07	2.41119e+07	2.49014e+07	2.25943e+07	2.45964e+07	2810.68	-35097.2	32286.6
-568.033	-614.172	1322.76	2.17135e+07	2.14761e+07	2.40849e+07	2.48172e+07	2.25705e+07	2.45795e+07	3993.63	-35671.5	31677.9
-614.172	-660.742	1324.38	2.17162e+07	2.15251e+07	2.40576e+07	2.47351e+07	2.2548e+07	2.4562e+07	5162.96	-35870.9	30707.9
-660.742	-705.171	1321.9	2.17205e+07	2.15735e+07	2.40267e+07	2.46552e+07	2.25245e+07	2.45433e+07	6321.98	-34276	27954
-705.171	-749.715	1317.6	2.17265e+07	2.16152e+07	2.39763e+07	2.45774e+07	2.24864e+07	2.45213e+07	7458.45	-36022.4	28564
-749.715	-795.539	1312.67	2.17343e+07	2.16604e+07	2.39365e+07	2.45019e+07	2.24602e+07	2.45005e+07	8577.79	-35914	27336.2
-795.539	-841.872	1306.48	2.17438e+07	2.17033e+07	2.38915e+07	2.44286e+07	2.24319e+07	2.44791e+07	9681.73	-36755.9	27074.2
-841.872	-893.259	1307.35	2.17553e+07	2.17475e+07	2.38501e+07	2.43575e+07	2.24091e+07	2.44578e+07	11112.3	-36630.7	25518.4
-893.259	-949.229	1314.79	2.17638e+07	2.17888e+07	2.3793e+07	2.42968e+07	2.23796e+07	2.44389e+07	12338	-36970	24632.1
-949.229	-1005.51	1320.93	2.17716e+07	2.1832e+07	2.37346e+07	2.4245e+07	2.23494e+07	2.44262e+07	13296.6	-37401.3	24104.7
-1005.51	-1061.97	1325.94	2.17815e+07	2.18799e+07	2.36858e+07	2.41971e+07	2.23229e+07	2.44199e+07	14378.6	-37724.4	23345.8
-1061.97	-1118.35	1329.84	2.1792e+07	2.19311e+07	2.36404e+07	2.41558e+07	2.22983e+07	2.44205e+07	15383.8	-38051	22667.2
-1118.35	-1174.34	1332.85	2.18034e+07	2.19864e+07	2.36014e+07	2.41196e+07	2.22769e+07	2.4428e+07	16434.5	-38326.9	21892.4
-1174.34	-1229.48	1335.23	2.18152e+07	2.20455e+07	2.35665e+07	2.40895e+07	2.22584e+07	2.4443e+07	17490.4	-38593.5	21103.1
-1229.48	-1283.1	1337.49	2.18272e+07	2.21087e+07	2.35364e+07	2.40655e+07	2.22433e+07	2.44655e+07	18609.5	-38845.9	20236.4
-1283.1	-1334.27	1340.32	2.18388e+07	2.21758e+07	2.35099e+07	2.40484e+07	2.22318e+07	2.44961e+07	19805.3	-39109.3	19303.9
-1334.27	-1382.44	1344.12	2.18495e+07	2.22468e+07	2.34871e+07	2.40387e+07	2.22243e+07	2.45352e+07	21011.1	-39338.3	18327.3
-1382.44	-1443.64	1359.13	2.18591e+07	2.23213e+07	2.34676e+07	2.40363e+07	2.22206e+07	2.4583e+07	21632.3	-38005.8	16373.5
-1443.64	-1518.65	1383.52	2.18711e+07	2.2396e+07	2.34549e+07	2.40297e+07	2.22169e+07	2.46379e+07	22260.1	-37296.7	15036.6
-1518.65	-1592.77	1405.63	2.18856e+07	2.24734e+07	2.34475e+07	2.40187e+07	2.22148e+07	2.46989e+07	23126.1	-37546.3	14420.2
-1592.77	-1666.22	1425.73	2.19021e+07	2.25557e+07	2.34434e+07	2.40059e+07	2.22163e+07	2.47659e+07	23829.8	-37197	13367.2
-1666.22	-1738.66	1443.66	2.19218e+07	2.26422e+07	2.34429e+07	2.39875e+07	2.22208e+07	2.48376e+07	24585.3	-37089.3	12504
-1738.66	-1810.07	1459.45	2.19446e+07	2.27344e+07	2.34441e+07	2.39657e+07	2.22299e+07	2.49141e+07	25274.6	-36768.7	11494
-1810.07	-1880.28	1473.03	2.1971e+07	2.28325e+07	2.34465e+07	2.39401e+07	2.22439e+07	2.4995e+07	25960.6	-36481.1	10520.6
-1880.28	-1949.21	1484.41	2.2001e+07	2.2937e+07	2.34496e+07	2.39114e+07	2.22635e+07	2.50801e+07	26607.8	-36094.1	9486.27
-1949.21	-2016.73	1493.52	2.20349e+07	2.30475e+07	2.34528e+07	2.38795e+07	2.22892e+07	2.51693e+07	27235	-35680.6	8445.6
-2016.73	-2082.74	1500.35	2.20729e+07	2.31642e+07	2.34559e+07	2.38449e+07	2.23216e+07	2.52624e+07	27831.2	-35202.3	7371.11
-2082.74	-2122.25	1492.13	2.21151e+07	2.32867e+07	2.34585e+07	2.38077e+07	2.23608e+07	2.53593e+07	29536.6	-37005.2	7468.57
-2122.25	-2136.09	1469.34	2.21592e+07	2.34457e+07	2.3479e+07	2.37913e+07	2.24213e+07	2.54419e+07	30608.2	-37510.2	6902.04
-2136.09	-2148.89	1444.63	2.2202e+07	2.36132e+07	2.3506e+07	2.37879e+07	2.24888e+07	2.55114e+07	30845.4	-36318.7	5473.28
-2148.89	-2159.98	1417.67	2.22422e+07	2.37607e+07	2.3526e+07	2.3783e+07	2.25508e+07	2.55775e+07	31494.6	-35984.8	4490.15
-2159.98	-2169.61	1388.62	2.22803e+07	2.39037e+07	2.35466e+07	2.37838e+07	2.26124e+07	2.56347e+07	31884.3	-35132.2	3247.97
-2169.61	-2177.55	1357.39	2.23119e+07	2.40158e+07	2.35644e+07	2.37684e+07	2.26648e+07	2.56858e+07	32375.5	-34506.1	2130.63
-2177.55	-2183.83	1324.02	2.23405e+07	2.41242e+07	2.35815e+07	2.37617e+07	2.27156e+07	2.57292e+07	32773.5	-33707	933.506
-2183.83	-2188.35	1288.5	2.23643e+07	2.42198e+07	2.35973e+07	2.37551e+07	2.27617e+07	2.57658e+07	33182.5	-32952.7	-229.833
-2188.35	-2191.07	1250.85	2.23852e+07	2.4312e+07	2.36126e+07	2.37565e+07	2.28044e+07	2.5795e+07	33546.2	-32128.6	-1417.63
-2191.07	-2191.95	1211.08	2.24064e+07	2.44106e+07	2.36272e+07	2.37738e+07	2.28445e+07	2.58174e+07	33894.1	-31298.7	-2595.4
-2191.95	-2196.4	1172	2.24213e+07	2.44934e+07	2.36415e+07	2.37855e+07	2.28777e+07	2.58327e+07	33960.5	-29921.4	-4039.17
-2196.4	-2204.19	1133.53	2.24319e+07	2.45535e+07	2.36477e+07	2.37913e+07	2.29059e+07	2.58532e+07	34136.1	-28799.4	-5336.65
-2204.19	-2209.84	1092.91	2.24398e+07	2.46003e+07	2.36497e+07	2.37897e+07	2.29335e+07	2.58768e+07	34460.7	-28014.9	-6445.77
-2209.84	-2213.46	1050.25	2.24491e+07	2.46538e+07	2.36528e+07	2.37914e+07	2.29619e+07	2.58964e+07	34661.2	-27012.3	-7648.9
-2213.46	-2214.94	1005.54	2.24573e+07	2.47036e+07	2.36543e+07	2.37908e+07	2.29907e+07	2.5916e+07	34884.8	-26094.7	-8790.06
-2214.94	-2214.3	958.831	2.24659e+07	2.47551e+07	2.36553e+07	2.37911e+07	2.30198e+07	2.59335e+07	35051.3	-25100.5	-9950.75
-2214.3	-2211.49	910.166	2.24739e+07	2.48051e+07	2.3655e+07	2.37905e+07	2.30493e+07	2.59501e+07	35203.8	-24120	-11083.8
-2211.49	-2206.49	859.592	2.24818e+07	2.48553e+07	2.36537e+07	2.37901e+07	2.30791e+07	2.59654e+07	35318.4	-23106.5	-12212
-2206.49	-2199.3	807.154	2.24893e+07	2.49044e+07	2.36509e+07	2.37895e+07	2.31092e+07	2.59798e+07	35408.1	-22088.1	-13320
-2199.3	-2189.91	752.907	2.24966e+07	2.49529e+07	2.36467e+07	2.37888e+07	2.31395e+07	2.59932e+07	35465.3	-21051.5	-14413.8
-2189.91	-2178.29	696.909	2.25034e+07	2.50004e+07	2.3641e+07	2.3788e+07	2.31701e+07	2.60059e+07	35494.1	-20006.6	-15487.5
-2178.29	-2184.52	649.452	2.25099e+07	2.50467e+07	2.36336e+07	2.37872e+07	2.3201e+07	2.60178e+07	34575.2	-17078.4	-17496.9
-2184.52	-2207.82	610.183	2.25099e+07	2.50651e+07	2.36173e+07	2.37752e+07	2.32451e+07	2.60473e+07	34115.9	-15146.7	-18969.2
-2207.82	-2228.29	568.989	2.2511e+07	2.50747e+07	2.3594e+07	2.37584e+07	2.33054e+07	2.6089e+07	34278.3	-14538.5	-19739.8
-2228.29	-2246.39	526.183	2.25199e+07	2.50962e+07	2.35674e+07	2.37447e+07	2.33762e+07	2.61315e+07	34054.5	-13196.6	-20858
-2246.39	-2261.86	481.686	2.25327e+07	2.51176e+07	2.35356e+07	2.37304e+07	2.3461e+07	2.61794e+07	33987.6	-12233.4	-21754.2
-2261.86	-2274.83	435.634	2.25512e+07	2.51444e+07	2.35e+07	2.37176e+07	2.35574e+07	2.62275e+07	33785.5	-11051.2	-22734.2
-2274.83	-2285.24	388.045	2.2574e+07	2.51732e+07	2.3461e+07	2.37051e+07	2.36657e+07	2.62741e+07	33605.5	-9974.64	-23630.9
-2285.24	-2293.11	339	2.26015e+07	2.52058e+07	2.34202e+07	2.36935e+07	2.37836e+07	2.63138e+07	33363.7	-8831.39	-24532.3
-2293.11	-2298.43	288.541	2.26343e+07	2.52394e+07	2.33785e+07	2.36836e+07	2.39106e+07	2.63462e+07	33105.4	-7716.48	-25388.9
-2298.43	-2301.22	236.723	2.26741e+07	2.52721e+07	2.33363e+07	2.3677e+07	2.40463e+07	2.63732e+07	32806.7	-6581.89	-26224.8
-2301.22	-2252.46	162.373	2.27213e+07	2.53023e+07	2.3294e+07	2.36748e+07	2.41907e+07	2.63956e+07	35073.1	-10027.1	-25046
-2252.46	-2157.66	73.3035	2.28045e+07	2.53752e+07	2.32541e+07	2.36988e+07	2.4303e+07	2.64032e+07	36225.8	-10675.9	-25549.8
-2157.66	-2071.54	2.06566	2.28981e+07	2.54583e+07	2.32165e+07	2.37335e+07	2.43877e+07	2.64081e+07	35853.5	-7682.68	-28170.8
-2071.54	-1994.15	-49.5417	2.29758e+07	2.55147e+07	2.31792e+07	2.37634e+07	2.44709e+07	2.64268e+07	36388.4	-6550.24	-29838.2
-1994.15	-1922.42	-88.3106	2.30328e+07	2.55649e+07	2.31395e+07	2.37859e+07	2.45416e+07	2.64359e+07	36095.2	-4784.95	-31310.3
-1922.42	-1852.52	-121.043	2.30794e+07	2.56026e+07	2.3096e+07	2.38053e+07	2.46066e+07	2.64595e+07	35922.6	-3720.02	-32202.6
-1852.52	-1783.21	-150.337	2.31123e+07	2.56351e+07	2.30476e+07	2.38192e+07	2.46615e+07	2.64861e+07	35537.8	-2437.42	-33100.4
-1783.21	-1713.69	-178.677	2.31324e+07	2.56609e+07	2.29939e+07	2.38268e+07	2.47087e+07	2.65196e+07	36113.8	-1366.96	-34746.8
-1713.69	-1643.62	-208.432	2.31473e+07	2.56825e+07	2.29358e+07	2.38296e+07	2.47469e+07	2.65655e+07	37329.2	-244.762	-37084.5
-1643.62	-1572.75	-236.85	2.31638e+07	2.57e+07	2.28752e+07	2.38283e+07	2.47769e+07	2.66304e+07	35107.8	802.863	-35910.7
-1572.75	-1508.65	-268.039	2.31726e+07	2.57146e+07	2.28106e+07	2.38185e+07	2.47981e+07	2.67018e+07	32178.3	2567.77	-34746.1
-1508.65	-1450.82	-304.797	2.31402e+07	2.57188e+07	2.27373e+07	2.37924e+07	2.48222e+07	2.67496e+07	31720.2	3902.78	-35622.9
-1450.82	-1391.47	-341.747	2.3103e+07	2.57177e+07	2.26629e+07	2.37609e+07	2.48471e+07	2.68014e+07	31201.7	4710.56	-35912.2
-1391.47	-1330.74	-378.815	2.30637e+07	2.57175e+07	2.25862e+07	2.37242e+07	2.48661e+07	2.68513e+07	30675.9	5774.35	-36450.3
-1330.74	-1268.49	-416.17	2.30216e+07	2.57156e+07	2.25081e+07	2.36817e+07	2.48829e+07	2.69021e+07	30116.7	6673.99	-36790.7
-1268.49	-1204.77	-453.776	2.29774e+07	2.57138e+07	2.24282e+07	2.36334e+07	2.48953e+07	2.69517e+07	29538.8	7637.95	-37176.8
-1204.77	-1139.55	-491.658	2.29313e+07	2.57119e+07	2.23471e+07	2.3579e+07	2.49045e+07	2.70007e+07	28934.8	8544.46	-37479.3
-1139.55	-1072.86	-529.768	2.28837e+07	2.57105e+07	2.22645e+07	2.35182e+07	2.49097e+07	2.70485e+07	28308.9	9459.74	-37768.6
-1072.86	-1004.72	-568.076	2.28348e+07	2.57097e+07	2.21807e+07	2.34508e+07	2.49114e+07	2.70949e+07	27658.4	10349	-38007.4
-1004.72	-935.156	-606.52	2.27852e+07	2.571e+07	2.20959e+07	2.33766e+07	2.49093e+07	2.71396e+07	26984.7	11231	-38215.6
-935.156	-873.373	-653.528	2.2735e+07	2.57117e+07	2.20102e+07	2.32955e+07	2.49035e+07	2.71822e+07	24638.9	12951.8	-37590.7
-873.373	-819.08	-708.715	2.2684e+07	2.57147e+07	2.19235e+07	2.32076e+07	2.48944e+07	2.72223e+07	23150.5	14203.4	-37353.9
-819.08	-763.21	-763.527	2.26332e+07	2.57195e+07	2.18362e+07	2.31126e+07	2.48818e+07	2.72597e+07	22814.7	14831.7	-37646.5
-763.21	-706.016	-818.063	2.25832e+07	2.57264e+07	2.17484e+07	2.30106e+07	2.48655e+07	2.72945e+07	21812.9	15779.4	-37592.2
-706.016	-647.418	-872.148	2.25339e+07	2.57356e+07	2.16601e+07	2.29014e+07	2.48458e+07	2.73262e+07	21121.9	16538.5	-37660.3
-647.418	-587.524	-925.746	2.24858e+07	2.57472e+07	2.15714e+07	2.2785e+07	2.48226e+07	2.73546e+07	20217.1	17382.2	-37599.3
-587.524	-526.351	-978.742	2.24389e+07	2.57614e+07	2.14823e+07	2.26614e+07	2.47961e+07	2.73795e+07	19380.4	18163.7	-37544.1
-526.351	-463.984	-1031.05	2.23936e+07	2.57784e+07	2.13929e+07	2.25305e+07	2.47662e+07	2.74007e+07	18460.5	18962.3	-37422.8
-463.984	-400.504	-1082.57	2.23501e+07	2.57983e+07	2.13032e+07	2.23924e+07	2.47332e+07	2.7418e+07	17538.2	19737.3	-37275.6
-400.504	-336.061	-1133.16	2.23086e+07	2.58212e+07	2.12132e+07	2.22472e+07	2.46973e+07	2.74313e+07	16569.3	20513.9	-37083.2
-336.061	-277.432	-1189.51	2.22693e+07	2.5847e+07	2.11228e+07	2.20949e+07	2.46587e+07	2.74404e+07	14322.8	21897.6	-36220.4
-277.432	-224.312	-1251.35	2.22104e+07	2.58723e+07	2.10248e+07	2.19516e+07	2.46356e+07	2.74353e+07	12724.9	22923.8	-35648.7
-224.312	-170.028	-1311.85	2.21477e+07	2.58965e+07	2.09272e+07	2.1819e+07	2.46225e+07	2.74224e+07	12004	23488.2	-35492.2
-170.028	-114.848	-1371.04	2.20982e+07	2.59206e+07	2.08375e+07	2.16899e+07	2.46077e+07	2.74092e+07	10765.6	24285.8	-35051.3
-114.848	-58.8443	-1428.71	2.20524e+07	2.59439e+07	2.07512e+07	2.15688e+07	2.4597e+07	2.73921e+07	9758.58	24945.9	-34704.5
-58.8443	-1.26829	-1485.75	2.20144e+07	2.59665e+07	2.06704e+07	2.14534e+07	2.4587e+07	2.73733e+07	8581.32	26533.4	-35114.7
-1.26829	59.2478	-1543.5	2.19813e+07	2.59885e+07	2.06001e+07	2.13452e+07	2.45867e+07	2.73566e+07	7456.29	28615.4	-36071.7
59.2478	120.785	-1600.01	2.19541e+07	2.60113e+07	2.0545e+07	2.12433e+07	2.45989e+07	2.73451e+07	6273.59	28609.8	-34883.4
120.785	182.654	-1654.48	2.19319e+07	2.60339e+07	2.0489e+07	2.11473e+07	2.46018e+07	2.73277e+07	5100.87	29593	-34693.9
182.654	245.413	-1707.38	2.1915e+07	2.60579e+07	2.04396e+07	2.1056e+07	2.46022e+07	2.73101e+07	3904.79	30077.9	-33982.7
245.413	308.841	-1758.47	2.19024e+07	2.60834e+07	2.03939e+07	2.09692e+07	2.45966e+07	2.72909e+07	2702.03	30739.3	-33441.3
308.841	369.905	-1801.71	2.18927e+07	2.61117e+07	2.03542e+07	2.08872e+07	2.45884e+07	2.72723e+07	1764.02	31642.4	-33406.4
369.905	428.605	-1837.24	2.18899e+07	2.61437e+07	2.03295e+07	2.08043e+07	2.45852e+07	2.72591e+07	668.918	32347.4	-33016.3
428.605	488.077	-1871.17	2.18908e+07	2.61778e+07	2.03115e+07	2.07213e+07	2.45849e+07	2.72469e+07	-630.535	32854.2	-32223.7
488.077	548.17	-1903.29	2.18922e+07	2.62133e+07	2.02919e+07	2.06413e+07	2.45835e+07	2.72322e+07	-1823.68	33381.4	-31557.7
548.17	608.928	-1933.7	2.18956e+07	2.62506e+07	2.02746e+07	2.05628e+07	2.45828e+07	2.72168e+07	-3073.07	33907.1	-30834
608.928	670.255	-1962.3	2.19002e+07	2.62895e+07	2.02577e+07	2.04868e+07	2.45826e+07	2.72001e+07	-4288.35	34351.7	-30063.4
670.255	730.857	-1987.87	2.19062e+07	2.63302e+07	2.02417e+07	2.04127e+07	2.45828e+07	2.71827e+07	-5516.29	33796.5	-28280.2
730.857	789.423	-2009.16	2.19137e+07	2.63685e+07	2.02176e+07	2.03411e+07	2.4575e+07	2.7162e+07	-6728.89	33000.9	-26272
789.423	847.969	-2028.2	2.19226e+07	2.64025e+07	2.01831e+07	2.02716e+07	2.4558e+07	2.7138e+07	-7930.5	34042.7	-26112.2
847.969	907.112	-2045.62	2.1933e+07	2.64399e+07	2.01543e+07	2.02045e+07	2.45478e+07	2.71149e+07	-9116.95	34038	-24921.1
907.112	964.429	-2057.34	2.19449e+07	2.64763e+07	2.01224e+07	2.01398e+07	2.4536e+07	2.70908e+07	-10126.5	34726.1	-24599.6
964.429	1020.12	-2063.65	2.19614e+07	2.65168e+07	2.01033e+07	2.00711e+07	2.4534e+07	2.70667e+07	-11204.2	34982.9	-23778.7
1020.12	1075.94	-2068.14	2.19814e+07	2.65567e+07	2.00855e+07	1.99995e+07	2.45362e+07	2.70384e+07	-12380	35229.4	-22849.3
1075.94	1131.82	-2070.76	2.20033e+07	2.65935e+07	2.00615e+07	1.99289e+07	2.45389e+07	2.70046e+07	-13469.8	35422.3	-21952.6
1131.82	1187.66	-2071.51	2.20281e+07	2.66287e+07	2.00355e+07	1.98572e+07	2.45436e+07	2.69658e+07	-14569.1	35583	-21013.9
1187.66	1243.39	-2070.37	2.20557e+07	2.66615e+07	2.00059e+07	1.97856e+07	2.45494e+07	2.69216e+07	-15624.3	35699.7	-20075.4
1243.39	1298.9	-2067.33	2.20865e+07	2.66922e+07	1.99742e+07	1.97134e+07	2.45564e+07	2.6872e+07	-16661.4	35777.2	-19115.8
1298.9	1354.12	-2062.39	2.21206e+07	2.67206e+07	1.99402e+07	1.96412e+07	2.45642e+07	2.68169e+07	-17664.7	35813.1	-18148.3
1354.12	1408.96	-2055.53	2.21583e+07	2.6747e+07	1.99047e+07	1.95687e+07	2.45727e+07	2.67563e+07	-18640.5	35807.5	-17167
1408.96	1463.32	-2046.76	2.21996e+07	2.67711e+07	1.98679e+07	1.9496e+07	2.45818e+07	2.669e+07	-19584.2	35761.1	-16176.9
1463.32	1515.24	-2032.57	2.22448e+07	2.67931e+07	1.98305e+07	1.94232e+07	2.45912e+07	2.66181e+07	-20343.6	35847.5	-15503.9
1515.24	1564.68	-2013.11	2.22919e+07	2.68074e+07	1.97776e+07	1.93589e+07	2.45943e+07	2.65467e+07	-21155.2	35800.9	-14645.6
1564.68	1613.39	-1991.92	2.23409e+07	2.68195e+07	1.97202e+07	1.9301e+07	2.45949e+07	2.64785e+07	-22048.8	35591.3	-13542.5
1613.39	1661.16	-1968.98	2.23923e+07	2.68352e+07	1.96703e+07	1.92444e+07	2.45976e+07	2.64115e+07	-22858.6	35415	-12556.4
1661.16	1707.79	-1944.49	2.24458e+07	2.68513e+07	1.96219e+07	1.91917e+07	2.46003e+07	2.63473e+07	-23685.4	35172.5	-11487.1
1707.79	1752.92	-1918.68	2.25014e+07	2.68695e+07	1.95779e+07	1.91416e+07	2.46041e+07	2.6285e+07	-24500.4	34932.3	-10431.9
1752.92	1795.94	-1892.05	2.25587e+07	2.68889e+07	1.95365e+07	1.90953e+07	2.46087e+07	2.62255e+07	-25364.6	34681.6	-9317.04
1795.94	1835.83	-1865.49	2.26175e+07	2.69101e+07	1.94982e+07	1.90529e+07	2.46144e+07	2.61688e+07	-26321.1	34468.5	-8147.45
1835.83	1871.39	-1840.05	2.26772e+07	2.69328e+07	1.9462e+07	1.90162e+07	2.46213e+07	2.61157e+07	-27387.1	34288.9	-6901.78
1871.39	1902.76	-1815.54	2.27372e+07	2.69572e+07	1.94278e+07	1.89867e+07	2.46295e+07	2.6067e+07	-28310.5	34021	-5710.5
1902.76	1940.85	-1796.7	2.27964e+07	2.69823e+07	1.93957e+07	1.89638e+07	2.46386e+07	2.60231e+07	-28680.8	32724.5	-4043.73
1940.85	1988.61	-1782.46	2.28541e+07	2.69936e+07	1.93505e+07	1.89491e+07	2.46421e+07	2.59967e+07	-31091.7	33804.1	-2712.41
1988.61	2036.36	-1766.38	2.29127e+07	2.70195e+07	1.93024e+07	1.89532e+07	2.46523e+07	2.59876e+07	-31590.1	33393.4	-1803.3
2036.36	2082.44	-1748.47	2.29653e+07	2.70341e+07	1.92644e+07	1.89391e+07	2.46601e+07	2.59872e+07	-32077.3	32755.3	-677.964
2082.44	2126.86	-1728.62	2.30183e+07	2.70571e+07	1.92309e+07	1.89251e+07	2.46737e+07	2.59967e+07	-32578.1	32248.6	329.524
2126.86	2169.59	-1706.85	2.30759e+07	2.70984e+07	1.92032e+07	1.89136e+07	2.46966e+07	2.60127e+07	-32972.3	31572.7	1399.6
2169.59	2210.62	-1683.14	2.31358e+07	2.7139e+07	1.91771e+07	1.88925e+07	2.47246e+07	2.60368e+07	-33436.3	31000.7	2435.59
2210.62	2247.68	-1657.44	2.32017e+07	2.71914e+07	1.91526e+07	1.88708e+07	2.47617e+07	2.60679e+07	-31913.2	28431.8	3481.36
2247.68	2281.14	-1629.75	2.32664e+07	2.72304e+07	1.91285e+07	1.88314e+07	2.4804e+07	2.61061e+07	-32351.4	27831.6	4519.78
2281.14	2312.86	-1600.17	2.33366e+07	2.72776e+07	1.91044e+07	1.87915e+07	2.48564e+07	2.61512e+07	-32648.7	27082.9	5565.75
2312.86	2343.12	-1568.92	2.34117e+07	2.73299e+07	1.90796e+07	1.87496e+07	2.49193e+07	2.62029e+07	-32959.5	26338.5	6621.07
2343.12	2371.89	-1536.01	2.34936e+07	2.74014e+07	1.90592e+07	1.87128e+07	2.49929e+07	2.62542e+07	-33218.9	25553.6	7665.26
2371.89	2398.74	-1501.28	2.35797e+07	2.74807e+07	1.90402e+07	1.86788e+07	2.50741e+07	2.63058e+07	-33478.8	24788.7	8690.12
2398.74	2423.66	-1464.75	2.36679e+07	2.75563e+07	1.90188e+07	1.86444e+07	2.51626e+07	2.63613e+07	-33694.6	23978.3	9716.36
2423.66	2446.61	-1426.46	2.37592e+07	2.76336e+07	1.89966e+07	1.86116e+07	2.52586e+07	2.64187e+07	-33890.1	23158.5	10731.6
2446.61	2467.56	-1386.43	2.38528e+07	2.77092e+07	1.89726e+07	1.85797e+07	2.53623e+07	2.64788e+07	-34053.2	22312.6	11740.5
2467.56	2486.48	-1344.71	2.39488e+07	2.77844e+07	1.89471e+07	1.85495e+07	2.54739e+07	2.65409e+07	-34189.9	21450.5	12739.4
2486.48	2503.34	-1301.32	2.40468e+07	2.78579e+07	1.89196e+07	1.8521e+07	2.55935e+07	2.66051e+07	-34297.6	20569.6	13728.1
2503.34	2518.13	-1256.31	2.41468e+07	2.79298e+07	1.88903e+07	1.84945e+07	2.57212e+07	2.66712e+07	-34377.4	19672.1	14705.3
2518.13	2530.83	-1209.71	2.42485e+07	2.79995e+07	1.88589e+07	1.84702e+07	2.58571e+07	2.6739e+07	-34429.2	18759.6	15669.6
2530.83	2541.42	-1161.57	2.43517e+07	2.80669e+07	1.88252e+07	1.84484e+07	2.60013e+07	2.68083e+07	-34452.6	17832.1	16620.5
2541.42	2545.22	-1109.55	2.44561e+07	2.81315e+07	1.87893e+07	1.84292e+07	2.61537e+07	2.6879e+07	-34661.1	17327.2	17333.9
2545.22	2542.4	-1053.79	2.45644e+07	2.82053e+07	1.87542e+07	1.84164e+07	2.63088e+07	2.69444e+07	-34727.5	16576.3	18151.1
2542.4	2537.59	-996.701	2.4673e+07	2.82796e+07	1.8719e+07	1.84082e+07	2.64654e+07	2.70058e+07	-34614.9	15506.3	19108.6
2537.59	2530.66	-938.281	2.47788e+07	2.83448e+07	1.86818e+07	1.84024e+07	2.66261e+07	2.7067e+07	-34556.6	14595.2	19961.4
2530.66	2521.67	-878.613	2.48833e+07	2.8406e+07	1.86435e+07	1.84e+07	2.67892e+07	2.71259e+07	-34427.3	13587.4	20839.9
2521.67	2510.6	-817.736	2.49855e+07	2.84607e+07	1.86038e+07	1.84007e+07	2.69553e+07	2.71836e+07	-34294	12621.6	21672.4
2510.6	2497.48	-755.716	2.50856e+07	2.85102e+07	1.85628e+07	1.84047e+07	2.71238e+07	2.72392e+07	-34121.1	11625.6	22495.5
2497.48	2482.28	-692.609	2.51834e+07	2.85541e+07	1.85204e+07	1.8412e+07	2.72946e+07	2.72931e+07	-33927.4	10639	23288.4
2482.28	2465.05	-628.481	2.52789e+07	2.85928e+07	1.84767e+07	1.84225e+07	2.74674e+07	2.7345e+07	-33703.2	9642.85	24060.4
2465.05	2445.77	-563.398	2.5372e+07	2.86264e+07	1.84316e+07	1.84364e+07	2.7642e+07	2.73947e+07	-33453.5	8647.84	24805.7
2445.77	2429.25	-499.856	2.54626e+07	2.86551e+07	1.83855e+07	1.84537e+07	2.7818e+07	2.74418e+07	-32957.7	7205.94	25751.8
2429.25	2415.31	-437.826	2.55374e+07	2.86458e+07	1.83338e+07	1.84685e+07	2.80231e+07	2.75011e+07	-32551.5	6002.65	26548.9
2415.31	2399.26	-374.981	2.5607e+07	2.86223e+07	1.82784e+07	1.8486e+07	2.82512e+07	2.75594e+07	-32274.4	5116.38	27158.1
2399.26	2381.23	-311.479	2.5683e+07	2.86118e+07	1.8224e+07	1.85114e+07	2.84819e+07	2.75984e+07	-31886.3	4056.87	27829.4
2381.23	2361.23	-247.42	2.57619e+07	2.85974e+07	1.81716e+07	1.85446e+07	2.87235e+07	2.76259e+07	-31518.5	3089.63	28428.9
2361.23	2339.36	-183.008	2.58498e+07	2.85828e+07	1.81222e+07	1.85886e+07	2.89714e+07	2.76429e+07	-31102.5	2068.91	29033.6
2339.36	2315.75	-118.526	2.59366e+07	2.85629e+07	1.80767e+07	1.8642e+07	2.92281e+07	2.76435e+07	-30680.7	1070.44	29610.3
2315.75	2290.64	-53.1616	2.60178e+07	2.85386e+07	1.80347e+07	1.87054e+07	2.94918e+07	2.76228e+07	-31382.9	45.2655	31337.6
2290.64	2264.46	13.072	2.61218e+07	2.85083e+07	1.79967e+07	1.87848e+07	2.97631e+07	2.76123e+07	-31886.1	-996.86	32883
2264.46	2237.39	78.0149	2.62379e+07	2.84715e+07	1.79636e+07	1.88789e+07	3.00415e+07	2.7601e+07	-30961.1	-2040.27	33001.3
2237.39	2194.91	132.074	2.63583e+07	2.84275e+07	1.79351e+07	1.89873e+07	3.03272e+07	2.75827e+07	-31244.6	-1715.3	32959.9
2194.91	2137.81	175.167	2.65335e+07	2.84035e+07	1.79103e+07	1.91078e+07	3.05845e+07	2.75898e+07	-31235.5	-2136	33371.5
2137.81	2080.42	216.432	2.67181e+07	2.8385e+07	1.78835e+07	1.92295e+07	3.0821e+07	2.76043e+07	-30455.6	-3490.82	33946.4
2080.42	2022.02	256.719	2.68808e+07	2.83533e+07	1.78529e+07	1.93506e+07	3.10575e+07	2.76168e+07	-30027	-4283.47	34310.4
2022.02	1962.57	296.4	2.7038e+07	2.8319e+07	1.78191e+07	1.94706e+07	3.12824e+07	2.76313e+07	-29360.4	-5335.53	34695.9
1962.57	1901.83	335.763	2.71814e+07	2.82775e+07	1.77814e+07	1.95891e+07	3.15018e+07	2.76452e+07	-28780.5	-6212.69	34993.1
1901.83	1839.8	374.938	2.73162e+07	2.8232e+07	1.77399e+07	1.97051e+07	3.17118e+07	2.76597e+07	-28117.9	-7153.31	35271.2
1839.8	1776.41	414.012	2.74404e+07	2.81815e+07	1.76945e+07	1.98184e+07	3.19143e+07	2.76737e+07	-27466.3	-8032.69	35499
1776.41	1711.66	453.011	2.75558e+07	2.81272e+07	1.76453e+07	1.99281e+07	3.2108e+07	2.76876e+07	-26777.8	-8919.08	35696.9
1711.66	1645.55	491.939	2.76625e+07	2.80691e+07	1.75922e+07	2.0034e+07	3.22934e+07	2.77009e+07	-26078.9	-9777.83	35856.7
1645.55	1590.58	542.24	2.77613e+07	2.80078e+07	1.75355e+07	2.01354e+07	3.24699e+07	2.77137e+07	-23122.4	-11791.8	34914.1
1590.58	1546.33	603.469	2.78211e+07	2.79304e+07	1.74721e+07	2.02471e+07	3.26633e+07	2.77093e+07	-21343.8	-13165.5	34509.3
1546.33	1500.42	664.127	2.78665e+07	2.78423e+07	1.74089e+07	2.0372e+07	3.28658e+07	2.7696e+07	-21142.7	-13696.8	34839.4
1500.42	1453.19	724.395	2.79232e+07	2.77516e+07	1.73513e+07	2.05026e+07	3.30614e+07	2.76853e+07	-20053.6	-14667	34720.7
1453.19	1404.51	784.072	2.79773e+07	2.76541e+07	1.72965e+07	2.06433e+07	3.32581e+07	2.76716e+07	-19402	-15384.7	34786.7
1404.51	1354.5	843.164	2.80357e+07	2.75518e+07	1.72462e+07	2.07913e+07	3.34505e+07	2.76582e+07	-18475.6	-16223.2	34698.8
1354.5	1303.14	901.564	2.80942e+07	2.74439e+07	1.71995e+07	2.09479e+07	3.36403e+07	2.76434e+07	-17657.9	-16980.3	34638.3
1303.14	1250.5	959.23	2.81547e+07	2.73312e+07	1.71571e+07	2.1112e+07	3.38246e+07	2.76283e+07	-16743.2	-17765.7	34508.9
1250.5	1196.58	1016.08	2.82159e+07	2.72142e+07	1.71188e+07	2.12832e+07	3.4002e+07	2.76121e+07	-15843	-18519.2	34362.2
1196.58	1141.43	1072.07	2.82785e+07	2.7094e+07	1.70847e+07	2.14603e+07	3.41688e+07	2.75949e+07	-14897.9	-19273.8	34171.7
1141.43	1075.87	1118.57	2.8342e+07	2.69719e+07	1.70552e+07	2.1642e+07	3.43218e+07	2.75764e+07	-15599.6	-19150.6	34750.2
1075.87	1000.24	1155.84	2.84197e+07	2.68515e+07	1.70352e+07	2.18148e+07	3.44505e+07	2.75646e+07	-15385	-19479.5	34864.5
1000.24	923.744	1192.39	2.85003e+07	2.67322e+07	1.70209e+07	2.19795e+07	3.45608e+07	2.75562e+07	-13967	-20406.4	34373.4
923.744	846.191	1227.98	2.85726e+07	2.66131e+07	1.70082e+07	2.21427e+07	3.46598e+07	2.75467e+07	-13172	-20989.2	34161.2
846.191	767.745	1262.66	2.86421e+07	2.64952e+07	1.69999e+07	2.23002e+07	3.47447e+07	2.7539e+07	-12020.3	-21734.6	33754.9
767.745	687.414	1297.26	2.87057e+07	2.63788e+07	1.69948e+07	2.24538e+07	3.48178e+07	2.75322e+07	-11040.9	-23168.4	34209.2
687.414	603.912	1333.12	2.87651e+07	2.62634e+07	1.69991e+07	2.26022e+07	3.48878e+07	2.75319e+07	-9952.12	-25100.5	35052.7
603.912	519.108	1368.37	2.88194e+07	2.61499e+07	1.70161e+07	2.27458e+07	3.4961e+07	2.75402e+07	-8899.23	-25132.8	34032
519.108	433.919	1402.17	2.8869e+07	2.60402e+07	1.70337e+07	2.28841e+07	3.50157e+07	2.75475e+07	-7804.87	-26097.4	33902.3
433.919	348.126	1434.8	2.89139e+07	2.59342e+07	1.7058e+07	2.30172e+07	3.50636e+07	2.75588e+07	-6710.15	-26623.9	33334.1
348.126	262.403	1465.8	2.8954e+07	2.58313e+07	1.70671e+07	2.3145e+07	3.50708e+07	2.756e+07	-5582.52	-27355.8	32938.3
262.403	171.466	1484.2	2.89894e+07	2.57318e+07	1.7087e+07	2.32677e+07	3.50816e+07	2.7569e+07	-5977.48	-26488	32465.5
171.466	81.8154	1486.55	2.90301e+07	2.56346e+07	1.71048e+07	2.3371e+07	3.50609e+07	2.75782e+07	-5317.98	-26151.8	31469.8
81.8154	7.24882	1479.87	2.9069e+07	2.55398e+07	1.71189e+07	2.34599e+07	3.50232e+07	2.7587e+07	-3255.47	-28643.9	31899.3
7.24882	-49.4118	1462.75	2.90977e+07	2.54487e+07	1.71374e+07	2.35468e+07	3.50011e+07	2.75994e+07	-1769.66	-29943.6	31713.2
-49.4118	-93.1742	1437.74	2.91202e+07	2.53573e+07	1.71544e+07	2.36291e+07	3.49827e+07	2.76116e+07	-215.783	-31360.6	31576.3
-93.1742	-130.914	1408.35	2.91363e+07	2.52646e+07	1.71704e+07	2.37087e+07	3.4972e+07	2.76233e+07	993.66	-32057.6	31063.9
-130.914	-165.222	1375.92	2.91483e+07	2.51694e+07	1.71853e+07	2.37837e+07	3.49652e+07	2.76335e+07	2260.27	-32856.1	30595.8
-165.222	-197.613	1341.21	2.9156e+07	2.50769e+07	1.7214e+07	2.3855e+07	3.49836e+07	2.7647e+07	3427.87	-33438.2	30010.3
-197.613	-228.867	1304.63	2.91599e+07	2.49774e+07	1.72293e+07	2.39221e+07	3.49877e+07	2.76535e+07	4607.27	-34032.2	29424.9
-228.867	-259.529	1266.45	2.91602e+07	2.48761e+07	1.72454e+07	2.39856e+07	3.49975e+07	2.76574e+07	5750.78	-34541.5	28790.7
-259.529	-308.128	1262.92	2.9157e+07	2.47695e+07	1.72546e+07	2.40454e+07	3.50018e+07	2.76559e+07	8558.5	-33335.5	24777
-308.128	-374.456	1292.92	2.9144e+07	2.46565e+07	1.72425e+07	2.41164e+07	3.49915e+07	2.76487e+07	10440.2	-32971.6	22531.4
-374.456	-440.781	1320.65	2.91244e+07	2.45405e+07	1.72218e+07	2.41943e+07	3.49706e+07	2.76425e+07	11112.6	-33783.6	22670.9
-440.781	-507.529	1346.95	2.91018e+07	2.44263e+07	1.72094e+07	2.42705e+07	3.4951e+07	2.76406e+07	12428.2	-33912.6	21484.4
-507.529	-574.407	1371.34	2.90743e+07	2.43115e+07	1.71957e+07	2.43494e+07	3.49266e+07	2.76416e+07	13393.1	-34364.3	20971.2
-574.407	-641.489	1394.02	2.90428e+07	2.41976e+07	1.71855e+07	2.44284e+07	3.49009e+07	2.76463e+07	14537	-34592.4	20055.4
-641.489	-708.636	1414.83	2.9007e+07	2.4084e+07	1.71759e+07	2.45082e+07	3.48723e+07	2.76544e+07	15573.8	-34891.2	19317.3
-708.636	-775.814	1433.81	2.89673e+07	2.39715e+07	1.71682e+07	2.45875e+07	3.48416e+07	2.7666e+07	16653.6	-35098.6	18445.1
-775.814	-842.928	1450.89	2.8924e+07	2.386e+07	1.71617e+07	2.46652e+07	3.48082e+07	2.76809e+07	17693.4	-35301	17607.6
-842.928	-909.906	1466.06	2.88777e+07	2.37499e+07	1.71568e+07	2.47396e+07	3.47723e+07	2.76988e+07	18734.2	-35448.9	16714.7
-909.906	-967.541	1462.17	2.88289e+07	2.36416e+07	1.7153e+07	2.48094e+07	3.47338e+07	2.77191e+07	19005.3	-36418.7	17413.4
-967.541	-1016.07	1439.9	2.87789e+07	2.35477e+07	1.71699e+07	2.48714e+07	3.47146e+07	2.7735e+07	19670.2	-36888.8	17218.6
-1016.07	-1064.38	1416.36	2.87274e+07	2.34578e+07	1.71927e+07	2.49289e+07	3.47035e+07	2.7742e+07	20860.7	-36722.3	15861.7
-1064.38	-1112.03	1391.26	2.86744e+07	2.33606e+07	1.72058e+07	2.4985e+07	3.46858e+07	2.77419e+07	21757.3	-36852.9	15095.6
-1112.03	-1158.77	1365.06	2.86203e+07	2.32627e+07	1.72181e+07	2.50385e+07	3.46689e+07	2.77334e+07	22821.8	-36787.8	13966
-1158.77	-1203.92	1338.13	2.85653e+07	2.31612e+07	1.72257e+07	2.50908e+07	3.46487e+07	2.77173e+07	23852.1	-36816.5	12964.4
-1203.92	-1246.42	1311.45	2.85096e+07	2.30586e+07	1.72313e+07	2.51424e+07	3.46274e+07	2.76933e+07	25037.6	-36825.3	11787.7
-1246.42	-1284.58	1286.44	2.8453e+07	2.29546e+07	1.72338e+07	2.51958e+07	3.46042e+07	2.76623e+07	26386.4	-36932.5	10546.1
-1284.58	-1317.51	1263.82	2.83952e+07	2.28505e+07	1.72337e+07	2.52538e+07	3.45798e+07	2.76248e+07	27749.5	-37000.4	9250.91
-1317.51	-1346.34	1242.46	2.83357e+07	2.2746e+07	1.72312e+07	2.53179e+07	3.45535e+07	2.7582e+07	28844.7	-36915.5	8070.88
-1346.34	-1385.37	1228.69	2.82739e+07	2.26403e+07	1.72282e+07	2.53862e+07	3.4524e+07	2.7534e+07	29280.4	-35502.2	6221.81
-1385.37	-1436.72	1221.32	2.82097e+07	2.25069e+07	1.7211e+07	2.54393e+07	3.44689e+07	2.74912e+07	31233.1	-36035.7	4802.58
-1436.72	-1488.86	1212.1	2.81481e+07	2.23808e+07	1.71891e+07	2.54967e+07	3.44131e+07	2.74543e+07	32927.8	-36841.6	3913.85
-1488.86	-1540.03	1201.03	2.80912e+07	2.22808e+07	1.71731e+07	2.5564e+07	3.43691e+07	2.74185e+07	33101.9	-35842.5	2740.61
-1540.03	-1589.53	1187.91	2.8036e+07	2.21824e+07	1.71574e+07	2.56221e+07	3.4321e+07	2.73867e+07	33985.9	-35702.6	1716.66
-1589.53	-1637.68	1172.78	2.79847e+07	2.20985e+07	1.71449e+07	2.56807e+07	3.42771e+07	2.73571e+07	34453.1	-35055.8	602.696
-1637.68	-1684.25	1155.57	2.79364e+07	2.20221e+07	1.71338e+07	2.57349e+07	3.42337e+07	2.73307e+07	35067.4	-34598	-469.457
-1684.25	-1727.51	1136.24	2.78921e+07	2.19566e+07	1.71247e+07	2.57871e+07	3.41929e+07	2.7307e+07	34102.1	-32536.6	-1565.41
-1727.51	-1766.64	1114.75	2.78465e+07	2.1885e+07	1.7117e+07	2.58224e+07	3.41472e+07	2.72862e+07	33753.2	-31103.7	-2649.53
-1766.64	-1803.74	1091.19	2.78012e+07	2.18136e+07	1.71109e+07	2.58476e+07	3.41006e+07	2.72681e+07	34618.8	-30868.8	-3750.09
-1803.74	-1834.6	1063.25	2.77604e+07	2.17547e+07	1.71059e+07	2.58747e+07	3.40586e+07	2.72529e+07	34973.2	-30347.8	-4625.41
-1834.6	-1859.06	1031.02	2.77229e+07	2.17095e+07	1.71051e+07	2.59019e+07	3.4021e+07	2.72368e+07	35534.6	-29915.1	-5619.45
-1859.06	-1881.73	996.868	2.76886e+07	2.16752e+07	1.71067e+07	2.59306e+07	3.3986e+07	2.72203e+07	35706.2	-28940.4	-6765.79
-1881.73	-1902.36	960.755	2.76553e+07	2.16424e+07	1.71084e+07	2.59558e+07	3.39506e+07	2.72053e+07	36018.9	-28196.5	-7822.42
-1902.36	-1920.98	922.744	2.76242e+07	2.16157e+07	1.71113e+07	2.598e+07	3.39164e+07	2.71907e+07	36187.3	-27268.9	-8918.41
-1920.98	-1937.48	882.847	2.75946e+07	2.15923e+07	1.71147e+07	2.60019e+07	3.38827e+07	2.71771e+07	36364.8	-26383.1	-9981.74
-1937.48	-1951.81	841.108	2.75669e+07	2.15732e+07	1.71187e+07	2.6022e+07	3.38499e+07	2.71642e+07	36469.6	-25420.4	-11049.2
-1951.81	-1963.9	797.557	2.75408e+07	2.15574e+07	1.7123e+07	2.604e+07	3.38179e+07	2.71522e+07	36545.9	-24446.9	-12099
-1963.9	-1973.72	752.239	2.75163e+07	2.15451e+07	1.71276e+07	2.60561e+07	3.3787e+07	2.7141e+07	36571.1	-23430.3	-13140.8
-1973.72	-1981.21	705.192	2.74932e+07	2.15356e+07	1.71324e+07	2.60703e+07	3.37572e+07	2.71306e+07	36558	-22390.4	-14167.6
-1981.21	-1986.32	656.464	2.74717e+07	2.15288e+07	1.71371e+07	2.60824e+07	3.37285e+07	2.7121e+07	36501.4	-21320.2	-15181.2
-1986.32	-2002.9	613.175	2.74513e+07	2.15242e+07	1.71418e+07	2.60927e+07	3.37012e+07	2.71122e+07	35770.7	-18931.6	-16839
-2002.9	-2030.37	575.086	2.74335e+07	2.1527e+07	1.71475e+07	2.61031e+07	3.36744e+07	2.71017e+07	35338.4	-17214	-18124.5
-2030.37	-2054.95	535.209	2.74166e+07	2.15336e+07	1.7154e+07	2.61127e+07	3.36471e+07	2.70899e+07	35319.1	-16396.3	-18922.8
-2054.95	-2076.92	493.77	2.73993e+07	2.15392e+07	1.71603e+07	2.612e+07	3.36194e+07	2.70784e+07	35016	-15056.5	-19959.5
-2076.92	-2096.08	450.719	2.73819e+07	2.15458e+07	1.71666e+07	2.61258e+07	3.35912e+07	2.70666e+07	34806.4	-13965.7	-20840.7
-2096.08	-2112.51	406.157	2.73642e+07	2.15521e+07	1.71728e+07	2.61297e+07	3.35627e+07	2.70548e+07	34489.4	-12711.9	-21777.5
-2112.51	-2126.13	360.103	2.7346e+07	2.15584e+07	1.71789e+07	2.6132e+07	3.3534e+07	2.7043e+07	34175.1	-11521	-22654.1
-2126.13	-2136.97	312.623	2.73273e+07	2.15644e+07	1.71848e+07	2.61326e+07	3.35051e+07	2.70312e+07	33807	-10275.8	-23531.2
-2136.97	-2144.99	263.751	2.7308e+07	2.15702e+07	1.71904e+07	2.61316e+07	3.34762e+07	2.70194e+07	33417.3	-9043.13	-24374.1
-2144.99	-2150.21	213.533	2.72879e+07	2.15756e+07	1.71957e+07	2.61291e+07	3.34472e+07	2.70078e+07	32991.2	-7791.88	-25199.3
-2150.21	-2116.61	146.909	2.72671e+07	2.15805e+07	1.72007e+07	2.61252e+07	3.34184e+07	2.69963e+07	34488.5	-9900.71	-24587.8
-2116.61	-2048.13	69.4166	2.72413e+07	2.15737e+07	1.72037e+07	2.61173e+07	3.33955e+07	2.69901e+07	35130.4	-9963.29	-25167.1
-2048.13	-1984.72	3.97306	2.72135e+07	2.1562e+07	1.7205e+07	2.61071e+07	3.33791e+07	2.69863e+07	34597.1	-7369.9	-27227.2
-1984.72	-1926.63	-47.6506	2.71868e+07	2.15551e+07	1.7206e+07	2.60966e+07	3.33655e+07	2.69788e+07	34773.6	-6113.28	-28660.3
-1926.63	-1872.1	-90.962	2.71602e+07	2.15484e+07	1.72069e+07	2.60858e+07	3.33555e+07	2.69692e+07	35638.6	-4365.14	-31273.5
-1872.1	-1818.39	-131.646	2.71478e+07	2.15427e+07	1.72074e+07	2.60808e+07	3.33487e+07	2.69688e+07	36274.1	-3144.02	-33130.1
-1818.39	-1764.53	-169.877	2.71471e+07	2.15362e+07	1.72087e+07	2.60804e+07	3.33454e+07	2.69756e+07	35318.7	-1771.42	-33547.2
-1764.53	-1709.77	-206.494	2.71449e+07	2.15294e+07	1.72116e+07	2.60797e+07	3.33455e+07	2.69776e+07	35112.7	-572.822	-34539.9
-1709.77	-1653.76	-242.53	2.71392e+07	2.15216e+07	1.7216e+07	2.60785e+07	3.33491e+07	2.69734e+07	34479.9	651.317	-35131.2
-1653.76	-1596.27	-278.335	2.71188e+07	2.15131e+07	1.72206e+07	2.60745e+07	3.3356e+07	2.69541e+07	34035.5	1806.96	-35842.5
-1596.27	-1547.41	-322.96	2.7118e+07	2.15038e+07	1.72272e+07	2.60776e+07	3.3366e+07	2.69497e+07	31654.6	3907.68	-35562.3
-1547.41	-1506.68	-376.296	2.71266e+07	2.14912e+07	1.7237e+07	2.60851e+07	3.33813e+07	2.6952e+07	30256.6	5454.34	-35711
-1506.68	-1463.84	-429.924	2.71311e+07	2.14768e+07	1.72489e+07	2.6095e+07	3.34013e+07	2.69475e+07	30162	6298.03	-36460.1
-1463.84	-1419.16	-482.315	2.71442e+07	2.14618e+07	1.72645e+07	2.61101e+07	3.34247e+07	2.69459e+07	27811	7489.18	-35300.2
-1419.16	-1372.53	-533.174	2.7143e+07	2.14453e+07	1.72801e+07	2.61273e+07	3.34521e+07	2.69296e+07	26931.3	8461.21	-35392.5
-1372.53	-1324.06	-584.346	2.71418e+07	2.14277e+07	1.72974e+07	2.61493e+07	3.34832e+07	2.69111e+07	26495.3	9515.89	-36011.2
-1324.06	-1273.73	-635.964	2.71451e+07	2.14086e+07	1.73174e+07	2.61766e+07	3.35179e+07	2.68944e+07	25795.3	10493.3	-36288.6
-1273.73	-1221.63	-687.852	2.71502e+07	2.13883e+07	1.73396e+07	2.62094e+07	3.35559e+07	2.68777e+07	25210.7	11479.5	-36690.3
-1221.63	-1167.8	-739.989	2.71582e+07	2.13665e+07	1.73644e+07	2.62477e+07	3.35973e+07	2.68621e+07	24536.9	12427.9	-36964.9
-1167.8	-1112.32	-792.264	2.71682e+07	2.13433e+07	1.73916e+07	2.62919e+07	3.36418e+07	2.68472e+07	23883.4	13363	-37246.4
-1112.32	-1056.57	-845.858	2.71803e+07	2.13186e+07	1.74215e+07	2.63421e+07	3.36892e+07	2.68335e+07	22948.2	14397.2	-37345.4
-1056.57	-1000.58	-900.628	2.72064e+07	2.12976e+07	1.7455e+07	2.63949e+07	3.37319e+07	2.68262e+07	22134.5	15344.4	-37478.9
-1000.58	-943.066	-955.247	2.72376e+07	2.12781e+07	1.74899e+07	2.64484e+07	3.37715e+07	2.68229e+07	21467.6	16179.2	-37646.8
-943.066	-884.128	-1009.65	2.72639e+07	2.1257e+07	1.75245e+07	2.65038e+07	3.38124e+07	2.68198e+07	20689.8	17040.8	-37730.6
-884.128	-823.805	-1063.73	2.72905e+07	2.1236e+07	1.75597e+07	2.65601e+07	3.38522e+07	2.68188e+07	19938.5	17854.7	-37793.2
-823.805	-762.168	-1117.42	2.73147e+07	2.12144e+07	1.7595e+07	2.66178e+07	3.3892e+07	2.68188e+07	19139.9	18660.5	-37800.4
-762.168	-699.272	-1170.62	2.73381e+07	2.11926e+07	1.76306e+07	2.66764e+07	3.39309e+07	2.68203e+07	18332.8	19437.6	-37770.3
-699.272	-635.184	-1223.23	2.736e+07	2.11706e+07	1.76665e+07	2.6736e+07	3.39692e+07	2.6823e+07	17496.4	20196.9	-37693.2
-635.184	-569.968	-1275.18	2.73809e+07	2.11486e+07	1.77026e+07	2.67965e+07	3.40066e+07	2.6827e+07	16641.3	20933.4	-37574.7
-569.968	-503.702	-1326.37	2.74006e+07	2.11264e+07	1.77389e+07	2.68577e+07	3.40429e+07	2.68323e+07	15762	21650.3	-37412.3
-503.702	-435.664	-1375.91	2.74193e+07	2.11044e+07	1.77754e+07	2.69195e+07	3.40781e+07	2.68387e+07	15008.5	22272.3	-37280.8
-435.664	-366.027	-1423.72	2.74492e+07	2.10857e+07	1.78148e+07	2.69738e+07	3.41038e+07	2.68506e+07	14151.1	22919.7	-37070.8
-366.027	-295.823	-1470.4	2.74824e+07	2.10697e+07	1.7854e+07	2.70203e+07	3.41227e+07	2.68651e+07	13160.8	23612.5	-36773.3
-295.823	-225.411	-1515.69	2.75097e+07	2.10547e+07	1.78901e+07	2.70632e+07	3.41404e+07	2.68789e+07	12196.5	24277.8	-36474.3
-225.411	-155.482	-1559.22	2.75362e+07	2.10414e+07	1.79246e+07	2.70999e+07	3.41543e+07	2.68935e+07	11159.3	24984.2	-36143.5
-155.482	-87.2459	-1600.29	2.75597e+07	2.10293e+07	1.79568e+07	2.71319e+07	3.41666e+07	2.6908e+07	10078.7	25745.7	-35824.5
-87.2459	-22.7526	-1637.85	2.75814e+07	2.10199e+07	1.79815e+07	2.71587e+07	3.41685e+07	2.69182e+07	8900.78	26635.2	-35536
-22.7526	35.8437	-1670.73	2.76004e+07	2.10127e+07	1.79942e+07	2.71815e+07	3.41567e+07	2.69213e+07	7649.34	27626.9	-35276.2
35.8437	89.2561	-1699.29	2.7617e+07	2.10028e+07	1.80089e+07	2.72008e+07	3.41552e+07	2.69278e+07	6442.59	28469.6	-34912.2
89.2561	143.08	-1727.82	2.76318e+07	2.09911e+07	1.80181e+07	2.7217e+07	3.4153e+07	2.69321e+07	5307.15	31729.8	-37037
143.08	196.869	-1755.21	2.76456e+07	2.09755e+07	1.8044e+07	2.72298e+07	3.41815e+07	2.69474e+07	4173.68	31280.2	-35453.9
196.869	250.464	-1781.85	2.76589e+07	2.09591e+07	1.80586e+07	2.72394e+07	3.41984e+07	2.69557e+07	2966.84	32217.5	-35184.3
250.464	304.637	-1808.21	2.76692e+07	2.09415e+07	1.80691e+07	2.72489e+07	3.42159e+07	2.69613e+07	1806.95	32101.2	-33908.2
304.637	355.711	-1829.57	2.76781e+07	2.09229e+07	1.80715e+07	2.72578e+07	3.42242e+07	2.69621e+07	701.653	30389.1	-31090.8
355.711	406.324	-1848.48	2.76876e+07	2.09014e+07	1.80562e+07	2.72642e+07	3.42083e+07	2.69541e+07	-435.888	32005.7	-31569.8
406.324	457.757	-1866.14	2.76968e+07	2.08782e+07	1.80481e+07	2.72693e+07	3.42044e+07	2.69487e+07	-1559.66	31782.9	-30223.2
457.757	509.343	-1881.89	2.77061e+07	2.08518e+07	1.80332e+07	2.72724e+07	3.41924e+07	2.69397e+07	-2699.06	32515.5	-29816.5
509.343	561.424	-1896.06	2.77151e+07	2.08234e+07	1.80195e+07	2.7274e+07	3.41835e+07	2.69303e+07	-3833.01	32694	-28861
561.424	613.775	-1908.43	2.7724e+07	2.0794e+07	1.80112e+07	2.72739e+07	3.41823e+07	2.69213e+07	-4972.46	33134.1	-28161.6
613.775	666.457	-1919.08	2.77326e+07	2.07656e+07	1.80128e+07	2.72724e+07	3.41939e+07	2.69138e+07	-6107.71	33394.3	-27286.6
666.457	719.365	-1927.93	2.77408e+07	2.0734e+07	1.80081e+07	2.72694e+07	3.41969e+07	2.6903e+07	-7242.05	33712.6	-26470.5
719.365	778.138	-1945.68	2.77485e+07	2.07018e+07	1.80057e+07	2.72652e+07	3.42026e+07	2.68909e+07	-8840.17	33431	-24590.8
778.138	842.479	-1971.87	2.7752e+07	2.06665e+07	1.79915e+07	2.72666e+07	3.41973e+07	2.68765e+07	-10180.4	33431.1	-23250.7
842.479	906.713	-1995.83	2.77529e+07	2.0631e+07	1.79757e+07	2.7272e+07	3.41879e+07	2.68635e+07	-11173.9	33765.2	-22591.3
906.713	970.914	-2017.78	2.77534e+07	2.05967e+07	1.79649e+07	2.72774e+07	3.41785e+07	2.68533e+07	-12341	33872.3	-21531.2
970.914	1034.94	-2037.56	2.7752e+07	2.05629e+07	1.79551e+07	2.7285e+07	3.41672e+07	2.68455e+07	-13399.8	34054.5	-20654.7
1034.94	1098.76	-2055.22	2.77493e+07	2.053e+07	1.79482e+07	2.72937e+07	3.41553e+07	2.68404e+07	-14498.7	34147.5	-19648.8
1098.76	1162.3	-2070.71	2.77447e+07	2.04978e+07	1.79428e+07	2.73041e+07	3.41424e+07	2.68381e+07	-15555.1	34239.1	-18684
1162.3	1225.49	-2084.04	2.77384e+07	2.04666e+07	1.79393e+07	2.73161e+07	3.4129e+07	2.68386e+07	-16610.9	34281.3	-17670.3
1225.49	1288.25	-2095.16	2.773e+07	2.04364e+07	1.7937e+07	2.73298e+07	3.41151e+07	2.68421e+07	-17640.8	34299	-16658.2
1288.25	1350.52	-2104.1	2.77196e+07	2.04071e+07	1.79361e+07	2.73451e+07	3.4101e+07	2.68485e+07	-18656.1	34278.2	-15622.2
1350.52	1406.37	-2099.75	2.77071e+07	2.0379e+07	1.79361e+07	2.73621e+07	3.40868e+07	2.68581e+07	-19162.2	34773.6	-15611.3
1406.37	1455.94	-2082.55	2.76936e+07	2.03537e+07	1.79423e+07	2.73769e+07	3.4076e+07	2.68689e+07	-19909	34938.9	-15029.9
1455.94	1505	-2063.55	2.76788e+07	2.03295e+07	1.79506e+07	2.73907e+07	3.40668e+07	2.68797e+07	-20981.1	34681.7	-13700.6
1505	1553.32	-2042.49	2.76624e+07	2.03049e+07	1.79568e+07	2.7406e+07	3.40567e+07	2.68913e+07	-21841	34604	-12763
1553.32	1600.9	-2019.55	2.76446e+07	2.02809e+07	1.79631e+07	2.74214e+07	3.4047e+07	2.69033e+07	-22776.4	34380.9	-11604.5
1600.9	1647.57	-1994.71	2.76256e+07	2.0257e+07	1.79684e+07	2.74374e+07	3.40372e+07	2.69158e+07	-23636.1	34190.3	-10554.2
1647.57	1693.21	-1968.09	2.76056e+07	2.02337e+07	1.79733e+07	2.74531e+07	3.40274e+07	2.69286e+07	-24507.6	33940.3	-9432.64
1693.21	1737.55	-1939.87	2.75848e+07	2.02108e+07	1.79778e+07	2.74679e+07	3.40174e+07	2.69415e+07	-25360.1	33689.7	-8329.57
1737.55	1780.17	-1910.4	2.75639e+07	2.01883e+07	1.79824e+07	2.74801e+07	3.4007e+07	2.6954e+07	-26241.5	33423.9	-7182.39
1780.17	1820.33	-1880.34	2.75434e+07	2.01663e+07	1.79871e+07	2.74885e+07	3.39959e+07	2.69655e+07	-27185	33182.3	-5997.31
1820.33	1845.75	-1840.31	2.75237e+07	2.01458e+07	1.79914e+07	2.74946e+07	3.39853e+07	2.6976e+07	-28312.9	34018.9	-5706.04
1845.75	1855.01	-1792.41	2.7505e+07	2.01413e+07	1.80053e+07	2.75069e+07	3.39882e+07	2.69778e+07	-29625.2	34401	-4775.85
1855.01	1859.28	-1746.78	2.74838e+07	2.01254e+07	1.80212e+07	2.75082e+07	3.39834e+07	2.69717e+07	-30697.1	33931	-3233.87
1859.28	1860.21	-1701.37	2.74605e+07	2.01023e+07	1.80316e+07	2.7516e+07	3.39742e+07	2.69623e+07	-31500.1	33699.8	-2199.72
1860.21	1858.77	-1655.48	2.74344e+07	2.00762e+07	1.80422e+07	2.75283e+07	3.39629e+07	2.69473e+07	-32232.6	33213.8	-981.185
1858.77	1855.36	-1608.59	2.74051e+07	2.0044e+07	1.80512e+07	2.75441e+07	3.39467e+07	2.69281e+07	-32864.5	32779.5	84.9961
1855.36	1850.29	-1560.48	2.73724e+07	2.00079e+07	1.80604e+07	2.75636e+07	3.39263e+07	2.6904e+07	-33448.6	32251.1	1197.48
1850.29	1843.68	-1510.96	2.73362e+07	1.99664e+07	1.80696e+07	2.75851e+07	3.39002e+07	2.68757e+07	-33977.2	31718.5	2258.72
1843.68	1835.62	-1459.97	2.73019e+07	1.9939e+07	1.80794e+07	2.76276e+07	3.38776e+07	2.68429e+07	-34465.9	31139.8	3326.17
1835.62	1826.15	-1407.45	2.7265e+07	1.99079e+07	1.809e+07	2.76709e+07	3.38484e+07	2.68059e+07	-34913.9	30541.9	4371.99
1826.15	1802.1	-1346.59	2.72255e+07	1.98741e+07	1.81018e+07	2.77155e+07	3.38126e+07	2.67645e+07	-35920.9	31143	4777.84
1802.1	1763.96	-1277.65	2.71846e+07	1.98483e+07	1.81193e+07	2.77669e+07	3.37731e+07	2.67141e+07	-36575.2	31062.6	5512.54
1763.96	1724.79	-1207.41	2.71402e+07	1.98228e+07	1.81407e+07	2.78222e+07	3.37249e+07	2.66552e+07	-36771.5	30082	6689.51
1724.79	1684.26	-1135.72	2.70907e+07	1.97888e+07	1.81636e+07	2.78765e+07	3.36641e+07	2.65908e+07	-37164.8	29557.1	7607.69
1684.26	1642.53	-1062.71	2.70369e+07	1.97521e+07	1.81897e+07	2.79317e+07	3.35919e+07	2.65196e+07	-37401.6	28756.1	8645.43
1642.53	1599.47	-988.366	2.69784e+07	1.97104e+07	1.82187e+07	2.79861e+07	3.35072e+07	2.64426e+07	-37672.3	28074.5	9597.76
1599.47	1555.11	-912.738	2.69153e+07	1.96659e+07	1.82513e+07	2.804e+07	3.34098e+07	2.63596e+07	-37873.5	27298.9	10574.6
1555.11	1509.4	-835.858	2.68478e+07	1.96182e+07	1.82875e+07	2.80924e+07	3.32993e+07	2.62709e+07	-38060.7	26544.4	11516.2
1509.4	1462.34	-757.776	2.67758e+07	1.95684e+07	1.83279e+07	2.81432e+07	3.31755e+07	2.61767e+07	-38203	25748.9	12454.1
1462.34	1413.88	-678.542	2.66994e+07	1.95168e+07	1.83726e+07	2.81919e+07	3.30379e+07	2.60774e+07	-38317	24945.6	13371.4
1413.88	1364.03	-598.226	2.66186e+07	1.9464e+07	1.84218e+07	2.82379e+07	3.28863e+07	2.59731e+07	-38393.4	24116	14277.4
1364.03	1338.03	-529.768	2.65335e+07	1.94107e+07	1.84757e+07	2.82809e+07	3.27206e+07	2.58642e+07	-37279.7	20912.2	16367.6
1338.03	1334.91	-472.698	2.64378e+07	1.93314e+07	1.85281e+07	2.83094e+07	3.25437e+07	2.57642e+07	-36745.9	18952.4	17793.5
1334.91	1329.56	-414.291	2.63386e+07	1.92448e+07	1.85809e+07	2.83291e+07	3.2362e+07	2.56701e+07	-37001	18651	18350
1329.56	1322.59	-354.983	2.62423e+07	1.91713e+07	1.86379e+07	2.83477e+07	3.2176e+07	2.55743e+07	-36771.6	17409.5	19362.1
1322.59	1313.69	-294.78	2.61453e+07	1.91e+07	1.8697e+07	2.83611e+07	3.1986e+07	2.54812e+07	-36746.7	16628.6	20118.1
1313.69	1303.14	-234.068	2.60497e+07	1.90363e+07	1.8759e+07	2.83712e+07	3.1792e+07	2.53888e+07	-36559.7	15547.5	21012.2
1303.14	1291.04	-173.287	2.59545e+07	1.8977e+07	1.88233e+07	2.8377e+07	3.15944e+07	2.52988e+07	-36417.4	14568.1	21849.3
1291.04	1277.83	-113.289	2.58601e+07	1.89235e+07	1.88898e+07	2.8379e+07	3.13934e+07	2.5211e+07	-36223.2	13458.1	22765.1
1277.83	1264.11	-55.3903	2.57662e+07	1.88745e+07	1.8958e+07	2.83769e+07	3.11897e+07	2.51266e+07	-36052.6	12318.8	23733.9
1264.11	1250.9	-1.55745	2.56732e+07	1.88301e+07	1.90275e+07	2.83711e+07	3.09837e+07	2.50468e+07	-35894.1	11065	24829
1250.9	1258.42	51.9349	2.5581e+07	1.87892e+07	1.90973e+07	2.83616e+07	3.07765e+07	2.49734e+07	-33429.9	7946.89	25483
1258.42	1283.29	109.847	2.54758e+07	1.87394e+07	1.91684e+07	2.83375e+07	3.05753e+07	2.49012e+07	-31923.2	6039.65	25883.6
1283.29	1303.8	171.332	2.53684e+07	1.86909e+07	1.92414e+07	2.83056e+07	3.03809e+07	2.48283e+07	-31952.1	5498.19	26453.9
1303.8	1321.01	237.274	2.52706e+07	1.86529e+07	1.9316e+07	2.82743e+07	3.01903e+07	2.47575e+07	-32944.8	4131.58	28813.3
1321.01	1334.98	306.408	2.51922e+07	1.86191e+07	1.93923e+07	2.82491e+07	3.00056e+07	2.47028e+07	-32437.9	3143.67	29294.3
1334.98	1346.1	376.609	2.51203e+07	1.85918e+07	1.94716e+07	2.82228e+07	2.9826e+07	2.46489e+07	-31842.6	1900.29	29942.3
1346.1	1354.42	447.666	2.50543e+07	1.85687e+07	1.95539e+07	2.81957e+07	2.96522e+07	2.45973e+07	-31268.5	759.68	30508.8
1354.42	1360.03	519.356	2.49943e+07	1.85504e+07	1.96392e+07	2.81685e+07	2.94842e+07	2.45475e+07	-30619.1	-461.561	31080.6
1360.03	1362.94	591.588	2.49291e+07	1.85361e+07	1.97265e+07	2.81371e+07	2.93221e+07	2.44902e+07	-29978.1	-1657.21	31635.3
1362.94	1363.19	664.255	2.48598e+07	1.85259e+07	1.9815e+07	2.81031e+07	2.91659e+07	2.44269e+07	-29269.6	-2878.47	32148
1363.19	1337.72	716.052	2.47984e+07	1.85194e+07	1.99065e+07	2.80718e+07	2.90155e+07	2.43687e+07	-32845.2	-1938.78	34784
1337.72	1287.35	747.818	2.47714e+07	1.85227e+07	2.00037e+07	2.80506e+07	2.88649e+07	2.43356e+07	-34134.4	-2154.41	36288.9
1287.35	1235.02	780.707	2.47568e+07	1.8532e+07	2.01033e+07	2.80305e+07	2.87147e+07	2.43152e+07	-32307.7	-3897.44	36205.1
1235.02	1180.28	811.901	2.47325e+07	1.85429e+07	2.02022e+07	2.80055e+07	2.85681e+07	2.42928e+07	-30159.8	-4800.94	34960.7
1180.28	1123.45	842.059	2.46919e+07	1.85578e+07	2.02972e+07	2.79746e+07	2.84233e+07	2.42609e+07	-29122.6	-6133.26	35255.8
1123.45	1064.4	872.805	2.46476e+07	1.85753e+07	2.03917e+07	2.79409e+07	2.82815e+07	2.42316e+07	-28459.3	-7204.12	35663.4
1064.4	1003.28	904.108	2.46027e+07	1.85963e+07	2.04861e+07	2.79051e+07	2.81421e+07	2.42065e+07	-27577.9	-8385.02	35962.9
1003.28	940.11	935.876	2.45557e+07	1.86204e+07	2.05804e+07	2.78671e+07	2.80056e+07	2.41848e+07	-26798.3	-9472.04	36270.3
940.11	874.983	968.041	2.45077e+07	1.86481e+07	2.06746e+07	2.78269e+07	2.78719e+07	2.41668e+07	-25950.1	-10572.1	36522.2
874.983	807.961	1000.52	2.44585e+07	1.86794e+07	2.07688e+07	2.77847e+07	2.7741e+07	2.41522e+07	-25126.2	-11624.4	36750.6
807.961	748.449	1041.9	2.44085e+07	1.87146e+07	2.08629e+07	2.77405e+07	2.7613e+07	2.4141e+07	-22601	-13528.5	36129.5
748.449	696.193	1091.77	2.43621e+07	1.87553e+07	2.09576e+07	2.76935e+07	2.74853e+07	2.41349e+07	-20976.2	-14932	35908.3
696.193	642.033	1141.39	2.43168e+07	1.88013e+07	2.10519e+07	2.76427e+07	2.73585e+07	2.4133e+07	-20539.6	-15688.7	36228.3
642.033	586.273	1190.85	2.42689e+07	1.88518e+07	2.11449e+07	2.75882e+07	2.72339e+07	2.41339e+07	-19447.1	-16749.2	36196.3
586.273	528.889	1239.97	2.42205e+07	1.89074e+07	2.1237e+07	2.75297e+07	2.71109e+07	2.41379e+07	-18690.1	-17600.4	36290.5
528.889	470.045	1288.7	2.41712e+07	1.89681e+07	2.13278e+07	2.74673e+07	2.69899e+07	2.41445e+07	-17736.5	-18518.2	36254.8
470.045	409.835	1336.91	2.41217e+07	1.90341e+07	2.14175e+07	2.7401e+07	2.68707e+07	2.41538e+07	-16872.2	-19354.9	36227.1
409.835	348.432	1384.51	2.40722e+07	1.91057e+07	2.15059e+07	2.73307e+07	2.67534e+07	2.41655e+07	-15942.6	-20192.4	36135
348.432	286.053	1431.31	2.40233e+07	1.91829e+07	2.15929e+07	2.72564e+07	2.6638e+07	2.41794e+07	-15028.5	-20992.3	36020.8
286.053	223.042	1477.12	2.39751e+07	1.92658e+07	2.16785e+07	2.71782e+07	2.65247e+07	2.41954e+07	-14081.6	-21786.5	35868.1
223.042	153.27	1512.23	2.39282e+07	1.93543e+07	2.17627e+07	2.7096e+07	2.64137e+07	2.42135e+07	-14616.9	-21954.6	36571.5
153.27	80.4067	1535.22	2.38816e+07	1.94476e+07	2.18458e+07	2.70106e+07	2.63076e+07	2.42339e+07	-14193.3	-22721.4	36914.8
80.4067	16.6308	1552.59	2.38351e+07	1.95445e+07	2.19278e+07	2.69231e+07	2.6209e+07	2.42568e+07	-12515.6	-24262.1	36777.7
16.6308	-35.1307	1562.55	2.37887e+07	1.96439e+07	2.20087e+07	2.68347e+07	2.6121e+07	2.42824e+07	-11361.7	-25634	36995.8
-35.1307	-77.3156	1566.46	2.37425e+07	1.9744e+07	2.20883e+07	2.67472e+07	2.60467e+07	2.43105e+07	-10034.2	-26819.3	36853.5
-77.3156	-114.544	1566.61	2.36982e+07	1.98441e+07	2.21644e+07	2.66609e+07	2.59844e+07	2.43395e+07	-9006.49	-27626.8	36633.3
-114.544	-151.652	1566.76	2.36572e+07	1.99442e+07	2.22297e+07	2.6576e+07	2.59254e+07	2.43647e+07	-7917.11	-30657.9	38575
-151.652	-188.776	1566.47	2.36199e+07	2.0042e+07	2.22971e+07	2.64929e+07	2.58851e+07	2.43933e+07	-6906.12	-30854.1	37760.2
-188.776	-224.682	1564.17	2.35867e+07	2.01379e+07	2.23598e+07	2.64117e+07	2.58545e+07	2.44207e+07	-5878.45	-31672.4	37550.9
-224.682	-260.293	1560.49	2.35575e+07	2.02312e+07	2.24161e+07	2.63325e+07	2.58313e+07	2.44455e+07	-4879.62	-32171.1	37050.7
-260.293	-295.736	1555.39	2.35325e+07	2.03213e+07	2.24668e+07	2.62554e+07	2.5816e+07	2.44677e+07	-3874.51	-32693.2	36567.8
-295.736	-333.716	1553.69	2.35117e+07	2.04075e+07	2.25111e+07	2.61803e+07	2.58065e+07	2.44866e+07	-2666.6	-33002.3	35668.9
-333.716	-374.207	1555.19	2.34828e+07	2.04903e+07	2.25487e+07	2.61204e+07	2.58147e+07	2.45019e+07	-1569.04	-33299.8	34868.9
-374.207	-414.021	1554.41	2.34541e+07	2.05697e+07	2.25877e+07	2.60725e+07	2.58351e+07	2.45173e+07	-622.136	-33028.1	33650.3
-414.021	-451.408	1549.64	2.34358e+07	2.0643e+07	2.26141e+07	2.60261e+07	2.5837e+07	2.45286e+07	412.951	-31707.4	31294.5
-451.408	-488.64	1543.06	2.34231e+07	2.07109e+07	2.26239e+07	2.5983e+07	2.58195e+07	2.45363e+07	1401.69	-33050.6	31648.9
-488.64	-526.701	1535.63	2.34159e+07	2.0779e+07	2.26404e+07	2.59412e+07	2.58038e+07	2.45473e+07	2417.5	-32919.8	30502.3
-526.701	-565.033	1526.8	2.34116e+07	2.08467e+07	2.26542e+07	2.59025e+07	2.57827e+07	2.45601e+07	3425.15	-33551.2	30126.1
-565.033	-603.896	1516.83	2.34102e+07	2.09156e+07	2.26718e+07	2.58659e+07	2.5762e+07	2.45765e+07	4440.61	-33737.6	29297
-603.896	-643.1	1505.53	2.34109e+07	2.09855e+07	2.26901e+07	2.58318e+07	2.57396e+07	2.45962e+07	5455.87	-34131	28675.2
-643.1	-682.689	1492.95	2.34134e+07	2.10569e+07	2.27109e+07	2.58e+07	2.57172e+07	2.46199e+07	6473.61	-34379.6	27906
-682.689	-729.425	1491.97	2.34174e+07	2.11297e+07	2.27331e+07	2.57707e+07	2.56944e+07	2.46478e+07	8060.22	-34033.3	25973.1
-729.425	-783.017	1502.08	2.34283e+07	2.12059e+07	2.27726e+07	2.57333e+07	2.56806e+07	2.46779e+07	9341.48	-33973.1	24631.6
-783.017	-836.596	1510.33	2.34435e+07	2.1282e+07	2.2817e+07	2.56901e+07	2.5672e+07	2.47061e+07	10213.1	-34363.6	24150.5
-836.596	-890.286	1517	2.34591e+07	2.13548e+07	2.28531e+07	2.56473e+07	2.56628e+07	2.4732e+07	11304.5	-34471.8	23167.3
-890.286	-943.932	1521.89	2.34769e+07	2.14257e+07	2.28876e+07	2.5602e+07	2.56559e+07	2.47553e+07	12276.9	-34693	22416.1
-943.932	-997.524	1525.06	2.34959e+07	2.14937e+07	2.29173e+07	2.55558e+07	2.56496e+07	2.47761e+07	13310.1	-34813.3	21503.3
-997.524	-1050.97	1526.45	2.35165e+07	2.1559e+07	2.29441e+07	2.55081e+07	2.56448e+07	2.47941e+07	14306.4	-34947.4	20641.1
-1050.97	-1104.2	1526.05	2.35386e+07	2.16212e+07	2.29671e+07	2.54594e+07	2.56408e+07	2.48094e+07	15317	-35033.5	19716.6
-1104.2	-1157.14	1523.87	2.35621e+07	2.16803e+07	2.29872e+07	2.54097e+07	2.5638e+07	2.48217e+07	16314.2	-35104.7	18790.5
-1157.14	-1209.67	1519.92	2.3587e+07	2.17361e+07	2.30043e+07	2.53593e+07	2.56362e+07	2.48312e+07	17314.3	-35144.6	17830.3
-1209.67	-1266.16	1522.25	2.36132e+07	2.17887e+07	2.30185e+07	2.53083e+07	2.56354e+07	2.48375e+07	18637.5	-34742.8	16105.2
-1266.16	-1326.37	1530.54	2.3637e+07	2.18325e+07	2.30126e+07	2.52683e+07	2.56274e+07	2.48504e+07	19769.2	-34533.1	14764
-1326.37	-1385.75	1536.79	2.3659e+07	2.18734e+07	2.29989e+07	2.5236e+07	2.56173e+07	2.48718e+07	20655.2	-34594.3	13939
-1385.75	-1444.22	1541.3	2.36805e+07	2.19171e+07	2.29914e+07	2.52045e+07	2.56109e+07	2.48976e+07	21676.1	-34472.3	12796.2
-1444.22	-1501.41	1544.16	2.37007e+07	2.19604e+07	2.29825e+07	2.51775e+07	2.56055e+07	2.49303e+07	22642.7	-34420.5	11777.8
-1501.41	-1556.93	1545.75	2.37197e+07	2.20048e+07	2.29757e+07	2.51528e+07	2.56028e+07	2.49685e+07	23678.1	-34314.7	10636.7
-1556.93	-1610.59	1546.13	2.37372e+07	2.20492e+07	2.29686e+07	2.51313e+07	2.56022e+07	2.50132e+07	24667.3	-34197.1	9529.77
-1610.59	-1662.64	1545	2.37534e+07	2.20936e+07	2.29626e+07	2.51106e+07	2.56039e+07	2.50632e+07	25594.5	-34006.1	8411.56
-1662.64	-1713.31	1542.08	2.37689e+07	2.21372e+07	2.29577e+07	2.5088e+07	2.56072e+07	2.51179e+07	26465.3	-33773.7	7308.47
-1713.31	-1762.71	1537.2	2.37845e+07	2.21804e+07	2.29539e+07	2.50615e+07	2.56128e+07	2.51762e+07	27296.3	-33494.7	6198.34
-1762.71	-1784.33	1515.94	2.38006e+07	2.22242e+07	2.29499e+07	2.50326e+07	2.56215e+07	2.52378e+07	29231.6	-35655.5	6423.92
-1784.33	-1779.05	1478.94	2.38161e+07	2.22923e+07	2.29597e+07	2.5019e+07	2.56474e+07	2.5289e+07	30545.1	-36461	5915.91
-1779.05	-1773.12	1440.47	2.38277e+07	2.23527e+07	2.2974e+07	2.50034e+07	2.56728e+07	2.53302e+07	31017.5	-35471.1	4453.52
-1773.12	-1765.91	1400.13	2.38339e+07	2.23881e+07	2.29821e+07	2.498e+07	2.56886e+07	2.53691e+07	31889.5	-35405.1	3515.61
-1765.91	-1757.79	1358.09	2.38364e+07	2.24208e+07	2.29901e+07	2.49661e+07	2.57049e+07	2.54013e+07	32492.7	-34795.6	2302.84
-1757.79	-1748.56	1314.23	2.38339e+07	2.24398e+07	2.29953e+07	2.49529e+07	2.5716e+07	2.54292e+07	33187.3	-34436.4	1249.05
-1748.56	-1738.29	1268.61	2.3827e+07	2.24518e+07	2.29998e+07	2.49444e+07	2.5724e+07	2.54514e+07	33778.5	-33898.9	120.397
-1738.29	-1726.91	1221.21	2.38151e+07	2.2454e+07	2.30031e+07	2.49382e+07	2.57271e+07	2.54685e+07	34370.5	-33415.8	-954.732
-1726.91	-1714.42	1172.06	2.38023e+07	2.24614e+07	2.30061e+07	2.49476e+07	2.57293e+07	2.54803e+07	34906	-32861.1	-2044.86
-1714.42	-1700.76	1121.17	2.37879e+07	2.24693e+07	2.30089e+07	2.49664e+07	2.57278e+07	2.54868e+07	35414.5	-32303.6	-3110.89
-1700.76	-1712.8	1082.36	2.37687e+07	2.24673e+07	2.30119e+07	2.49833e+07	2.57196e+07	2.54881e+07	34653.8	-29196.2	-5457.61
-1712.8	-1749.49	1055.09	2.37444e+07	2.24399e+07	2.30066e+07	2.49905e+07	2.57042e+07	2.54973e+07	34510	-27414.5	-7095.51
-1749.49	-1784.08	1025.72	2.37185e+07	2.24022e+07	2.29975e+07	2.49905e+07	2.56881e+07	2.55121e+07	35196.4	-27386.7	-7809.68
-1784.08	-1817.16	994.635	2.36953e+07	2.2375e+07	2.29908e+07	2.49938e+07	2.56747e+07	2.55249e+07	35366.9	-26357.8	-9009.07
-1817.16	-1848.31	961.677	2.36724e+07	2.23472e+07	2.29832e+07	2.49949e+07	2.56627e+07	2.55398e+07	35746.1	-25815.4	-9930.65
-1848.31	-1877.67	926.984	2.36513e+07	2.23247e+07	2.29763e+07	2.49968e+07	2.56526e+07	2.55544e+07	35942.7	-24957.6	-10985.1
-1877.67	-1905.06	890.545	2.36314e+07	2.23044e+07	2.29693e+07	2.49979e+07	2.56444e+07	2.55699e+07	36167.1	-24217.5	-11949.6
-1905.06	-1930.5	852.428	2.36132e+07	2.22878e+07	2.29623e+07	2.49992e+07	2.56382e+07	2.55855e+07	36305.7	-23362.9	-12942.8
-1930.5	-1953.89	812.66	2.35965e+07	2.2274e+07	2.29552e+07	2.50003e+07	2.56339e+07	2.56017e+07	36419.7	-22519.9	-13899.9
-1953.89	-1975.2	771.293	2.35816e+07	2.22634e+07	2.2948e+07	2.50013e+07	2.56316e+07	2.56181e+07	36476.3	-21622.2	-14854.1
-1975.2	-1994.36	728.368	2.35684e+07	2.22556e+07	2.29405e+07	2.50023e+07	2.56314e+07	2.56349e+07	36493.6	-20706.6	-15787
-1994.36	-2009.14	682.813	2.35571e+07	2.22507e+07	2.29327e+07	2.50032e+07	2.56334e+07	2.56518e+07	36562.7	-19960.2	-16602.5
-2009.14	-2019.58	634.72	2.35504e+07	2.22602e+07	2.29275e+07	2.50094e+07	2.5633e+07	2.56612e+07	36535.8	-19079.1	-17456.7
-2019.58	-2027.81	585.252	2.35452e+07	2.22756e+07	2.2924e+07	2.50179e+07	2.56283e+07	2.56652e+07	36393.1	-18024.6	-18368.5
-2027.81	-2033.74	534.436	2.35381e+07	2.22878e+07	2.29207e+07	2.5025e+07	2.56209e+07	2.56683e+07	36247.2	-17024.7	-19222.5
-2033.74	-2037.38	482.341	2.35311e+07	2.23015e+07	2.29184e+07	2.50324e+07	2.56097e+07	2.56682e+07	36039	-15959	-20080.1
-2037.38	-2038.68	429.028	2.35233e+07	2.23144e+07	2.29168e+07	2.50391e+07	2.55953e+07	2.56663e+07	35802.3	-14893.8	-20908.5
-2038.68	-2037.65	374.575	2.3515e+07	2.23278e+07	2.2916e+07	2.50454e+07	2.55773e+07	2.5662e+07	35521.1	-13795.7	-21725.4
-2037.65	-2034.27	319.08	2.35062e+07	2.23414e+07	2.29158e+07	2.50509e+07	2.55557e+07	2.56559e+07	35206.6	-12683.6	-22523
-2034.27	-2028.58	262.674	2.34969e+07	2.23553e+07	2.29165e+07	2.50557e+07	2.55306e+07	2.56478e+07	34856.5	-11548.7	-23307.8
-2028.58	-2020.63	205.555	2.34871e+07	2.23697e+07	2.29177e+07	2.50596e+07	2.55019e+07	2.56381e+07	34476.8	-10394.5	-24082.2
-2020.63	-1991.96	140.414	2.34769e+07	2.23844e+07	2.29197e+07	2.50626e+07	2.54698e+07	2.56271e+07	35095.9	-10952	-24144
-1991.96	-1944.87	70.6993	2.34611e+07	2.23876e+07	2.29209e+07	2.50605e+07	2.54437e+07	2.5622e+07	35266.9	-10419.9	-24847
-1944.87	-1900.48	8.99456	2.34441e+07	2.2387e+07	2.2921e+07	2.5056e+07	2.54234e+07	2.56191e+07	34829.7	-8471.96	-26357.7
-1900.48	-1859.44	-42.7598	2.34305e+07	2.23923e+07	2.29204e+07	2.50521e+07	2.54036e+07	2.56121e+07	34778.1	-7171.52	-27606.6
-1859.44	-1820.67	-86.9542	2.34182e+07	2.23982e+07	2.29195e+07	2.50478e+07	2.53865e+07	2.56033e+07	34372.8	-5638.87	-28733.9
-1820.67	-1782.09	-129.993	2.33986e+07	2.24063e+07	2.29174e+07	2.50392e+07	2.5371e+07	2.55813e+07	36365.5	-4413.06	-31952.4
-1782.09	-1742.88	-172.166	2.33931e+07	2.24148e+07	2.29162e+07	2.50369e+07	2.53577e+07	2.55712e+07	35058.3	-3107.7	-31950.6
-1742.88	-1702.45	-212.911	2.33875e+07	2.2424e+07	2.29147e+07	2.50344e+07	2.53465e+07	2.55567e+07	34941.9	-1898.34	-33043.6
-1702.45	-1660.46	-253.384	2.33858e+07	2.24331e+07	2.29136e+07	2.50338e+07	2.53375e+07	2.55428e+07	34188.7	-676.987	-33511.7
-1660.46	-1616.67	-293.748	2.33859e+07	2.2442e+07	2.29126e+07	2.50344e+07	2.53308e+07	2.55275e+07	33694.9	511.656	-34206.6
-1616.67	-1574.7	-337.619	2.33884e+07	2.24505e+07	2.29119e+07	2.50367e+07	2.53265e+07	2.55119e+07	32398.4	2044.56	-34442.9
-1574.7	-1534.35	-382.313	2.3401e+07	2.24621e+07	2.29119e+07	2.50423e+07	2.53196e+07	2.55008e+07	29129.3	3376.72	-32506
-1534.35	-1491.83	-426.125	2.33959e+07	2.24746e+07	2.29049e+07	2.50433e+07	2.5311e+07	2.54725e+07	29417.6	4447.24	-33864.8
-1491.83	-1447.2	-470.769	2.33929e+07	2.24852e+07	2.28971e+07	2.50445e+07	2.53035e+07	2.54506e+07	28257.8	5641.23	-33899.1
-1447.2	-1400.42	-515.798	2.33989e+07	2.24952e+07	2.2891e+07	2.50469e+07	2.52957e+07	2.54393e+07	27846.7	6753.7	-34600.4
-1400.42	-1351.54	-561.417	2.34085e+07	2.2504e+07	2.28855e+07	2.50492e+07	2.52885e+07	2.54337e+07	27006.2	7893.19	-34899.4
-1351.54	-1300.58	-607.461	2.34137e+07	2.25118e+07	2.28778e+07	2.50503e+07	2.52815e+07	2.54259e+07	26369.4	8999.72	-35369.1
-1300.58	-1247.57	-653.945	2.34185e+07	2.25184e+07	2.28694e+07	2.50505e+07	2.52751e+07	2.54199e+07	25597.2	10104.3	-35701.4
-1247.57	-1192.56	-700.777	2.34209e+07	2.2524e+07	2.28596e+07	2.50497e+07	2.52691e+07	2.54136e+07	24871.8	11187.9	-36059.7
-1192.56	-1135.59	-747.913	2.3422e+07	2.25286e+07	2.28489e+07	2.50478e+07	2.52638e+07	2.5408e+07	24096	12259.7	-36355.7
-1135.59	-1088.53	-806.249	2.34212e+07	2.25322e+07	2.28371e+07	2.5045e+07	2.5259e+07	2.54027e+07	21194.8	14415.8	-35610.5
-1088.53	-1051.03	-875.305	2.34042e+07	2.25301e+07	2.28219e+07	2.50446e+07	2.52645e+07	2.53907e+07	19406.1	15966.2	-35372.3
-1051.03	-1011.39	-944.036	2.33822e+07	2.25243e+07	2.28069e+07	2.505e+07	2.52779e+07	2.53756e+07	19127.3	16710.8	-35838.1
-1011.39	-969.953	-1012.6	2.33671e+07	2.25173e+07	2.27955e+07	2.50605e+07	2.52934e+07	2.53626e+07	18001.6	17865.3	-35866.9
-969.953	-926.61	-1080.78	2.3352e+07	2.25078e+07	2.2786e+07	2.5077e+07	2.53142e+07	2.53493e+07	17295.7	18771.9	-36067.6
-926.61	-881.5	-1148.57	2.334e+07	2.24964e+07	2.27795e+07	2.5099e+07	2.53383e+07	2.53371e+07	16330.3	19783.7	-36113.9
-881.5	-834.637	-1215.86	2.3329e+07	2.24827e+07	2.27753e+07	2.51272e+07	2.53665e+07	2.53256e+07	15470.8	20707.8	-36178.6
-834.637	-786.105	-1282.57	2.33196e+07	2.24668e+07	2.2774e+07	2.51615e+07	2.53983e+07	2.53152e+07	14522.4	21646.9	-36169.3
-786.105	-735.951	-1348.62	2.3311e+07	2.24487e+07	2.27752e+07	2.52019e+07	2.54337e+07	2.53059e+07	13590.7	22543.1	-36133.8
-735.951	-684.247	-1413.93	2.33032e+07	2.24284e+07	2.27793e+07	2.52487e+07	2.54724e+07	2.5298e+07	12620.7	23426.1	-36046.9
-684.247	-622.662	-1470.6	2.32957e+07	2.24059e+07	2.27861e+07	2.53018e+07	2.55142e+07	2.52915e+07	13155.7	23494.6	-36650.4
-622.662	-551.583	-1518.83	2.32991e+07	2.23833e+07	2.27989e+07	2.53545e+07	2.55515e+07	2.52903e+07	12858.5	23959.9	-36818.3
-551.583	-479.438	-1566.34	2.33058e+07	2.23606e+07	2.28142e+07	2.54062e+07	2.55863e+07	2.52918e+07	11466	24954.6	-36420.6
-479.438	-406.161	-1612.87	2.33078e+07	2.23374e+07	2.28288e+07	2.54601e+07	2.56231e+07	2.52934e+07	10645.3	25621.1	-36266.4
-406.161	-332.04	-1658.37	2.33095e+07	2.23141e+07	2.28445e+07	2.55141e+07	2.56588e+07	2.52964e+07	9499.59	26424.6	-35924.2
-332.04	-257.318	-1702.61	2.33089e+07	2.22909e+07	2.28603e+07	2.55689e+07	2.56942e+07	2.53e+07	8507.68	27124.2	-35631.8
-257.318	-182.547	-1745.32	2.33076e+07	2.22683e+07	2.28767e+07	2.56236e+07	2.57276e+07	2.53044e+07	7403.26	27869.1	-35272.3
-182.547	-106.515	-1788.1	2.33053e+07	2.22468e+07	2.28931e+07	2.56778e+07	2.57578e+07	2.53095e+07	6313.18	30435.8	-36749
-106.515	-31.3572	-1829.76	2.33029e+07	2.22277e+07	2.2925e+07	2.57305e+07	2.57997e+07	2.53231e+07	5122.34	31480.8	-36603.1
-31.3572	38.3889	-1867.03	2.3299e+07	2.22122e+07	2.29607e+07	2.57821e+07	2.58403e+07	2.53386e+07	3860.89	32420.2	-36281.1
38.3889	103.078	-1900.06	2.32929e+07	2.21976e+07	2.2978e+07	2.58336e+07	2.58581e+07	2.53463e+07	2650.63	33371.6	-36022.2
103.078	165.105	-1929.71	2.3285e+07	2.21859e+07	2.30063e+07	2.58851e+07	2.58863e+07	2.53595e+07	1556.13	33996.3	-35552.5
165.105	225.873	-1956.7	2.32768e+07	2.21754e+07	2.30333e+07	2.59353e+07	2.59107e+07	2.5373e+07	467.662	34637.7	-35105.4
225.873	284.059	-1979.64	2.3268e+07	2.21673e+07	2.3067e+07	2.59844e+07	2.59405e+07	2.53896e+07	-615.459	33275.6	-32660.1
284.059	340.087	-1998.77	2.32584e+07	2.21614e+07	2.31036e+07	2.60327e+07	2.59721e+07	2.54076e+07	-1679.95	33522.9	-31842.9
340.087	396.199	-2016.2	2.32483e+07	2.21541e+07	2.31291e+07	2.60798e+07	2.59912e+07	2.5423e+07	-2735.23	34025.4	-31290.1
396.199	452.548	-2032.06	2.32377e+07	2.21496e+07	2.31609e+07	2.61257e+07	2.60155e+07	2.54406e+07	-3783.79	34321.6	-30537.8
452.548	509.062	-2046.27	2.32268e+07	2.21452e+07	2.31893e+07	2.61703e+07	2.60353e+07	2.5458e+07	-4825.2	34666	-29840.8
509.062	565.734	-2058.82	2.32157e+07	2.21423e+07	2.32195e+07	2.62135e+07	2.60558e+07	2.54763e+07	-5859.52	34922.7	-29063.1
565.734	622.487	-2069.68	2.32045e+07	2.214e+07	2.32486e+07	2.62553e+07	2.6074e+07	2.54949e+07	-6885.78	35167.1	-28281.3
622.487	679.262	-2078.8	2.31931e+07	2.21387e+07	2.3278e+07	2.62955e+07	2.60914e+07	2.5514e+07	-7903.73	35358.5	-27454.7
679.262	735.961	-2086.11	2.31816e+07	2.2138e+07	2.33069e+07	2.6334e+07	2.61072e+07	2.55335e+07	-8910.62	35521.7	-26611.1
735.961	792.513	-2091.57	2.31726e+07	2.2139e+07	2.33431e+07	2.63665e+07	2.61261e+07	2.55524e+07	-9908.44	35641.4	-25733
792.513	848.853	-2095.18	2.31651e+07	2.21396e+07	2.33806e+07	2.63937e+07	2.6146e+07	2.55686e+07	-10896	35725.4	-24829.3
848.853	904.905	-2096.9	2.31574e+07	2.21383e+07	2.3413e+07	2.64184e+07	2.61635e+07	2.55819e+07	-11871.7	35770.7	-23899.1
904.905	960.588	-2096.7	2.31504e+07	2.21356e+07	2.34437e+07	2.64391e+07	2.61803e+07	2.5592e+07	-12834.8	35780.3	-22945.5
960.588	1015.83	-2094.55	2.31438e+07	2.21309e+07	2.34712e+07	2.64567e+07	2.61952e+07	2.5599e+07	-13785	35752.5	-21967.5
1015.83	1070.55	-2090.41	2.31377e+07	2.21244e+07	2.34964e+07	2.64709e+07	2.62088e+07	2.56025e+07	-14721.1	35689.7	-20968.6
1070.55	1124.68	-2084.26	2.31322e+07	2.21158e+07	2.35191e+07	2.64819e+07	2.62206e+07	2.56026e+07	-15643	35590.7	-19947.7
1124.68	1178.14	-2076.08	2.31272e+07	2.2105e+07	2.35395e+07	2.64897e+07	2.62307e+07	2.55992e+07	-16549.4	35457.9	-18908.4
1178.14	1230.87	-2065.85	2.31228e+07	2.2092e+07	2.35578e+07	2.64944e+07	2.6239e+07	2.55922e+07	-17440.6	35290.3	-17849.6
1230.87	1279.66	-2047.63	2.31189e+07	2.20765e+07	2.35741e+07	2.64962e+07	2.62454e+07	2.55815e+07	-18055.3	35383.1	-17327.8
1279.66	1324.56	-2021.63	2.31147e+07	2.20576e+07	2.35848e+07	2.64975e+07	2.62483e+07	2.5569e+07	-18793.5	35285.5	-16492
1324.56	1368.63	-1993.76	2.31103e+07	2.20362e+07	2.35927e+07	2.64978e+07	2.62486e+07	2.55552e+07	-19701.4	34949.4	-15247.9
1368.63	1411.72	-1963.87	2.31061e+07	2.20135e+07	2.36006e+07	2.64958e+07	2.62474e+07	2.5539e+07	-20491.8	34696.7	-14204.9
1411.72	1453.8	-1932.06	2.31017e+07	2.19888e+07	2.36073e+07	2.64923e+07	2.62443e+07	2.55212e+07	-21319.2	34356.5	-13037.3
1453.8	1494.75	-1898.33	2.30972e+07	2.19625e+07	2.36136e+07	2.64871e+07	2.62395e+07	2.55013e+07	-22104.2	34023.8	-11919.7
1494.75	1534.45	-1862.78	2.30926e+07	2.19343e+07	2.36191e+07	2.64805e+07	2.62328e+07	2.54796e+07	-22895.9	33653.4	-10757.5
1534.45	1572.68	-1825.55	2.30878e+07	2.19043e+07	2.36241e+07	2.64724e+07	2.62245e+07	2.5456e+07	-23683.7	33278.7	-9595.02
1572.68	1609.06	-1786.97	2.30827e+07	2.18724e+07	2.36286e+07	2.64632e+07	2.62145e+07	2.54306e+07	-24503.9	32900.3	-8396.4
1609.06	1642.87	-1747.68	2.30774e+07	2.18389e+07	2.36327e+07	2.64528e+07	2.62028e+07	2.54033e+07	-25396.3	32549.6	-7153.33
1642.87	1687.65	-1726.18	2.30718e+07	2.18036e+07	2.36365e+07	2.64414e+07	2.61894e+07	2.53741e+07	-26680.4	30883.8	-4203.4
1687.65	1743.94	-1720.73	2.30656e+07	2.17524e+07	2.36212e+07	2.64312e+07	2.61654e+07	2.53609e+07	-27522.5	29787.9	-2265.44
1743.94	1800.11	-1712.41	2.30593e+07	2.16971e+07	2.36003e+07	2.6416e+07	2.61384e+07	2.53609e+07	-29075.3	30641.8	-1566.48
1800.11	1857.26	-1701.83	2.30546e+07	2.16607e+07	2.35871e+07	2.64036e+07	2.61209e+07	2.53636e+07	-30709.5	30888.2	-178.613
1857.26	1913.23	-1688.78	2.30535e+07	2.16371e+07	2.35725e+07	2.63966e+07	2.61102e+07	2.5375e+07	-30772.5	29927.6	844.897
1913.23	1967.41	-1673.45	2.30549e+07	2.16184e+07	2.35598e+07	2.6381e+07	2.61035e+07	2.53917e+07	-31612.6	29543.3	2069.29
1967.41	2020.03	-1655.83	2.30602e+07	2.16087e+07	2.35464e+07	2.6365e+07	2.61031e+07	2.54155e+07	-32050.9	28862.5	3188.34
2020.03	2069.11	-1635.94	2.30693e+07	2.16059e+07	2.35329e+07	2.63456e+07	2.61091e+07	2.54454e+07	-31149.5	26793.3	4356.2
2069.11	2114.6	-1613.77	2.30792e+07	2.15974e+07	2.35183e+07	2.63115e+07	2.61182e+07	2.54817e+07	-31335	25844	5491.01
2114.6	2158.24	-1589.45	2.30918e+07	2.15923e+07	2.35026e+07	2.62733e+07	2.61343e+07	2.55241e+07	-32009.8	25367.7	6642.07
2158.24	2188.29	-1556.94	2.31085e+07	2.15946e+07	2.34854e+07	2.62361e+07	2.61591e+07	2.55726e+07	-32920.5	25713.6	7206.83
2188.29	2205.07	-1516.51	2.31286e+07	2.16007e+07	2.3466e+07	2.61975e+07	2.61923e+07	2.56276e+07	-33663.2	25589.4	8073.88
2205.07	2220.4	-1474.26	2.31529e+07	2.1612e+07	2.34443e+07	2.61591e+07	2.6235e+07	2.56889e+07	-33910.3	24581.1	9329.14
2220.4	2233.93	-1430.07	2.31813e+07	2.16279e+07	2.34203e+07	2.61209e+07	2.62875e+07	2.57561e+07	-34379.4	24026.7	10352.7
2233.93	2245.83	-1384.07	2.32142e+07	2.16483e+07	2.33937e+07	2.60835e+07	2.63502e+07	2.5829e+07	-34681.9	23205.1	11476.8
2245.83	2255.99	-1336.29	2.32514e+07	2.16726e+07	2.33644e+07	2.60471e+07	2.64236e+07	2.59075e+07	-35025.7	22505.3	12520.4
2255.99	2264.43	-1286.79	2.32932e+07	2.17003e+07	2.33321e+07	2.6012e+07	2.65078e+07	2.59912e+07	-35296.6	21718.4	13578.2
2264.43	2271.13	-1235.62	2.33397e+07	2.17308e+07	2.32967e+07	2.59784e+07	2.66031e+07	2.60799e+07	-35554.8	20956.9	14597.8
2271.13	2276.06	-1182.85	2.33907e+07	2.17637e+07	2.3258e+07	2.59468e+07	2.67099e+07	2.61733e+07	-35765.7	20161.1	15604.7
2276.06	2279.22	-1128.53	2.34465e+07	2.17985e+07	2.32158e+07	2.59174e+07	2.68282e+07	2.62712e+07	-35946.6	19362.6	16584
2279.22	2280.59	-1072.73	2.3507e+07	2.18345e+07	2.317e+07	2.58904e+07	2.69583e+07	2.63732e+07	-36086.4	18545.3	17541
2280.59	2292.01	-1021.58	2.35721e+07	2.18714e+07	2.31205e+07	2.58661e+07	2.71002e+07	2.6479e+07	-35648.8	16611.5	19037.3
2292.01	2313.01	-974.887	2.36443e+07	2.19187e+07	2.30698e+07	2.58493e+07	2.72507e+07	2.65819e+07	-35459.3	15256.4	20202.9
2313.01	2331.82	-926.715	2.37208e+07	2.19693e+07	2.30171e+07	2.58377e+07	2.74079e+07	2.6683e+07	-35615.6	14675.1	20940.4
2331.82	2348.7	-877.277	2.37989e+07	2.20148e+07	2.29611e+07	2.58285e+07	2.7573e+07	2.6786e+07	-35520.1	13650.6	21869.5
2348.7	2363.48	-826.557	2.38799e+07	2.20589e+07	2.29024e+07	2.58232e+07	2.77451e+07	2.68885e+07	-35494.3	12839.6	22654.7
2363.48	2376.21	-774.666	2.39631e+07	2.20993e+07	2.28408e+07	2.58211e+07	2.79245e+07	2.69912e+07	-35364	11888.8	23475.2
2376.21	2386.84	-721.649	2.40486e+07	2.2137e+07	2.27765e+07	2.58226e+07	2.81107e+07	2.7093e+07	-35222.9	10988.7	24234.2
2386.84	2395.37	-667.585	2.41361e+07	2.21714e+07	2.27097e+07	2.58277e+07	2.83037e+07	2.71935e+07	-35020	10037.9	24982.1
2395.37	2401.77	-612.536	2.42256e+07	2.22027e+07	2.26405e+07	2.58363e+07	2.85028e+07	2.72915e+07	-34783.1	9091.18	25691.9
2401.77	2406.04	-556.573	2.43167e+07	2.22311e+07	2.25695e+07	2.58485e+07	2.87075e+07	2.73855e+07	-34497.1	8120.62	26376.5
2406.04	2381.79	-486.385	2.44093e+07	2.22568e+07	2.24974e+07	2.58642e+07	2.89167e+07	2.74735e+07	-35381.7	9600.73	25781
2381.79	2330.09	-402.711	2.45254e+07	2.23164e+07	2.24267e+07	2.58998e+07	2.91042e+07	2.75455e+07	-35581.5	9740.51	25841
2330.09	2277.26	-319.221	2.46469e+07	2.2386e+07	2.23576e+07	2.5944e+07	2.92702e+07	2.76089e+07	-34888.5	8108.61	26779.9
2277.26	2222.95	-236.179	2.47537e+07	2.24381e+07	2.22896e+07	2.5984e+07	2.94284e+07	2.76709e+07	-34642.5	7402.76	27239.7
2222.95	2168.09	-152.75	2.48405e+07	2.24887e+07	2.22225e+07	2.60171e+07	2.9571e+07	2.77115e+07	-36137.9	6136.98	30000.9
2168.09	2113.83	-71.986	2.49352e+07	2.25306e+07	2.21558e+07	2.60566e+07	2.97025e+07	2.77693e+07	-35657.5	5046.53	30611
2113.83	2062.58	-0.0107628	2.50218e+07	2.2568e+07	2.20893e+07	2.60935e+07	2.98213e+07	2.78235e+07	-35524.3	3640.31	31884
2062.58	2015.35	61.295	2.51027e+07	2.25981e+07	2.20222e+07	2.61282e+07	2.99305e+07	2.7882e+07	-35291.8	2296.04	32995.7
2015.35	1970.45	115.072	2.51773e+07	2.26229e+07	2.1953e+07	2.61593e+07	3.00305e+07	2.79444e+07	-34900.7	1073.67	33827.1
1970.45	1925.85	165.132	2.52439e+07	2.26436e+07	2.18803e+07	2.61851e+07	3.01215e+07	2.80088e+07	-34389.2	-24.7605	34414
1925.85	1877.86	211.144	2.53021e+07	2.26619e+07	2.18033e+07	2.62047e+07	3.02029e+07	2.80733e+07	-34263.6	-842.343	35106
1877.86	1826.12	252.98	2.53216e+07	2.26637e+07	2.17211e+07	2.62116e+07	3.0291e+07	2.81185e+07	-32932.4	-1767.43	34699.8
1826.12	1773.17	291.563	2.53169e+07	2.26569e+07	2.16355e+07	2.62135e+07	3.03833e+07	2.81428e+07	-30626.9	-2871.33	33498.2
1773.17	1718.74	329.316	2.53074e+07	2.26516e+07	2.15468e+07	2.62154e+07	3.04706e+07	2.81539e+07	-30818.2	-3854.14	34672.4
1718.74	1662.75	367.216	2.53213e+07	2.26428e+07	2.14635e+07	2.62223e+07	3.05578e+07	2.81836e+07	-29624.7	-4885.8	34510.5
1662.75	1605.13	404.912	2.53349e+07	2.26329e+07	2.13794e+07	2.623e+07	3.06422e+07	2.82065e+07	-29134	-5878.81	35012.8
1605.13	1545.87	442.682	2.53511e+07	2.26205e+07	2.12957e+07	2.6239e+07	3.07254e+07	2.82274e+07	-28229.3	-6880.1	35109.4
1545.87	1484.95	480.413	2.5368e+07	2.2606e+07	2.12116e+07	2.62491e+07	3.08064e+07	2.82437e+07	-27512.3	-7864.46	35376.8
1484.95	1422.38	518.167	2.53862e+07	2.25889e+07	2.11276e+07	2.62604e+07	3.08859e+07	2.8257e+07	-26662.9	-8845.07	35508
1422.38	1358.16	555.886	2.54051e+07	2.25693e+07	2.10433e+07	2.62728e+07	3.09636e+07	2.82666e+07	-25854.3	-9813.46	35667.8
1358.16	1300.69	601.277	2.54247e+07	2.25467e+07	2.09589e+07	2.62865e+07	3.10398e+07	2.82731e+07	-23494.9	-11554	35049
1300.69	1249.69	654.006	2.54459e+07	2.25217e+07	2.08746e+07	2.6301e+07	3.11137e+07	2.8277e+07	-21938.3	-12865.3	34803.6
1249.69	1196.88	706.316	2.5468e+07	2.2494e+07	2.07901e+07	2.63163e+07	3.11854e+07	2.82784e+07	-21430	-13609.7	35039.7
1196.88	1142.5	758.317	2.54895e+07	2.2463e+07	2.07053e+07	2.63323e+07	3.12556e+07	2.82769e+07	-20326.7	-14643.9	34970.7
1142.5	1086.48	809.866	2.55107e+07	2.24289e+07	2.06203e+07	2.6349e+07	3.13241e+07	2.82727e+07	-19513.6	-15505.2	35018.9
1086.48	1028.9	860.955	2.55311e+07	2.23914e+07	2.05352e+07	2.63666e+07	3.13912e+07	2.8266e+07	-18516.3	-16440.5	34956.8
1028.9	969.787	911.499	2.55508e+07	2.23506e+07	2.045e+07	2.63848e+07	3.14569e+07	2.82568e+07	-17591.8	-17315.5	34907.3
969.787	909.189	961.458	2.55695e+07	2.23064e+07	2.0365e+07	2.64039e+07	3.15213e+07	2.82453e+07	-16603.3	-18200	34803.3
909.189	847.146	1010.76	2.55873e+07	2.2259e+07	2.02801e+07	2.64239e+07	3.15844e+07	2.82315e+07	-15626.6	-19055.3	34681.9
847.146	783.713	1059.37	2.5604e+07	2.22083e+07	2.01956e+07	2.64446e+07	3.16461e+07	2.82156e+07	-14622.2	-19899.7	34521.9
783.713	715.538	1104.04	2.56195e+07	2.21545e+07	2.01116e+07	2.6466e+07	3.17062e+07	2.81976e+07	-14226.1	-20405	34631.1
715.538	642.804	1144.85	2.56268e+07	2.20968e+07	2.00257e+07	2.64926e+07	3.17678e+07	2.81739e+07	-13486.4	-21062	34548.4
642.804	568.958	1184.9	2.56313e+07	2.20366e+07	1.99402e+07	2.65239e+07	3.18263e+07	2.81463e+07	-12301.4	-21924.7	34226
568.958	494.013	1224.03	2.564e+07	2.19764e+07	1.98575e+07	2.65559e+07	3.18745e+07	2.81166e+07	-11343.4	-22644.3	33987.7
494.013	418.142	1262.21	2.565e+07	2.19175e+07	1.9777e+07	2.65884e+07	3.19108e+07	2.8084e+07	-10251.7	-23411.3	33663
418.142	341.534	1299.28	2.5661e+07	2.18609e+07	1.97012e+07	2.66202e+07	3.19365e+07	2.80508e+07	-9217.73	-24128.4	33346.1
341.534	264.577	1335.05	2.5671e+07	2.18067e+07	1.96311e+07	2.66519e+07	3.19543e+07	2.80182e+07	-8133.17	-24862.8	32996
264.577	187.224	1369.86	2.56797e+07	2.17579e+07	1.95508e+07	2.6683e+07	3.19419e+07	2.79751e+07	-7042.63	-26232.7	33275.4
187.224	109.043	1404.82	2.56866e+07	2.17106e+07	1.94838e+07	2.67137e+07	3.1935e+07	2.79395e+07	-5892.23	-28728	34620.2
109.043	34.7346	1436.6	2.56913e+07	2.16657e+07	1.94348e+07	2.67444e+07	3.19396e+07	2.79142e+07	-4643.71	-28947.6	33591.3
34.7346	-31.136	1462.38	2.56931e+07	2.16244e+07	1.93875e+07	2.67762e+07	3.19358e+07	2.7889e+07	-3282.26	-30585.8	33868.1
-31.136	-87.5964	1478.72	2.56911e+07	2.15858e+07	1.93511e+07	2.68104e+07	3.19394e+07	2.78697e+07	-2207.8	-30782.5	32990.3
-87.5964	-136.048	1485.49	2.56893e+07	2.15484e+07	1.93175e+07	2.68439e+07	3.19389e+07	2.78522e+07	-1134.02	-30118	31252
-136.048	-181.745	1489.15	2.56869e+07	2.15102e+07	1.92771e+07	2.68769e+07	3.19265e+07	2.7832e+07	50.7314	-31573	31522.3
-181.745	-226.645	1491.04	2.5682e+07	2.14731e+07	1.92494e+07	2.69114e+07	3.19306e+07	2.7818e+07	1115.05	-31730.7	30615.7
-226.645	-270.916	1491.06	2.5676e+07	2.14381e+07	1.92345e+07	2.69461e+07	3.19483e+07	2.78097e+07	2209.92	-32484.4	30274.5
-270.916	-315.164	1489.61	2.56685e+07	2.14027e+07	1.92152e+07	2.69816e+07	3.19587e+07	2.78001e+07	3262.24	-32835.1	29572.8
-315.164	-359.464	1486.68	2.56601e+07	2.13686e+07	1.92005e+07	2.70174e+07	3.19724e+07	2.77923e+07	4318.89	-33335.8	29016.9
-359.464	-404	1482.37	2.56507e+07	2.13348e+07	1.91852e+07	2.70536e+07	3.19835e+07	2.77849e+07	5356.61	-33696.4	28339.8
-404	-448.783	1476.69	2.56404e+07	2.13018e+07	1.9172e+07	2.70901e+07	3.19949e+07	2.77786e+07	6390.33	-34077.8	27687.4
-448.783	-493.844	1469.66	2.56294e+07	2.12694e+07	1.91594e+07	2.71268e+07	3.20049e+07	2.7773e+07	7411.84	-34396.6	26984.8
-493.844	-540.467	1463.75	2.56176e+07	2.12378e+07	1.91481e+07	2.71635e+07	3.20143e+07	2.77684e+07	8536.15	-34576.3	26040.1
-540.467	-588.572	1458.85	2.56079e+07	2.12077e+07	1.91448e+07	2.71955e+07	3.20279e+07	2.77648e+07	9590.38	-34781.8	25191.4
-588.572	-636.807	1452.47	2.55991e+07	2.11776e+07	1.91443e+07	2.72237e+07	3.20433e+07	2.77597e+07	10556.6	-35046.6	24490.1
-636.807	-685.147	1444.63	2.55897e+07	2.11462e+07	1.91405e+07	2.72509e+07	3.20566e+07	2.77521e+07	11554.2	-35230.2	23676
-685.147	-733.51	1435.28	2.55805e+07	2.11142e+07	1.91366e+07	2.72755e+07	3.20695e+07	2.77422e+07	12518.9	-35407.6	22888.7
-733.51	-781.838	1424.41	2.55714e+07	2.1081e+07	1.91313e+07	2.72984e+07	3.2081e+07	2.77299e+07	13483.8	-35538.9	22055.1
-781.838	-830.053	1411.99	2.55626e+07	2.10471e+07	1.91255e+07	2.73189e+07	3.20915e+07	2.77152e+07	14431	-35644.9	21213.9
-830.053	-878.076	1398.02	2.55542e+07	2.10122e+07	1.91191e+07	2.73374e+07	3.21005e+07	2.76978e+07	15369.2	-35715.1	20345.9
-878.076	-925.815	1382.47	2.55462e+07	2.09764e+07	1.91123e+07	2.73536e+07	3.21081e+07	2.76779e+07	16294.8	-35755.1	19460.2
-925.815	-973.162	1365.38	2.55386e+07	2.09397e+07	1.91053e+07	2.73676e+07	3.2114e+07	2.76553e+07	17211.4	-35764.1	18552.7
-973.162	-1019.29	1345.55	2.55316e+07	2.0902e+07	1.90982e+07	2.73793e+07	3.21183e+07	2.763e+07	18070.9	-35808	17737.1
-1019.29	-1064.01	1323.15	2.55265e+07	2.08655e+07	1.9098e+07	2.73845e+07	3.21248e+07	2.75994e+07	18965.1	-35797.1	16832.1
-1064.01	-1107.59	1299.69	2.5523e+07	2.08279e+07	1.91002e+07	2.73849e+07	3.21313e+07	2.75622e+07	19923	-35729.8	15806.8
-1107.59	-1149.42	1275.62	2.55203e+07	2.07872e+07	1.90995e+07	2.73837e+07	3.21347e+07	2.75195e+07	20918.9	-35694.1	14775.2
-1149.42	-1188.5	1251.81	2.55185e+07	2.07445e+07	1.90989e+07	2.73804e+07	3.21366e+07	2.74706e+07	22037.6	-35679.1	13641.5
-1188.5	-1223.35	1229.51	2.55172e+07	2.06995e+07	1.90969e+07	2.73773e+07	3.21365e+07	2.74165e+07	23317.9	-35736.6	12418.7
-1223.35	-1253.15	1209.43	2.55156e+07	2.06528e+07	1.90942e+07	2.73761e+07	3.21348e+07	2.73574e+07	24629.5	-35782	11152.4
-1253.15	-1278.81	1190.61	2.55133e+07	2.06038e+07	1.90906e+07	2.73785e+07	3.21312e+07	2.72943e+07	25721.5	-35696.5	9974.98
-1278.81	-1301.68	1171.7	2.55096e+07	2.05519e+07	1.90874e+07	2.73836e+07	3.21248e+07	2.72273e+07	26646.3	-35501.1	8854.79
-1301.68	-1322.45	1152.02	2.55044e+07	2.04966e+07	1.90851e+07	2.73906e+07	3.21149e+07	2.71567e+07	27497	-35248.9	7751.96
-1322.45	-1350.88	1136.42	2.54973e+07	2.04376e+07	1.90841e+07	2.73993e+07	3.21009e+07	2.70827e+07	27895	-34062.6	6167.59
-1350.88	-1386.92	1124.35	2.54895e+07	2.03534e+07	1.90711e+07	2.73924e+07	3.20641e+07	2.70157e+07	28439.2	-33298.6	4859.39
-1386.92	-1421.43	1110.34	2.54829e+07	2.0263e+07	1.90546e+07	2.73757e+07	3.20189e+07	2.69562e+07	29212.7	-33116.4	3903.7
-1421.43	-1457.48	1094.53	2.54781e+07	2.01861e+07	1.90443e+07	2.73599e+07	3.19799e+07	2.6899e+07	32175.2	-34917.4	2742.21
-1457.48	-1493.64	1076.76	2.54781e+07	2.0133e+07	1.90347e+07	2.73632e+07	3.19533e+07	2.68472e+07	32122.5	-33808.8	1686.26
-1493.64	-1528.09	1056.97	2.54802e+07	2.0083e+07	1.90281e+07	2.73579e+07	3.19264e+07	2.67992e+07	33033.7	-33608.6	574.953
-1528.09	-1561.31	1035.15	2.54856e+07	2.00417e+07	1.90229e+07	2.7353e+07	3.19031e+07	2.67559e+07	33511.4	-32996.4	-515.039
-1561.31	-1590.29	1011.19	2.54939e+07	2.00068e+07	1.90195e+07	2.73453e+07	3.18826e+07	2.67169e+07	31826.9	-30216.6	-1610.28
-1590.29	-1616.29	985.129	2.5499e+07	1.99567e+07	1.9017e+07	2.73145e+07	3.18557e+07	2.66824e+07	32964.4	-30256.3	-2708.12
-1616.29	-1641	957.058	2.55078e+07	1.99178e+07	1.90155e+07	2.72887e+07	3.18353e+07	2.66524e+07	33133.2	-29321.7	-3811.5
-1641	-1656.39	923.064	2.55176e+07	1.98806e+07	1.90144e+07	2.72592e+07	3.18179e+07	2.66269e+07	34124	-29579.9	-4544.08
-1656.39	-1662.87	883.336	2.55328e+07	1.98761e+07	1.90241e+07	2.72468e+07	3.18128e+07	2.6593e+07	34624.4	-29152.1	-5472.36
-1662.87	-1667.9	841.781	2.55476e+07	1.98813e+07	1.90393e+07	2.72422e+07	3.18084e+07	2.65523e+07	34989.1	-28335.2	-6653.91
-1667.9	-1671.29	798.335	2.55584e+07	1.98756e+07	1.90529e+07	2.72363e+07	3.17974e+07	2.65123e+07	35376	-27688.9	-7687.16
-1671.29	-1673.08	753.085	2.55672e+07	1.98702e+07	1.90687e+07	2.72336e+07	3.1783e+07	2.64691e+07	35698.8	-26910.8	-8787.96
-1673.08	-1673.19	706.043	2.55729e+07	1.98597e+07	1.9085e+07	2.72316e+07	3.17635e+07	2.6425e+07	36002.2	-26165.8	-9836.36
-1673.19	-1671.6	657.268	2.55763e+07	1.98474e+07	1.91027e+07	2.72314e+07	3.17394e+07	2.63789e+07	36261.3	-25364.9	-10896.3
-1671.6	-1668.27	606.8	2.55769e+07	1.98321e+07	1.91217e+07	2.72322e+07	3.17102e+07	2.63315e+07	36488.1	-24557.8	-11930.3
-1668.27	-1663.17	554.701	2.55752e+07	1.9815e+07	1.91422e+07	2.72343e+07	3.1676e+07	2.62826e+07	36675.7	-23717.6	-12958.1
-1663.17	-1656.27	501.037	2.55712e+07	1.9796e+07	1.91643e+07	2.72373e+07	3.16366e+07	2.62325e+07	36826.9	-22860.1	-13966.7
-1656.27	-1647.57	445.895	2.55649e+07	1.97758e+07	1.91882e+07	2.72412e+07	3.15918e+07	2.61813e+07	36940.4	-21976.3	-14964.1
-1647.57	-1657.7	399.755	2.55564e+07	1.97546e+07	1.92139e+07	2.72458e+07	3.15417e+07	2.61291e+07	36058.9	-19146.1	-16912.8
-1657.7	-1685.83	362.196	2.55412e+07	1.97133e+07	1.92367e+07	2.72426e+07	3.14894e+07	2.60861e+07	35646.1	-17331	-18315.1
-1685.83	-1711.37	322.871	2.55246e+07	1.96658e+07	1.9258e+07	2.72362e+07	3.14393e+07	2.60499e+07	35873.5	-16870.5	-19002.9
-1711.37	-1734.81	282.093	2.55116e+07	1.96274e+07	1.92807e+07	2.72324e+07	3.13911e+07	2.60144e+07	35690.1	-15639.5	-20050.6
-1734.81	-1755.81	239.767	2.54995e+07	1.95896e+07	1.93033e+07	2.72282e+07	3.13455e+07	2.59828e+07	35662.1	-14788.1	-20874
-1755.81	-1774.51	196.021	2.549e+07	1.95568e+07	1.93263e+07	2.72251e+07	3.13022e+07	2.59532e+07	35485	-13696.3	-21788.7
-1774.51	-1790.79	150.864	2.54822e+07	1.95263e+07	1.93494e+07	2.72225e+07	3.12614e+07	2.59266e+07	35322.9	-12701.8	-22621.1
-1790.79	-1804.66	104.365	2.54767e+07	1.94994e+07	1.93727e+07	2.72207e+07	3.1223e+07	2.59023e+07	35088.4	-11623.7	-23464.7
-1804.66	-1816.07	56.5587	2.54733e+07	1.94752e+07	1.93962e+07	2.72195e+07	3.11874e+07	2.58804e+07	34828.7	-10562.9	-24265.8
-1816.07	-1824.99	7.4879	2.54721e+07	1.9454e+07	1.94197e+07	2.72191e+07	3.11543e+07	2.58607e+07	34519.4	-9466.96	-25052.5
-1824.99	-1817.04	-40.0534	2.5473e+07	1.94353e+07	1.94433e+07	2.72195e+07	3.11238e+07	2.5843e+07	35772.7	-9708.24	-26064.5
-1817.04	-1794	-83.6672	2.54799e+07	1.94159e+07	1.94646e+07	2.72235e+07	3.10977e+07	2.58362e+07	36237.5	-9092.05	-27145.5
-1794	-1770.91	-124.626	2.54889e+07	1.93974e+07	1.94835e+07	2.72287e+07	3.10762e+07	2.58368e+07	35534.6	-7502.34	-28032.2
-1770.91	-1746.65	-164.424	2.54958e+07	1.93837e+07	1.9501e+07	2.72324e+07	3.10573e+07	2.58354e+07	35476.8	-6497.84	-28979
-1746.65	-1720.97	-206.849	2.55035e+07	1.93742e+07	1.95178e+07	2.72362e+07	3.10404e+07	2.58333e+07	37628.1	-5213.6	-32414.5
-1720.97	-1693.53	-250.14	2.55363e+07	1.93678e+07	1.95351e+07	2.72517e+07	3.10248e+07	2.58517e+07	35865.4	-4097.04	-31768.4
-1693.53	-1664.23	-293.119	2.55373e+07	1.93633e+07	1.9553e+07	2.7252e+07	3.10107e+07	2.58379e+07	36029.2	-2903.52	-33125.6
-1664.23	-1632.89	-336.806	2.5553e+07	1.93604e+07	1.9572e+07	2.72588e+07	3.09978e+07	2.58357e+07	35195.2	-1765.18	-33430
-1632.89	-1599.46	-380.9	2.5564e+07	1.93586e+07	1.95915e+07	2.72639e+07	3.09863e+07	2.58271e+07	34794.3	-606.61	-34187.7
-1599.46	-1563.89	-425.407	2.55801e+07	1.93578e+07	1.96124e+07	2.72714e+07	3.09759e+07	2.58212e+07	33920.7	531.987	-34452.7
-1563.89	-1521.81	-463.334	2.55944e+07	1.93577e+07	1.96339e+07	2.72791e+07	3.09667e+07	2.5812e+07	31552	1264.68	-32816.7
-1521.81	-1473.34	-497.204	2.5597e+07	1.93644e+07	1.96519e+07	2.72836e+07	3.0953e+07	2.5788e+07	32664.5	2201.65	-34866.1
-1473.34	-1422.85	-532.301	2.56391e+07	1.93745e+07	1.96752e+07	2.7297e+07	3.09352e+07	2.57986e+07	31085	3424.52	-34509.5
-1422.85	-1370.27	-567.778	2.5661e+07	1.93837e+07	1.96945e+07	2.73042e+07	3.09168e+07	2.57965e+07	30917.6	4480.03	-35397.6
-1370.27	-1315.68	-604.011	2.56901e+07	1.93944e+07	1.97147e+07	2.73109e+07	3.08958e+07	2.58024e+07	29959.9	5607.62	-35567.5
-1315.68	-1259.08	-640.709	2.57116e+07	1.94054e+07	1.97325e+07	2.73143e+07	3.08734e+07	2.58049e+07	29394.9	6678.79	-36073.7
-1259.08	-1200.53	-677.934	2.57335e+07	1.94173e+07	1.97498e+07	2.73154e+07	3.08491e+07	2.581e+07	28588.3	7759.71	-36348
-1200.53	-1140.06	-715.549	2.57517e+07	1.943e+07	1.97653e+07	2.73136e+07	3.08231e+07	2.58143e+07	27881.2	8814.45	-36695.6
-1140.06	-1077.72	-753.522	2.57686e+07	1.94436e+07	1.97797e+07	2.7309e+07	3.07954e+07	2.58194e+07	27091	9859.91	-36950.9
-1077.72	-1013.57	-791.762	2.5783e+07	1.94581e+07	1.97925e+07	2.73015e+07	3.0766e+07	2.58243e+07	26316	10886.6	-37202.6
-1013.57	-956.083	-838.041	2.57957e+07	1.94736e+07	1.98038e+07	2.72909e+07	3.07351e+07	2.58293e+07	23984.7	12685.6	-36670.2
-956.083	-905.027	-891.985	2.58114e+07	1.9492e+07	1.9814e+07	2.7276e+07	3.06997e+07	2.58362e+07	22457.7	14046	-36503.8
-905.027	-852.067	-945.68	2.58271e+07	1.95127e+07	1.98222e+07	2.72559e+07	3.06605e+07	2.58442e+07	21993.8	14826.8	-36820.6
-852.067	-797.452	-999.214	2.58385e+07	1.95344e+07	1.98272e+07	2.72305e+07	3.06194e+07	2.58513e+07	20922.9	15895.8	-36818.7
-797.452	-741.127	-1052.42	2.58479e+07	1.95578e+07	1.98296e+07	2.71995e+07	3.05755e+07	2.58582e+07	20143.1	16783.3	-36926.4
-741.127	-683.203	-1105.26	2.58545e+07	1.95827e+07	1.9829e+07	2.7163e+07	3.05296e+07	2.58644e+07	19172.6	17742.4	-36915
-683.203	-623.706	-1157.63	2.58591e+07	1.96093e+07	1.98255e+07	2.71208e+07	3.04814e+07	2.58699e+07	18271.2	18635	-36906.2
-623.706	-562.715	-1209.46	2.58617e+07	1.96375e+07	1.9819e+07	2.70729e+07	3.04314e+07	2.58745e+07	17300.1	19535.6	-36835.7
-562.715	-500.293	-1260.65	2.58627e+07	1.96674e+07	1.98097e+07	2.70191e+07	3.03794e+07	2.5878e+07	16334.7	20403.1	-36737.8
-500.293	-436.531	-1311.13	2.58623e+07	1.9699e+07	1.97974e+07	2.69595e+07	3.03259e+07	2.58804e+07	15334.9	21260.9	-36595.8
-436.531	-370.461	-1359.73	2.58608e+07	1.97323e+07	1.97823e+07	2.6894e+07	3.02709e+07	2.58816e+07	14522.5	21996.1	-36518.5
-370.461	-302.334	-1406.32	2.58474e+07	1.97645e+07	1.97617e+07	2.68294e+07	3.0222e+07	2.58778e+07	13575.7	22779	-36354.7
-302.334	-233.592	-1451.75	2.58297e+07	1.97961e+07	1.97388e+07	2.67662e+07	3.01773e+07	2.58715e+07	12461.3	23632.1	-36093.4
-233.592	-164.82	-1495.63	2.58161e+07	1.98282e+07	1.97163e+07	2.67013e+07	3.01326e+07	2.58652e+07	11388.6	24465.2	-35853.8
-164.82	-97.1289	-1537.4	2.58022e+07	1.986e+07	1.96929e+07	2.66368e+07	3.00907e+07	2.58579e+07	10224.6	25371.2	-35595.8
-97.1289	-32.3795	-1576.04	2.57901e+07	1.98913e+07	1.96695e+07	2.65721e+07	3.00516e+07	2.58502e+07	9006.07	26374.1	-35380.2
-32.3795	27.072	-1610.34	2.57779e+07	1.99215e+07	1.96459e+07	2.65085e+07	3.00174e+07	2.58421e+07	7691.46	27508	-35199.4
27.072	81.4664	-1640.38	2.57661e+07	1.99496e+07	1.96222e+07	2.64466e+07	2.99897e+07	2.58336e+07	6421.54	28515.9	-34937.4
81.4664	133.195	-1667.38	2.57549e+07	1.9977e+07	1.95842e+07	2.63867e+07	2.99502e+07	2.5816e+07	5224.51	29326.8	-34551.4
133.195	183.756	-1692.07	2.57457e+07	2.00015e+07	1.95419e+07	2.63281e+07	2.99114e+07	2.57958e+07	4047.88	30059.7	-34107.6
183.756	236.136	-1716.98	2.57391e+07	2.00231e+07	1.94967e+07	2.62699e+07	2.98731e+07	2.57738e+07	2893.05	32511.9	-35404.9
236.136	278.002	-1718.34	2.57348e+07	2.00425e+07	1.94621e+07	2.62118e+07	2.98516e+07	2.57566e+07	2786.65	33223.7	-36010.4
278.002	306.716	-1693.93	2.57394e+07	2.00591e+07	1.94317e+07	2.61458e+07	2.98334e+07	2.57401e+07	2113.33	33021.1	-35134.4
306.716	335.57	-1668.22	2.57485e+07	2.00705e+07	1.93905e+07	2.60732e+07	2.98102e+07	2.57164e+07	693.423	34009.6	-34703
335.57	365.089	-1641.42	2.57567e+07	2.00791e+07	1.9358e+07	2.5999e+07	2.98127e+07	2.56928e+07	-313.682	34306.8	-33993.1
365.089	395.076	-1613.45	2.57669e+07	2.00841e+07	1.93207e+07	2.59207e+07	2.98184e+07	2.56631e+07	-1531.57	34931.2	-33399.7
395.076	425.683	-1584.39	2.57781e+07	2.00854e+07	1.92775e+07	2.58398e+07	2.98274e+07	2.56263e+07	-2622.93	35332.7	-32709.8
425.683	456.839	-1554.21	2.57911e+07	2.00831e+07	1.92297e+07	2.57556e+07	2.98391e+07	2.55824e+07	-3768.07	35808.9	-32040.8
456.839	488.566	-1522.91	2.5806e+07	2.00772e+07	1.91774e+07	2.56689e+07	2.98535e+07	2.55309e+07	-4868.11	36197.9	-31329.8
488.566	520.815	-1490.49	2.5823e+07	2.00677e+07	1.91212e+07	2.55794e+07	2.98704e+07	2.54717e+07	-5974.79	36587.1	-30612.4
520.815	553.555	-1456.93	2.58425e+07	2.00548e+07	1.90618e+07	2.54874e+07	2.98895e+07	2.54045e+07	-7058.38	36927.6	-29869.3
553.555	600.13	-1447.6	2.58646e+07	2.00386e+07	1.89995e+07	2.53929e+07	2.99106e+07	2.5329e+07	-9250.82	35995.1	-26744.3
600.13	659.964	-1461.49	2.58834e+07	2.00173e+07	1.89188e+07	2.53076e+07	2.99211e+07	2.52457e+07	-10824.7	35695.8	-24871.1
659.964	719.685	-1473.3	2.59022e+07	1.99951e+07	1.88335e+07	2.52288e+07	2.99268e+07	2.51602e+07	-11581.2	36254	-24672.8
719.685	779.55	-1483.58	2.59246e+07	1.99752e+07	1.87577e+07	2.51496e+07	2.9936e+07	2.50741e+07	-12755.4	36288	-23532.6
779.55	839.292	-1491.97	2.59488e+07	1.99559e+07	1.86838e+07	2.5074e+07	2.99443e+07	2.4987e+07	-13684.4	36544.8	-22860.4
839.292	898.922	-1498.63	2.59757e+07	1.99383e+07	1.8616e+07	2.49998e+07	2.99539e+07	2.4899e+07	-14721.5	36618.7	-21897.1
898.922	958.293	-1503.43	2.60048e+07	1.99221e+07	1.85519e+07	2.49281e+07	2.99636e+07	2.48104e+07	-15676.3	36728.9	-21052.5
958.293	1017.34	-1506.38	2.60363e+07	1.99077e+07	1.84927e+07	2.48585e+07	2.99739e+07	2.47212e+07	-16649.5	36755.5	-20106.1
1017.34	1075.94	-1507.45	2.607e+07	1.98951e+07	1.84378e+07	2.47912e+07	2.99846e+07	2.46315e+07	-17586.9	36764.1	-19177.2
1075.94	1133.98	-1506.64	2.61059e+07	1.98844e+07	1.83873e+07	2.47262e+07	2.99956e+07	2.45415e+07	-18517.8	36719	-18201.2
1133.98	1188.9	-1499.54	2.61441e+07	1.98756e+07	1.83411e+07	2.46634e+07	3.00068e+07	2.44512e+07	-19243.6	36868.9	-17625.3
1188.9	1240.56	-1486.42	2.61841e+07	1.98686e+07	1.82983e+07	2.46037e+07	3.00179e+07	2.43613e+07	-20073.4	36861.6	-16788.2
1240.56	1291	-1471.94	2.6226e+07	1.98636e+07	1.82591e+07	2.45473e+07	3.00289e+07	2.4272e+07	-21051	36672.7	-15621.7
1291	1339.62	-1456.38	2.62696e+07	1.98611e+07	1.82241e+07	2.4494e+07	3.00404e+07	2.41836e+07	-21995.2	36560.1	-14564.9
1339.62	1385.62	-1440.49	2.63145e+07	1.98609e+07	1.81927e+07	2.4445e+07	3.00523e+07	2.40964e+07	-23061.3	36416.2	-13354.9
1385.62	1427.7	-1425.3	2.63604e+07	1.98631e+07	1.81646e+07	2.44014e+07	3.0065e+07	2.4011e+07	-24241.1	36339	-12097.9
1427.7	1465.35	-1411.22	2.64065e+07	1.98679e+07	1.8139e+07	2.43656e+07	3.00787e+07	2.39282e+07	-25409.9	36210.6	-10800.7
1465.35	1499.43	-1397.34	2.64522e+07	1.98745e+07	1.81161e+07	2.4338e+07	3.00931e+07	2.38487e+07	-26380.8	35964	-9583.18
1499.43	1530.9	-1382.65	2.64968e+07	1.9882e+07	1.80963e+07	2.43172e+07	3.01072e+07	2.37728e+07	-27230.7	35624.8	-8394.13
1530.9	1560.27	-1366.63	2.65401e+07	1.98896e+07	1.80799e+07	2.43017e+07	3.01204e+07	2.37006e+07	-28005.7	35225.5	-7219.73
1560.27	1580.92	-1345.17	2.65818e+07	1.98966e+07	1.8067e+07	2.42898e+07	3.01319e+07	2.36319e+07	-29010.6	35412.9	-6402.28
1580.92	1593.23	-1318.24	2.66219e+07	1.99149e+07	1.80706e+07	2.42794e+07	3.01515e+07	2.35551e+07	-29825.6	35216.7	-5391.01
1593.23	1604.04	-1289.53	2.66604e+07	1.99343e+07	1.80819e+07	2.42723e+07	3.01715e+07	2.347e+07	-30400.7	34526.2	-4125.49
1604.04	1616.03	-1258.94	2.66954e+07	1.99351e+07	1.8091e+07	2.42599e+07	3.01783e+07	2.33826e+07	-33386.6	36373.6	-2987.06
1616.03	1628.18	-1226.45	2.67306e+07	1.9943e+07	1.81034e+07	2.42638e+07	3.01876e+07	2.32897e+07	-33406.2	35186.6	-1780.38
1628.18	1635.76	-1191.82	2.67634e+07	1.99432e+07	1.81164e+07	2.42702e+07	3.01896e+07	2.31934e+07	-31942.5	32569.6	-627.062
1635.76	1640.26	-1155.08	2.67875e+07	1.99182e+07	1.8132e+07	2.42587e+07	3.01747e+07	2.30926e+07	-32870.3	32313.2	557.11
1640.26	1643.35	-1116.29	2.6809e+07	1.98908e+07	1.81494e+07	2.4255e+07	3.01549e+07	2.29882e+07	-33160.5	31431.1	1729.45
1643.35	1644.79	-1075.45	2.68304e+07	1.98682e+07	1.81693e+07	2.42648e+07	3.01326e+07	2.288e+07	-33749.3	30846.5	2902.79
1644.79	1644.67	-1032.59	2.685e+07	1.98442e+07	1.81916e+07	2.42807e+07	3.01041e+07	2.27683e+07	-34132.8	30062.7	4070.03
1644.67	1662.83	-997.918	2.68652e+07	1.9813e+07	1.82167e+07	2.42961e+07	3.00664e+07	2.26532e+07	-33672.6	27489.4	6183.15
1662.83	1698.52	-971.063	2.68741e+07	1.97554e+07	1.82364e+07	2.43003e+07	3.00148e+07	2.25462e+07	-33615.9	25839.8	7776.02
1698.52	1731.9	-941.916	2.68807e+07	1.96881e+07	1.82549e+07	2.42974e+07	2.99581e+07	2.24462e+07	-34202.9	25520.3	8682.66
1731.9	1763.42	-910.766	2.68897e+07	1.96312e+07	1.82776e+07	2.42971e+07	2.99031e+07	2.2347e+07	-34390.7	24440.8	9949.96
1763.42	1792.77	-877.512	2.68984e+07	1.95737e+07	1.83014e+07	2.42945e+07	2.98469e+07	2.22522e+07	-34740.6	23732	11008.6
1792.77	1820.06	-842.268	2.69082e+07	1.95212e+07	1.83276e+07	2.42922e+07	2.9791e+07	2.21598e+07	-34949.1	22785	12164.2
1820.06	1845.17	-805.037	2.69183e+07	1.94703e+07	1.83553e+07	2.42889e+07	2.97351e+07	2.20711e+07	-35179.2	21930.8	13248.4
1845.17	1868.12	-765.888	2.69289e+07	1.94225e+07	1.83848e+07	2.42855e+07	2.96796e+07	2.19855e+07	-35342.2	20992.1	14350.1
1868.12	1888.85	-724.858	2.69398e+07	1.93765e+07	1.84156e+07	2.42816e+07	2.96246e+07	2.19033e+07	-35485.5	20067.1	15418.4
1888.85	1907.35	-682.007	2.6951e+07	1.93328e+07	1.84479e+07	2.42774e+07	2.95702e+07	2.18245e+07	-35583	19104.3	16478.7
1907.35	1923.59	-637.387	2.69625e+07	1.92909e+07	1.84814e+07	2.4273e+07	2.95168e+07	2.17491e+07	-35648.5	18134	17514.4
1923.59	1923.44	-583.861	2.6974e+07	1.92506e+07	1.8516e+07	2.42684e+07	2.94643e+07	2.16772e+07	-36320.7	18459.9	17860.8
1923.44	1907.4	-521.8	2.69912e+07	1.92321e+07	1.85562e+07	2.42721e+07	2.94091e+07	2.1598e+07	-36613.2	18066	18547.3
1907.4	1889.54	-458.469	2.70079e+07	1.92211e+07	1.86009e+07	2.42795e+07	2.93463e+07	2.15141e+07	-36408.7	16716.8	19691.9
1889.54	1869.53	-393.823	2.70185e+07	1.92015e+07	1.86479e+07	2.42846e+07	2.92763e+07	2.14318e+07	-36421.2	15867.5	20553.8
1869.53	1847.63	-328.16	2.70261e+07	1.91824e+07	1.86984e+07	2.42902e+07	2.91986e+07	2.1348e+07	-36268.6	14730.7	21538
1847.63	1823.88	-261.745	2.7029e+07	1.91596e+07	1.87521e+07	2.42947e+07	2.91136e+07	2.12648e+07	-36162.3	13727.7	22434.6
1823.88	1798.59	-195.146	2.70282e+07	1.91359e+07	1.88091e+07	2.42988e+07	2.9021e+07	2.11816e+07	-35998.2	12621.3	23376.9
1798.59	1772.18	-129.281	2.70233e+07	1.91106e+07	1.88695e+07	2.43018e+07	2.89211e+07	2.10995e+07	-35850.5	11521.6	24328.9
1772.18	1745.48	-65.7364	2.70148e+07	1.90845e+07	1.89332e+07	2.43039e+07	2.88141e+07	2.1019e+07	-35708.5	10337.7	25370.8
1745.48	1719.74	-6.92733	2.70029e+07	1.90575e+07	1.89997e+07	2.43051e+07	2.87004e+07	2.09418e+07	-35616.9	9077.16	26539.7
1719.74	1688.72	44.2099	2.69881e+07	1.90295e+07	1.90685e+07	2.43054e+07	2.85808e+07	2.08698e+07	-36300.6	8433.38	27867.2
1688.72	1652.42	88.1918	2.69674e+07	1.89864e+07	1.91365e+07	2.43027e+07	2.84647e+07	2.08165e+07	-36498.6	7481.01	29017.6
1652.42	1616.84	128.226	2.69426e+07	1.89383e+07	1.92019e+07	2.42976e+07	2.83541e+07	2.07786e+07	-36040.4	6129.22	29911.2
1616.84	1580.8	166.156	2.69156e+07	1.88968e+07	1.92641e+07	2.42907e+07	2.82453e+07	2.07477e+07	-35806.1	5091.62	30714.5
1580.8	1543.86	203.003	2.68845e+07	1.88573e+07	1.93226e+07	2.42809e+07	2.81408e+07	2.07264e+07	-35361.1	3941.62	31419.4
1543.86	1505.63	239.997	2.68322e+07	1.8823e+07	1.93752e+07	2.42611e+07	2.8039e+07	2.06972e+07	-35516.7	2890.44	32626.2
1505.63	1465.9	279.837	2.67811e+07	1.87931e+07	1.94235e+07	2.424e+07	2.794e+07	2.06784e+07	-37189.3	1814.57	35374.8
1465.9	1424.56	320.54	2.67436e+07	1.87697e+07	1.94702e+07	2.42212e+07	2.78419e+07	2.06752e+07	-35624.2	770.263	34853.9
1424.56	1381.54	361.077	2.66924e+07	1.87524e+07	1.95132e+07	2.41955e+07	2.77436e+07	2.06634e+07	-35661.2	-274.468	35935.7
1381.54	1336.77	402.198	2.6644e+07	1.874e+07	1.95556e+07	2.41682e+07	2.76451e+07	2.06557e+07	-34863	-1300.63	36163.6
1336.77	1294.63	444.83	2.65925e+07	1.87316e+07	1.95972e+07	2.41376e+07	2.75464e+07	2.06473e+07	-31243.6	-2734.31	33978
1294.63	1254.92	490.246	2.651e+07	1.87224e+07	1.96331e+07	2.40991e+07	2.74524e+07	2.06197e+07	-30878	-3933.44	34811.5
1254.92	1213.28	536.183	2.64396e+07	1.87147e+07	1.96729e+07	2.40627e+07	2.73627e+07	2.06017e+07	-30142.3	-4832.98	34975.3
1213.28	1169.83	582.373	2.63876e+07	1.87118e+07	1.97179e+07	2.40292e+07	2.72746e+07	2.05938e+07	-29561.5	-5882.46	35443.9
1169.83	1124.52	628.878	2.63326e+07	1.87118e+07	1.97633e+07	2.39959e+07	2.71896e+07	2.0582e+07	-28855.1	-6838.24	35693.3
1124.52	1077.42	675.571	2.62856e+07	1.87153e+07	1.98122e+07	2.3964e+07	2.71068e+07	2.05736e+07	-28174.2	-7830.98	36005.1
1077.42	1028.53	722.418	2.62408e+07	1.8722e+07	1.98627e+07	2.39335e+07	2.70268e+07	2.05647e+07	-27438.6	-8789.28	36227.9
1028.53	977.914	769.33	2.6201e+07	1.87317e+07	1.9916e+07	2.39044e+07	2.69494e+07	2.05574e+07	-26692.1	-9750.38	36442.5
977.914	925.587	816.245	2.61645e+07	1.87444e+07	1.99714e+07	2.38772e+07	2.68745e+07	2.05509e+07	-25912.2	-10693.3	36605.5
925.587	871.593	863.083	2.61319e+07	1.876e+07	2.00292e+07	2.38517e+07	2.68023e+07	2.05456e+07	-25111.7	-11627.9	36739.6
871.593	817.272	910.98	2.61027e+07	1.87782e+07	2.00892e+07	2.38283e+07	2.67326e+07	2.05413e+07	-24050.7	-12669.3	36720
817.272	762.623	959.815	2.60867e+07	1.88027e+07	2.01527e+07	2.38038e+07	2.66598e+07	2.05422e+07	-23092.7	-13633.2	36726
762.623	706.398	1008.3	2.60762e+07	1.88318e+07	2.02173e+07	2.37767e+07	2.65849e+07	2.05462e+07	-22278.8	-14496.2	36775
706.398	648.679	1056.4	2.6063e+07	1.88635e+07	2.0281e+07	2.37481e+07	2.65114e+07	2.05506e+07	-21352.1	-15391.5	36743.6
648.679	589.501	1104	2.60514e+07	1.88986e+07	2.03446e+07	2.37173e+07	2.64376e+07	2.05568e+07	-20451.8	-16246.7	36698.5
589.501	528.939	1151.05	2.60391e+07	1.89367e+07	2.04075e+07	2.36846e+07	2.63645e+07	2.05639e+07	-19504.2	-17100	36604.3
528.939	467.066	1197.44	2.60274e+07	1.8978e+07	2.04698e+07	2.36498e+07	2.62917e+07	2.05723e+07	-18550	-17931.3	36481.3
467.066	403.993	1243.09	2.60157e+07	1.90223e+07	2.05313e+07	2.36132e+07	2.62196e+07	2.05816e+07	-17567.7	-18752.3	36320
403.993	339.881	1287.86	2.60045e+07	1.90696e+07	2.05919e+07	2.35746e+07	2.61481e+07	2.0592e+07	-16568.1	-19560.8	36128.9
339.881	274.99	1331.58	2.59934e+07	1.91197e+07	2.06514e+07	2.35342e+07	2.60775e+07	2.06032e+07	-15542.6	-20366	35908.6
274.99	219.229	1384.9	2.59828e+07	1.91725e+07	2.07098e+07	2.34919e+07	2.60081e+07	2.06154e+07	-12588	-22062.6	34650.6
219.229	171.854	1447.58	2.59533e+07	1.92237e+07	2.07614e+07	2.34622e+07	2.5952e+07	2.0623e+07	-10665	-23209	33874
171.854	122.723	1509.06	2.59185e+07	1.92735e+07	2.08124e+07	2.34452e+07	2.59054e+07	2.06297e+07	-10111.6	-23660.1	33771.7
122.723	71.8526	1569.65	2.58929e+07	1.93238e+07	2.08682e+07	2.34338e+07	2.58605e+07	2.064e+07	-8807.1	-24430.8	33237.9
71.8526	18.6917	1629.39	2.58682e+07	1.93733e+07	2.09254e+07	2.34321e+07	2.58208e+07	2.0652e+07	-7903.08	-24953.4	32856.5
18.6917	-37.224	1688.61	2.58479e+07	1.94226e+07	2.09855e+07	2.34378e+07	2.57836e+07	2.06668e+07	-6789.01	-25521.2	32310.2
-37.224	-95.7796	1747.14	2.58295e+07	1.94712e+07	2.10472e+07	2.34519e+07	2.57493e+07	2.06842e+07	-5764.79	-26038.2	31803
-95.7796	-156.25	1804.63	2.58135e+07	1.95192e+07	2.1111e+07	2.34736e+07	2.57169e+07	2.07048e+07	-4646.04	-26608	31254
-156.25	-218.147	1860.79	2.57988e+07	1.95669e+07	2.1172e+07	2.35032e+07	2.56812e+07	2.07267e+07	-3543.74	-27155.3	30699
-218.147	-281.138	1915.44	2.57853e+07	1.96136e+07	2.12219e+07	2.35398e+07	2.5632e+07	2.07475e+07	-2409.48	-27702.2	30111.7
-281.138	-348.063	1971.43	2.57731e+07	1.96594e+07	2.1277e+07	2.35825e+07	2.55879e+07	2.07742e+07	-1283.44	-30722.2	32005.6
-348.063	-413.85	2021.02	2.57625e+07	1.97066e+07	2.13476e+07	2.36297e+07	2.55574e+07	2.08107e+07	-399.333	-30358.6	30757.9
-413.85	-476.821	2062.74	2.57528e+07	1.97558e+07	2.14191e+07	2.36804e+07	2.55224e+07	2.08521e+07	624.698	-31542.3	30917.6
-476.821	-540.7	2103.1	2.57427e+07	1.981e+07	2.15088e+07	2.3735e+07	2.55034e+07	2.09036e+07	1831.82	-31721.5	29889.7
-540.7	-604.888	2141.49	2.57313e+07	1.98667e+07	2.15928e+07	2.37935e+07	2.54738e+07	2.09593e+07	2936.89	-32261.9	29325
-604.888	-669.305	2177.88	2.57186e+07	1.99281e+07	2.16829e+07	2.38556e+07	2.54475e+07	2.10225e+07	4088.94	-32424	28335.1
-669.305	-731.161	2209.57	2.57042e+07	1.99927e+07	2.17713e+07	2.39214e+07	2.54165e+07	2.10921e+07	5210.98	-30621.5	25410.6
-731.161	-792.581	2238.69	2.56879e+07	2.00564e+07	2.18445e+07	2.39908e+07	2.53682e+07	2.11666e+07	6333.33	-32192.8	25859.5
-792.581	-854.76	2266.45	2.56696e+07	2.01257e+07	2.19274e+07	2.40634e+07	2.533e+07	2.12497e+07	7436.69	-31897.1	24460.4
-854.76	-916.951	2292.16	2.56492e+07	2.01967e+07	2.2006e+07	2.41393e+07	2.52875e+07	2.13404e+07	8534.63	-32564.7	24030
-916.951	-979.457	2316.16	2.56266e+07	2.02719e+07	2.20875e+07	2.42181e+07	2.5249e+07	2.14392e+07	9614.68	-32666.2	23051.5
-979.457	-1047.79	2349.16	2.56018e+07	2.03496e+07	2.21673e+07	2.42997e+07	2.52104e+07	2.15463e+07	11162.1	-32487.9	21325.8
-1047.79	-1121.75	2390.82	2.55728e+07	2.043e+07	2.22421e+07	2.43877e+07	2.51707e+07	2.16629e+07	12434.6	-32413	19978.4
-1121.75	-1195.49	2430.19	2.55403e+07	2.05139e+07	2.23145e+07	2.4481e+07	2.51307e+07	2.17907e+07	13347.2	-32774.4	19427.2
-1195.49	-1269.1	2467.56	2.55054e+07	2.06026e+07	2.23894e+07	2.45769e+07	2.50938e+07	2.19295e+07	14427.7	-32849.4	18421.7
-1269.1	-1342.42	2502.74	2.54673e+07	2.06952e+07	2.24633e+07	2.46766e+07	2.50586e+07	2.20797e+07	15391.9	-33028.2	17636.2
-1342.42	-1415.43	2535.83	2.54263e+07	2.07919e+07	2.25372e+07	2.47791e+07	2.50263e+07	2.22412e+07	16390.4	-33100.2	16709.8
-1415.43	-1488.05	2566.75	2.53821e+07	2.08925e+07	2.26098e+07	2.48843e+07	2.49969e+07	2.24143e+07	17341.1	-33178.6	15837.6
-1488.05	-1560.2	2595.54	2.53346e+07	2.09969e+07	2.2681e+07	2.4992e+07	2.49707e+07	2.25988e+07	18286.5	-33203	14916.5
-1560.2	-1631.82	2622.16	2.52837e+07	2.11048e+07	2.27501e+07	2.51017e+07	2.4948e+07	2.2795e+07	19202.6	-33205.6	14002.9
-1631.82	-1702.84	2646.64	2.52294e+07	2.12162e+07	2.28167e+07	2.52132e+07	2.49292e+07	2.30026e+07	20101.2	-33169.7	13068.5
-1702.84	-1766.63	2656.54	2.51715e+07	2.13308e+07	2.28803e+07	2.53261e+07	2.49145e+07	2.32217e+07	20430.1	-33717.1	13287
-1766.63	-1823.38	2652.37	2.51116e+07	2.14508e+07	2.29482e+07	2.54345e+07	2.49077e+07	2.34475e+07	21029.3	-33901	12871.7
-1823.38	-1879.56	2646.49	2.50495e+07	2.15733e+07	2.30146e+07	2.55396e+07	2.49068e+07	2.36791e+07	21995.4	-33617.5	11622.2
-1879.56	-1934.94	2638.62	2.49847e+07	2.16957e+07	2.30735e+07	2.56438e+07	2.49093e+07	2.39183e+07	22725	-33541.5	10816.5
-1934.94	-1989.55	2628.93	2.49179e+07	2.18191e+07	2.31281e+07	2.5744e+07	2.49165e+07	2.41632e+07	23540.7	-33307.6	9766.93
-1989.55	-2043.29	2617.35	2.48495e+07	2.19424e+07	2.3177e+07	2.58393e+07	2.49276e+07	2.44138e+07	24269.3	-33114.6	8845.28
-2043.29	-2096.13	2603.94	2.47804e+07	2.20658e+07	2.32215e+07	2.59262e+07	2.4943e+07	2.46684e+07	25003.3	-32854.8	7851.53
-2096.13	-2147.98	2588.69	2.47115e+07	2.21893e+07	2.32611e+07	2.60035e+07	2.49626e+07	2.49261e+07	25693	-32587.6	6894.62
-2147.98	-2198.81	2571.64	2.46435e+07	2.2314e+07	2.3295e+07	2.60718e+07	2.49877e+07	2.51861e+07	26365.3	-32281	5915.67
-2198.81	-2248.53	2552.81	2.45768e+07	2.24405e+07	2.33226e+07	2.61323e+07	2.50189e+07	2.54483e+07	27006.8	-31953.9	4947.07
-2248.53	-2288.33	2517.01	2.4512e+07	2.25689e+07	2.33435e+07	2.61854e+07	2.50569e+07	2.5712e+07	27019.9	-32411.9	5391.95
-2288.33	-2317.92	2465.4	2.44496e+07	2.27102e+07	2.33719e+07	2.6229e+07	2.51081e+07	2.59635e+07	27434.8	-32460.9	5026.15
-2317.92	-2344.71	2414.31	2.439e+07	2.2855e+07	2.33991e+07	2.62658e+07	2.51672e+07	2.6204e+07	28422.6	-31987.1	3564.43
-2344.71	-2368.45	2365.09	2.43334e+07	2.29941e+07	2.34146e+07	2.62997e+07	2.52296e+07	2.64412e+07	30862.2	-33402.7	2540.5
-2368.45	-2388.79	2318.77	2.42778e+07	2.31258e+07	2.34235e+07	2.63251e+07	2.52948e+07	2.66721e+07	32562	-33770.7	1208.7
-2388.79	-2403.27	2273.8	2.42255e+07	2.32651e+07	2.34233e+07	2.63635e+07	2.53679e+07	2.68997e+07	31508.6	-31691.8	183.16
-2403.27	-2412.71	2228.72	2.41694e+07	2.33824e+07	2.3417e+07	2.63816e+07	2.54382e+07	2.71224e+07	31688.5	-30833.9	-854.569
-2412.71	-2419.97	2182.94	2.41113e+07	2.3491e+07	2.34044e+07	2.63955e+07	2.55103e+07	2.73404e+07	32421.3	-30599.4	-1821.94
-2419.97	-2425.6	2136.15	2.40575e+07	2.36166e+07	2.33864e+07	2.64294e+07	2.55907e+07	2.75533e+07	32750.3	-29960	-2790.25
-2425.6	-2429.65	2088.17	2.40011e+07	2.3731e+07	2.33632e+07	2.64547e+07	2.56714e+07	2.77609e+07	33218.6	-29485.9	-3732.74
-2429.65	-2437.05	2041.39	2.39445e+07	2.3844e+07	2.33352e+07	2.64809e+07	2.57544e+07	2.79631e+07	33335.4	-28431	-4904.43
-2437.05	-2447.61	1995.66	2.38852e+07	2.39411e+07	2.32987e+07	2.64974e+07	2.58379e+07	2.81651e+07	33584.9	-27646.1	-5938.78
-2447.61	-2456.63	1948.49	2.38259e+07	2.40323e+07	2.32556e+07	2.65093e+07	2.59251e+07	2.83659e+07	33926.4	-27121.6	-6804.86
-2456.63	-2464.2	1899.93	2.37672e+07	2.41238e+07	2.32086e+07	2.65188e+07	2.60166e+07	2.8562e+07	34171.6	-26417.3	-7754.29
-2464.2	-2470.22	1849.95	2.37088e+07	2.42124e+07	2.31564e+07	2.6525e+07	2.61121e+07	2.8755e+07	34423	-25770.9	-8652.1
-2470.22	-2474.7	1798.6	2.3651e+07	2.42995e+07	2.30997e+07	2.65287e+07	2.62116e+07	2.89439e+07	34625.8	-25055.1	-9570.68
-2474.7	-2477.57	1745.87	2.35935e+07	2.43843e+07	2.30381e+07	2.65297e+07	2.6315e+07	2.91291e+07	34809.5	-24338.3	-10471.2
-2477.57	-2478.82	1691.8	2.35365e+07	2.44671e+07	2.29718e+07	2.65284e+07	2.64223e+07	2.93102e+07	34957.9	-23584.2	-11373.7
-2478.82	-2478.38	1636.39	2.348e+07	2.45475e+07	2.29007e+07	2.65248e+07	2.65332e+07	2.94874e+07	35079.3	-22812	-12267.3
-2478.38	-2476.24	1579.67	2.34241e+07	2.46256e+07	2.28248e+07	2.65193e+07	2.66477e+07	2.96603e+07	35168.7	-22012.3	-13156.4
-2476.24	-2472.34	1521.67	2.33686e+07	2.47011e+07	2.27442e+07	2.65119e+07	2.67657e+07	2.98291e+07	35228.2	-21189.8	-14038.4
-2472.34	-2477.73	1468.07	2.33138e+07	2.4774e+07	2.26587e+07	2.65028e+07	2.68872e+07	2.99936e+07	34750.2	-19308.6	-15441.6
-2477.73	-2491.96	1418.68	2.32612e+07	2.48519e+07	2.25706e+07	2.64954e+07	2.7009e+07	3.01492e+07	34511.2	-17958.5	-16552.6
-2491.96	-2503.99	1367.89	2.32091e+07	2.49294e+07	2.24794e+07	2.64882e+07	2.713e+07	3.0297e+07	34600.5	-17321.7	-17278.8
-2503.99	-2514.03	1315.86	2.31556e+07	2.50005e+07	2.23839e+07	2.64789e+07	2.72512e+07	3.044e+07	34461.1	-16259.3	-18201.8
-2514.03	-2521.91	1262.56	2.31018e+07	2.50683e+07	2.22847e+07	2.64686e+07	2.73718e+07	3.05769e+07	34393	-15388	-19005
-2521.91	-2527.66	1208.05	2.30472e+07	2.51312e+07	2.21817e+07	2.6457e+07	2.74919e+07	3.07084e+07	34234.2	-14375.5	-19858.7
-2527.66	-2531.21	1152.33	2.29922e+07	2.519e+07	2.20753e+07	2.64442e+07	2.76113e+07	3.08342e+07	34072	-13403.6	-20668.5
-2531.21	-2532.54	1095.46	2.29368e+07	2.52445e+07	2.19652e+07	2.64303e+07	2.77299e+07	3.09546e+07	33859.4	-12375.2	-21484.2
-2532.54	-2531.62	1037.46	2.28811e+07	2.52949e+07	2.18519e+07	2.64152e+07	2.78474e+07	3.10696e+07	33621.8	-11345.2	-22276.6
-2531.62	-2528.42	978.372	2.28253e+07	2.53412e+07	2.17353e+07	2.6399e+07	2.79638e+07	3.11793e+07	33345.7	-10285.6	-23060.1
-2528.42	-2481.37	897.014	2.27695e+07	2.53834e+07	2.16157e+07	2.63817e+07	2.80789e+07	3.12837e+07	34935.5	-13091.5	-21844
-2481.37	-2392.02	794.277	2.27156e+07	2.54441e+07	2.14999e+07	2.63649e+07	2.81757e+07	3.13578e+07	35478.5	-13798.9	-21679.7
-2392.02	-2301.62	691.317	2.26613e+07	2.55101e+07	2.13893e+07	2.63468e+07	2.82543e+07	3.14083e+07	34640.2	-11735.8	-22904.3
-2301.62	-2209.19	587.7	2.26051e+07	2.55658e+07	2.12823e+07	2.63263e+07	2.83234e+07	3.14511e+07	34508.2	-11166.7	-23341.5
-2209.19	-2115.37	483.89	2.25482e+07	2.56202e+07	2.11808e+07	2.6304e+07	2.83775e+07	3.1478e+07	33961.2	-9788.31	-24172.9
-2115.37	-2020.01	378.073	2.24689e+07	2.56689e+07	2.10854e+07	2.62686e+07	2.84194e+07	3.1469e+07	35390	-8838.11	-26551.9
-2020.01	-1923.75	271.736	2.24148e+07	2.5715e+07	2.09944e+07	2.62448e+07	2.84475e+07	3.14803e+07	34844.9	-7619.56	-27225.3
-1923.75	-1827.78	168.775	2.23551e+07	2.57574e+07	2.09095e+07	2.62167e+07	2.84629e+07	3.1476e+07	34592.4	-6437.06	-28155.3
-1827.78	-1734.89	74.3334	2.22999e+07	2.57967e+07	2.08307e+07	2.6189e+07	2.84661e+07	3.14697e+07	34420.4	-4985.87	-29434.6
-1734.89	-1649.51	-1.13245	2.22461e+07	2.58315e+07	2.07572e+07	2.61598e+07	2.84597e+07	3.1462e+07	32711.7	-3267.5	-29444.2
-1649.51	-1596.53	-61.8888	2.21829e+07	2.58604e+07	2.06859e+07	2.6125e+07	2.84477e+07	3.1447e+07	30023	629.471	-30652.4
-1596.53	-1569.56	-119.766	2.21194e+07	2.58645e+07	2.06192e+07	2.60891e+07	2.84561e+07	3.14565e+07	28255.9	2840.2	-31096.1
-1569.56	-1540.86	-176.645	2.2039e+07	2.58585e+07	2.05525e+07	2.60498e+07	2.84779e+07	3.1447e+07	28376.6	3330.3	-31707
-1540.86	-1510.72	-233.143	2.19801e+07	2.58569e+07	2.04892e+07	2.60186e+07	2.84978e+07	3.14434e+07	27410.6	4720.29	-32130.9
-1510.72	-1478.65	-289.521	2.19213e+07	2.58518e+07	2.04269e+07	2.59905e+07	2.85242e+07	3.14326e+07	26969.9	5607.8	-32577.7
-1478.65	-1444.73	-345.933	2.18734e+07	2.5847e+07	2.03672e+07	2.59682e+07	2.85525e+07	3.14216e+07	26195.2	6755.66	-32950.9
-1444.73	-1408.83	-402.425	2.18298e+07	2.58401e+07	2.03091e+07	2.59509e+07	2.85852e+07	3.14069e+07	25553.1	7754.02	-33307.1
-1408.83	-1370.99	-459.007	2.17935e+07	2.58318e+07	2.02532e+07	2.59393e+07	2.86209e+07	3.13908e+07	24795.8	8825.13	-33620.9
-1370.99	-1331.18	-515.653	2.17623e+07	2.58213e+07	2.01993e+07	2.59336e+07	2.86603e+07	3.13725e+07	24058.6	9847.89	-33906.5
-1331.18	-1289.43	-572.322	2.17366e+07	2.58086e+07	2.01476e+07	2.5934e+07	2.87029e+07	3.13526e+07	23270.6	10887.1	-34157.7
-1289.43	-1241.79	-625.301	2.17156e+07	2.57934e+07	2.00979e+07	2.59409e+07	2.8749e+07	3.13312e+07	23182.8	11536	-34718.8
-1241.79	-1188.44	-674.667	2.17162e+07	2.57818e+07	2.00529e+07	2.5951e+07	2.87857e+07	3.13188e+07	22683.5	12380.7	-35064.2
-1188.44	-1133.35	-724.019	2.17253e+07	2.5771e+07	2.00087e+07	2.59603e+07	2.88164e+07	3.13103e+07	21656.6	13474	-35130.6
-1133.35	-1076.45	-773.22	2.17284e+07	2.57572e+07	1.99621e+07	2.59691e+07	2.88488e+07	3.12988e+07	20882.7	14414.6	-35297.3
-1076.45	-1017.85	-822.248	2.17333e+07	2.57424e+07	1.9915e+07	2.5977e+07	2.88789e+07	3.12878e+07	19943.7	15416.2	-35359.9
-1017.85	-957.548	-871.016	2.17358e+07	2.57256e+07	1.98665e+07	2.59843e+07	2.89088e+07	3.12755e+07	19065.5	16362.6	-35428.1
-957.548	-895.619	-919.471	2.17384e+07	2.57073e+07	1.98174e+07	2.59907e+07	2.89374e+07	3.12628e+07	18128.1	17313.8	-35441.9
-895.619	-832.101	-967.543	2.17399e+07	2.56874e+07	1.97673e+07	2.59962e+07	2.89653e+07	3.12493e+07	17197.3	18236.5	-35433.8
-832.101	-767.053	-1015.17	2.1741e+07	2.5666e+07	1.97166e+07	2.60008e+07	2.89922e+07	3.12352e+07	16239.1	19146.2	-35385.3
-767.053	-700.528	-1062.27	2.17416e+07	2.56432e+07	1.96654e+07	2.60045e+07	2.90182e+07	3.12204e+07	15273	20033.8	-35306.8
-700.528	-632.994	-1109.17	2.1742e+07	2.56191e+07	1.96139e+07	2.60071e+07	2.90432e+07	3.1205e+07	14217.2	20939.7	-35156.9
-632.994	-564.504	-1155.77	2.174e+07	2.55932e+07	1.95615e+07	2.601e+07	2.90688e+07	3.11879e+07	13189.3	21804.3	-34993.6
-564.504	-494.742	-1201.62	2.17373e+07	2.55659e+07	1.9509e+07	2.60131e+07	2.90942e+07	3.11697e+07	12199.7	22621	-34820.7
-494.742	-423.826	-1246.65	2.17355e+07	2.55374e+07	1.94572e+07	2.60158e+07	2.91183e+07	3.11512e+07	11170	23432.6	-34602.7
-423.826	-351.91	-1290.73	2.1734e+07	2.55078e+07	1.94058e+07	2.60183e+07	2.91408e+07	3.11318e+07	10141.5	24218.8	-34360.3
-351.91	-279.255	-1333.71	2.17335e+07	2.54775e+07	1.9355e+07	2.60201e+07	2.91606e+07	3.11116e+07	9088.86	24999.2	-34088.1
-279.255	-206.32	-1375.31	2.17341e+07	2.5447e+07	1.93047e+07	2.60205e+07	2.9176e+07	3.10903e+07	8017.7	25780.4	-33798.1
-206.32	-130.959	-1418.04	2.17365e+07	2.5417e+07	1.92549e+07	2.60188e+07	2.91852e+07	3.10678e+07	6911.92	29100.6	-36012.5
-130.959	-56.6881	-1459.25	2.17398e+07	2.53887e+07	1.92271e+07	2.60149e+07	2.92156e+07	3.10601e+07	5733.51	28993.3	-34726.8
-56.6881	11.8469	-1495.72	2.17431e+07	2.53626e+07	1.91949e+07	2.60092e+07	2.92329e+07	3.10468e+07	4447.87	30618.2	-35066.1
11.8469	74.6272	-1527.8	2.17454e+07	2.5339e+07	1.91715e+07	2.60028e+07	2.92569e+07	3.10377e+07	3174.52	31512.7	-34687.2
74.6272	132.839	-1554.39	2.17469e+07	2.53149e+07	1.91359e+07	2.59964e+07	2.9263e+07	3.10192e+07	2099.82	32480.1	-34579.9
132.839	188.748	-1576.79	2.17419e+07	2.52926e+07	1.90983e+07	2.59967e+07	2.92692e+07	3.09985e+07	1007.89	33293.7	-34301.6
188.748	243.932	-1597.23	2.1734e+07	2.52755e+07	1.9073e+07	2.60031e+07	2.92827e+07	3.09841e+07	-138.15	33862.6	-33724.4
243.932	299.074	-1616.04	2.1728e+07	2.52613e+07	1.90536e+07	2.60117e+07	2.92893e+07	3.09731e+07	-1227.92	34571	-33343.1
299.074	354.436	-1633.33	2.17214e+07	2.52518e+07	1.90438e+07	2.60245e+07	2.92975e+07	3.09679e+07	-2332.19	35026.8	-32694.6
354.436	409.525	-1648.54	2.17152e+07	2.52458e+07	1.904e+07	2.60404e+07	2.93017e+07	3.0967e+07	-3420	35076.8	-31656.8
409.525	462.041	-1659.36	2.17085e+07	2.52426e+07	1.9039e+07	2.60598e+07	2.93003e+07	3.09699e+07	-4513.8	33458.8	-28945
462.041	514.292	-1668.06	2.17013e+07	2.52358e+07	1.90241e+07	2.60826e+07	2.92763e+07	3.09711e+07	-5594.27	35044	-29449.7
514.292	567.447	-1675.77	2.16932e+07	2.5236e+07	1.90254e+07	2.61086e+07	2.92633e+07	3.09819e+07	-6671.39	34845.3	-28173.9
567.447	620.804	-1681.83	2.16842e+07	2.5237e+07	1.90258e+07	2.61379e+07	2.92435e+07	3.0997e+07	-7744.12	35556.2	-27812.1
620.804	670.306	-1678.33	2.16738e+07	2.52426e+07	1.90339e+07	2.61703e+07	2.92267e+07	3.10194e+07	-8446.94	36127.8	-27680.8
670.306	715.862	-1665.35	2.16702e+07	2.52551e+07	1.90704e+07	2.61923e+07	2.92244e+07	3.10504e+07	-9337.72	36720	-27382.3
715.862	761.82	-1651.15	2.16698e+07	2.52697e+07	1.91188e+07	2.62065e+07	2.92316e+07	3.10814e+07	-10478.2	36839.2	-26361
761.82	807.938	-1635.45	2.16673e+07	2.52802e+07	1.91557e+07	2.62209e+07	2.92356e+07	3.11078e+07	-11468.4	37158.6	-25690.2
807.938	854.227	-1618.34	2.16653e+07	2.529e+07	1.91936e+07	2.62316e+07	2.92426e+07	3.11312e+07	-12520.4	37314.3	-24793.9
854.227	900.555	-1599.73	2.16628e+07	2.52972e+07	1.92261e+07	2.62407e+07	2.92491e+07	3.11507e+07	-13519.1	37500.8	-23981.6
900.555	946.862	-1579.62	2.16604e+07	2.53029e+07	1.92571e+07	2.62472e+07	2.92568e+07	3.11665e+07	-14524.6	37613.3	-23088.7
946.862	993.039	-1557.97	2.1658e+07	2.53066e+07	1.92847e+07	2.62518e+07	2.92646e+07	3.11783e+07	-15503.9	37706.9	-22203
993.039	1038.99	-1534.77	2.16558e+07	2.53088e+07	1.93103e+07	2.62543e+07	2.92728e+07	3.1186e+07	-16474.3	37753	-21278.7
1038.99	1084.59	-1510.02	2.16539e+07	2.53091e+07	1.93336e+07	2.62548e+07	2.92811e+07	3.11895e+07	-17428.4	37766.9	-20338.5
1084.59	1149.67	-1520.68	2.16524e+07	2.53079e+07	1.93552e+07	2.62536e+07	2.92894e+07	3.11887e+07	-19954	35879.2	-15925.1
1149.67	1233.44	-1565.2	2.16446e+07	2.52941e+07	1.93397e+07	2.62688e+07	2.92815e+07	3.11936e+07	-21587.9	34943.9	-13356
1233.44	1316.12	-1606.6	2.16321e+07	2.52788e+07	1.93111e+07	2.62947e+07	2.92669e+07	3.12104e+07	-22047.9	35284.8	-13236.9
1316.12	1398.16	-1645.66	2.16184e+07	2.52726e+07	1.92964e+07	2.63194e+07	2.92572e+07	3.12358e+07	-23099.9	34856.9	-11757
1398.16	1479.28	-1681.8	2.16018e+07	2.52695e+07	1.92804e+07	2.63476e+07	2.92465e+07	3.12719e+07	-23789.8	34764.3	-10974.5
1479.28	1559.7	-1715.08	2.15837e+07	2.52725e+07	1.92708e+07	2.63745e+07	2.92379e+07	3.1317e+07	-24615.2	34403.1	-9787.84
1559.7	1639.49	-1745.11	2.15644e+07	2.52792e+07	1.92632e+07	2.63991e+07	2.92295e+07	3.13712e+07	-25287.2	34091.1	-8803.86
1639.49	1719.09	-1771.5	2.1545e+07	2.52909e+07	1.92595e+07	2.64189e+07	2.92229e+07	3.1433e+07	-25918.7	33635.4	-7716.65
1719.09	1799.33	-1793.3	2.15258e+07	2.53079e+07	1.9257e+07	2.64343e+07	2.92184e+07	3.15025e+07	-26362.5	33098.4	-6735.88
1799.33	1880.7	-1810.03	2.15078e+07	2.53304e+07	1.92561e+07	2.64439e+07	2.92169e+07	3.15784e+07	-26760.4	32479.7	-5719.31
1880.7	1954.03	-1817.15	2.14918e+07	2.53587e+07	1.92556e+07	2.64472e+07	2.92192e+07	3.16604e+07	-27561.3	32681.1	-5119.82
1954.03	2018.35	-1816.01	2.14784e+07	2.53947e+07	1.92558e+07	2.64453e+07	2.9227e+07	3.17473e+07	-28322.9	32489.6	-4166.71
2018.35	2084.46	-1812.44	2.14679e+07	2.54379e+07	1.92545e+07	2.64397e+07	2.92409e+07	3.18391e+07	-31555.9	34393.9	-2838.06
2084.46	2150.07	-1806.34	2.14624e+07	2.55134e+07	1.92505e+07	2.64547e+07	2.92734e+07	3.19362e+07	-30997.2	32695.6	-1698.38
2150.07	2213.36	-1797.75	2.14588e+07	2.55621e+07	1.9244e+07	2.64347e+07	2.92972e+07	3.20382e+07	-32110.2	32564.4	-454.22
2213.36	2275.05	-1786.71	2.14597e+07	2.56267e+07	1.92344e+07	2.64216e+07	2.93327e+07	3.21451e+07	-32454.4	31710.7	743.683
2275.05	2331.64	-1773.16	2.14673e+07	2.57152e+07	1.92215e+07	2.64218e+07	2.93827e+07	3.22567e+07	-30509.4	28553.7	1955.62
2331.64	2385.02	-1757.16	2.14752e+07	2.57803e+07	1.92052e+07	2.63943e+07	2.94309e+07	3.23728e+07	-32042.2	28879.8	3162.38
2385.02	2436.75	-1738.83	2.14892e+07	2.58628e+07	1.91851e+07	2.6376e+07	2.94919e+07	3.24933e+07	-31935.3	27563.1	4372.22
2436.75	2486.2	-1718.17	2.15063e+07	2.59422e+07	1.9161e+07	2.635e+07	2.95598e+07	3.2618e+07	-32653.8	27085.5	5568.31
2486.2	2535.51	-1696.19	2.15283e+07	2.60289e+07	1.91328e+07	2.63257e+07	2.96381e+07	3.27468e+07	-32785.3	25936	6849.27
2535.51	2584.4	-1672.9	2.1555e+07	2.61317e+07	1.91074e+07	2.63061e+07	2.97272e+07	3.28722e+07	-33173.9	25105.8	8068.14
2584.4	2631.05	-1647.39	2.15847e+07	2.62423e+07	1.90813e+07	2.62908e+07	2.98234e+07	3.29951e+07	-33451.3	24239.8	9211.48
2631.05	2675.43	-1619.73	2.16153e+07	2.63457e+07	1.90496e+07	2.62734e+07	2.99243e+07	3.31195e+07	-33728.8	23354.2	10374.6
2675.43	2717.5	-1589.97	2.16479e+07	2.64494e+07	1.90149e+07	2.62573e+07	3.0031e+07	3.3243e+07	-33946.6	22444.2	11502.4
2717.5	2757.24	-1558.15	2.16819e+07	2.65489e+07	1.89759e+07	2.62409e+07	3.01428e+07	3.33667e+07	-34136.8	21513.4	12623.3
2757.24	2794.6	-1524.34	2.17172e+07	2.66465e+07	1.89334e+07	2.62252e+07	3.02602e+07	3.34896e+07	-34282.3	20563.8	13718.5
2794.6	2829.59	-1488.6	2.17539e+07	2.67405e+07	1.88871e+07	2.62097e+07	3.0383e+07	3.3612e+07	-34392.5	19595.3	14797.1
2829.59	2862.17	-1450.98	2.17918e+07	2.68316e+07	1.88371e+07	2.6195e+07	3.05112e+07	3.37335e+07	-34463	18611.8	15851.2
2862.17	2892.33	-1411.56	2.18308e+07	2.69192e+07	1.87835e+07	2.61809e+07	3.06447e+07	3.38541e+07	-34496.6	17612.2	16884.4
2892.33	2920.06	-1370.4	2.18709e+07	2.70033e+07	1.87264e+07	2.61677e+07	3.07836e+07	3.39734e+07	-34492.7	16600.7	17892
2920.06	2919.87	-1314.54	2.19118e+07	2.70837e+07	1.86657e+07	2.61554e+07	3.09277e+07	3.40913e+07	-35615.7	17954.5	17661.2
2919.87	2892.69	-1244.58	2.19554e+07	2.71715e+07	1.86051e+07	2.61481e+07	3.10735e+07	3.42018e+07	-36081.9	18024.2	18057.7
2892.69	2863.86	-1173.51	2.19994e+07	2.72589e+07	1.85434e+07	2.61436e+07	3.12196e+07	3.43064e+07	-35684.7	16391.7	19293
2863.86	2832.76	-1101.09	2.20414e+07	2.73374e+07	1.84785e+07	2.61393e+07	3.13675e+07	3.44088e+07	-35705.8	15679.2	20026.6
2832.76	2799.75	-1027.57	2.20827e+07	2.7412e+07	1.84117e+07	2.61365e+07	3.15159e+07	3.45065e+07	-35455.3	14471	20984.2
2799.75	2764.67	-952.943	2.21225e+07	2.74804e+07	1.83425e+07	2.61346e+07	3.16651e+07	3.46007e+07	-35306.3	13534.4	21771.9
2764.67	2727.63	-877.325	2.21611e+07	2.75441e+07	1.82717e+07	2.6134e+07	3.18145e+07	3.46903e+07	-35058.6	12454.9	22603.8
2727.63	2688.62	-800.77	2.21983e+07	2.76027e+07	1.81991e+07	2.61343e+07	3.1964e+07	3.47752e+07	-34821.5	11458.6	23362.9
2688.62	2647.68	-723.369	2.22342e+07	2.76571e+07	1.81256e+07	2.61355e+07	3.21129e+07	3.48543e+07	-34537.1	10423	24114.1
2647.68	2604.84	-645.197	2.22684e+07	2.77078e+07	1.80519e+07	2.61375e+07	3.22605e+07	3.49261e+07	-34237.9	9416.06	24821.8
2604.84	2565.05	-568.848	2.2301e+07	2.77557e+07	1.79792e+07	2.614e+07	3.24054e+07	3.49883e+07	-33682.5	7941.16	25741.4
2565.05	2528.15	-494.315	2.23264e+07	2.77899e+07	1.79081e+07	2.61384e+07	3.25543e+07	3.50406e+07	-33226.4	6725.05	26501.3
2528.15	2489.32	-419.22	2.23509e+07	2.78166e+07	1.78393e+07	2.61371e+07	3.27058e+07	3.50826e+07	-32905.8	5834.06	27071.7
2489.32	2448.77	-343.797	2.23805e+07	2.78436e+07	1.77732e+07	2.61405e+07	3.28554e+07	3.51147e+07	-32478.7	4769.43	27709.3
2448.77	2406.54	-268.288	2.2413e+07	2.78657e+07	1.771e+07	2.61475e+07	3.30054e+07	3.51384e+07	-32081.3	3793.81	28287.5
2406.54	2362.95	-193.211	2.245e+07	2.78849e+07	1.76499e+07	2.61596e+07	3.31541e+07	3.51544e+07	-31650.9	2755.76	28895.2
2362.95	2318.45	-119.473	2.24861e+07	2.78995e+07	1.75939e+07	2.61745e+07	3.33025e+07	3.5158e+07	-31241.1	1714.28	29526.8
2318.45	2273.94	-46.7183	2.25076e+07	2.791e+07	1.75431e+07	2.61871e+07	3.34503e+07	3.51339e+07	-32707.3	599.917	32107.4
2273.94	2230.89	21.8167	2.25576e+07	2.79152e+07	1.74913e+07	2.62162e+07	3.35983e+07	3.51376e+07	-32353.1	-608.715	32961.8
2230.89	2189.51	82.0345	2.26069e+07	2.79143e+07	1.7442e+07	2.62497e+07	3.37478e+07	3.5135e+07	-30189.1	-1781.25	31970.4
2189.51	2148.44	137.041	2.26454e+07	2.79076e+07	1.73943e+07	2.62844e+07	3.38992e+07	3.51158e+07	-29762.5	-2840.77	32603.2
2148.44	2106.72	190.309	2.27122e+07	2.78998e+07	1.73465e+07	2.63326e+07	3.40477e+07	3.51241e+07	-29215	-3860.87	33075.9
2106.72	2063.85	242.662	2.2777e+07	2.78892e+07	1.72986e+07	2.63839e+07	3.41941e+07	3.51272e+07	-28665.5	-4850.13	33515.6
2063.85	2019.6	294.571	2.28421e+07	2.78733e+07	1.72508e+07	2.64391e+07	3.43407e+07	3.51311e+07	-28064.6	-5824.76	33889.3
2019.6	1973.82	346.282	2.29058e+07	2.78535e+07	1.72029e+07	2.64977e+07	3.44858e+07	3.51324e+07	-27448.1	-6787.57	34235.7
1973.82	1926.45	397.924	2.29689e+07	2.78293e+07	1.71549e+07	2.65597e+07	3.46303e+07	3.51329e+07	-26802.7	-7741.11	34543.8
1926.45	1877.44	449.556	2.30308e+07	2.78009e+07	1.71067e+07	2.6625e+07	3.47735e+07	3.51318e+07	-26138.4	-8688.24	34826.6
1877.44	1826.8	501.194	2.30917e+07	2.77681e+07	1.70587e+07	2.66936e+07	3.49156e+07	3.51298e+07	-25451.8	-9627.36	35079.2
1826.8	1774.51	552.826	2.31515e+07	2.77312e+07	1.70107e+07	2.67655e+07	3.50563e+07	3.51266e+07	-24745.8	-10561.1	35306.8
1774.51	1720.6	604.425	2.32102e+07	2.76899e+07	1.69629e+07	2.68406e+07	3.51957e+07	3.51227e+07	-24019.6	-11486.3	35505.9
1720.6	1664.6	655.496	2.32678e+07	2.76444e+07	1.69155e+07	2.69188e+07	3.53336e+07	3.5118e+07	-23362.4	-12359.5	35721.9
1664.6	1606.53	706.009	2.33268e+07	2.75957e+07	1.68688e+07	2.69995e+07	3.5468e+07	3.51144e+07	-22638.3	-13247.6	35885.9
1606.53	1546.92	756.373	2.33855e+07	2.75435e+07	1.68224e+07	2.7082e+07	3.55993e+07	3.51111e+07	-21831.1	-14160.9	35992.1
1546.92	1485.8	806.522	2.34415e+07	2.7487e+07	1.67762e+07	2.71663e+07	3.57288e+07	3.51071e+07	-21039.3	-15045.1	36084.4
1485.8	1423.19	856.408	2.34961e+07	2.74267e+07	1.67305e+07	2.72523e+07	3.58557e+07	3.51031e+07	-20209.8	-15929.3	36139.1
1423.19	1359.13	905.966	2.35486e+07	2.73624e+07	1.66854e+07	2.73398e+07	3.59804e+07	3.50988e+07	-19371.6	-16794.9	36166.5
1359.13	1293.67	955.141	2.35993e+07	2.72943e+07	1.66411e+07	2.74287e+07	3.61025e+07	3.50945e+07	-18508.9	-17651.8	36160.7
1293.67	1226.83	1003.87	2.36481e+07	2.72226e+07	1.65977e+07	2.75188e+07	3.62221e+07	3.50901e+07	-17630.9	-18491.6	36122.4
1226.83	1158.67	1052.08	2.3695e+07	2.71473e+07	1.65555e+07	2.76102e+07	3.63391e+07	3.50856e+07	-16732.6	-19318.5	36051.1
1158.67	1089.23	1099.72	2.374e+07	2.70685e+07	1.65146e+07	2.77025e+07	3.64533e+07	3.5081e+07	-15817.5	-20127.2	35944.7
1089.23	1012.19	1140.81	2.37832e+07	2.69867e+07	1.64751e+07	2.77956e+07	3.65643e+07	3.50764e+07	-16028	-20326.9	36354.9
1012.19	927.837	1175.52	2.38509e+07	2.69086e+07	1.64437e+07	2.78744e+07	3.66518e+07	3.50848e+07	-15609.7	-20823.2	36432.9
927.837	842.526	1209.67	2.39261e+07	2.68329e+07	1.64136e+07	2.79372e+07	3.67236e+07	3.50983e+07	-14356.5	-21723.7	36080.2
842.526	756.173	1243.07	2.39888e+07	2.67562e+07	1.63781e+07	2.79913e+07	3.67931e+07	3.51069e+07	-13532.9	-22371.6	35904.5
756.173	668.925	1275.72	2.405e+07	2.66807e+07	1.63414e+07	2.80325e+07	3.68541e+07	3.51152e+07	-12459.9	-23121.1	35581
668.925	580.829	1307.5	2.41047e+07	2.66055e+07	1.63016e+07	2.80631e+07	3.69109e+07	3.51205e+07	-11502.7	-23779.9	35282.6
580.829	489.575	1340.74	2.41563e+07	2.65312e+07	1.62602e+07	2.80819e+07	3.69626e+07	3.51238e+07	-10468.9	-26467.9	36936.9
489.575	396.275	1374.38	2.42038e+07	2.64554e+07	1.6232e+07	2.80897e+07	3.70352e+07	3.51396e+07	-9453.43	-26699.9	36153.3
396.275	303.13	1406.46	2.4249e+07	2.63823e+07	1.61998e+07	2.80861e+07	3.70977e+07	3.5149e+07	-8392.16	-27565.4	35957.6
303.13	211.621	1435.94	2.42917e+07	2.63115e+07	1.61684e+07	2.80714e+07	3.71585e+07	3.5156e+07	-7300.01	-27515.7	34815.7
211.621	125.715	1459.87	2.43326e+07	2.62433e+07	1.61304e+07	2.80458e+07	3.72067e+07	3.51538e+07	-6118.66	-26769.6	32888.2
125.715	50.1098	1489.76	2.43713e+07	2.61759e+07	1.60581e+07	2.80103e+07	3.72038e+07	3.51204e+07	-3456.44	-28978.1	32434.5
50.1098	-15.9094	1525.9	2.43949e+07	2.61082e+07	1.59903e+07	2.79795e+07	3.72296e+07	3.50874e+07	-1563.31	-29582.8	31146.1
-15.9094	-77.6609	1557.82	2.44114e+07	2.60388e+07	1.59111e+07	2.7952e+07	3.72462e+07	3.50421e+07	-727.741	-30460.2	31187.9
-77.6609	-136.904	1586.82	2.44307e+07	2.59681e+07	1.58413e+07	2.79204e+07	3.72695e+07	3.49998e+07	615.159	-30992.8	30377.7
-136.904	-194.932	1613.3	2.44482e+07	2.58949e+07	1.57697e+07	2.78891e+07	3.7291e+07	3.49523e+07	1633.97	-31533.7	29899.8
-194.932	-252.474	1637.72	2.44666e+07	2.58199e+07	1.57031e+07	2.78557e+07	3.73156e+07	3.49039e+07	2804.62	-31957.7	29153.1
-252.474	-309.858	1660.18	2.44846e+07	2.57479e+07	1.5657e+07	2.78217e+07	3.73655e+07	3.48626e+07	3885.12	-32362.7	28477.6
-309.858	-367.267	1680.78	2.45029e+07	2.56717e+07	1.56025e+07	2.77864e+07	3.73996e+07	3.4812e+07	5011.39	-32713.5	27702.1
-367.267	-424.765	1699.51	2.45211e+07	2.55958e+07	1.55547e+07	2.77505e+07	3.74391e+07	3.47601e+07	6112.49	-33036.5	26924
-424.765	-482.369	1716.37	2.45393e+07	2.55174e+07	1.55051e+07	2.77138e+07	3.74723e+07	3.47027e+07	7226.64	-33323.5	26096.8
-482.369	-547.896	1746.22	2.45572e+07	2.54381e+07	1.54585e+07	2.76767e+07	3.75054e+07	3.46417e+07	8987.9	-32848.3	23860.4
-547.896	-621.018	1788.47	2.45739e+07	2.53567e+07	1.54088e+07	2.7641e+07	3.75325e+07	3.45753e+07	10397.5	-32734.2	22336.8
-621.018	-693.897	1828.25	2.45897e+07	2.52744e+07	1.536e+07	2.76066e+07	3.75564e+07	3.45054e+07	11329.2	-33108.5	21779.3
-693.897	-766.658	1865.87	2.46053e+07	2.51917e+07	1.53138e+07	2.75723e+07	3.75781e+07	3.44328e+07	12512.5	-33168.9	20656.4
-766.658	-839.119	1901.12	2.46204e+07	2.51083e+07	1.5269e+07	2.75389e+07	3.75968e+07	3.4357e+07	13553.3	-33347.4	19794.1
-839.119	-911.266	1934.05	2.4635e+07	2.50244e+07	1.52261e+07	2.75063e+07	3.7613e+07	3.42783e+07	14659.6	-33411.2	18751.6
-911.266	-982.998	1964.59	2.46491e+07	2.494e+07	1.51846e+07	2.74748e+07	3.76263e+07	3.41967e+07	15716.7	-33484.6	17767.9
-982.998	-1054.26	1992.74	2.46627e+07	2.48553e+07	1.51446e+07	2.74443e+07	3.76369e+07	3.41125e+07	16783	-33501.6	16718.5
-1054.26	-1124.97	2018.46	2.46758e+07	2.47703e+07	1.5106e+07	2.7415e+07	3.76446e+07	3.40255e+07	17824	-33496.2	15672.2
-1124.97	-1195.07	2041.74	2.46886e+07	2.46851e+07	1.50687e+07	2.73869e+07	3.76496e+07	3.3936e+07	18855.1	-33451.5	14596.4
-1195.07	-1260.85	2055.71	2.4701e+07	2.45997e+07	1.50327e+07	2.73602e+07	3.76517e+07	3.3844e+07	19563.3	-33714.7	14151.4
-1260.85	-1322.39	2060.62	2.47123e+07	2.45128e+07	1.49934e+07	2.73375e+07	3.76483e+07	3.37503e+07	20415.4	-33761	13345.6
-1322.39	-1383.23	2063.32	2.47227e+07	2.44258e+07	1.49535e+07	2.73181e+07	3.76408e+07	3.36562e+07	21461.2	-33532.1	12070.9
-1383.23	-1443.22	2063.66	2.47328e+07	2.43401e+07	1.49168e+07	2.73004e+07	3.76312e+07	3.3562e+07	22366.5	-33403	11036.5
-1443.22	-1502.33	2061.72	2.47423e+07	2.42551e+07	1.48812e+07	2.72851e+07	3.76187e+07	3.34679e+07	23307.7	-33169.7	9862.05
-1502.33	-1560.5	2057.48	2.47516e+07	2.41711e+07	1.48478e+07	2.72718e+07	3.76037e+07	3.33739e+07	24188	-32944.4	8756.41
-1560.5	-1617.65	2050.98	2.47606e+07	2.40881e+07	1.48158e+07	2.72606e+07	3.75861e+07	3.32804e+07	25056.9	-32665.4	7608.42
-1617.65	-1673.72	2042.23	2.47695e+07	2.40061e+07	1.47856e+07	2.72514e+07	3.7566e+07	3.31873e+07	25886.5	-32368	6481.47
-1673.72	-1728.65	2031.27	2.47783e+07	2.39251e+07	1.4757e+07	2.72442e+07	3.75435e+07	3.30948e+07	26690.5	-32032.7	5342.15
-1728.65	-1782.34	2018.14	2.47872e+07	2.38452e+07	1.47299e+07	2.72388e+07	3.75185e+07	3.30032e+07	27461.6	-31672.8	4211.12
-1782.34	-1835.36	2003.97	2.47962e+07	2.37662e+07	1.47044e+07	2.72352e+07	3.74912e+07	3.29124e+07	28244.4	-31221.4	2976.92
-1835.36	-1887.6	1988.76	2.48048e+07	2.36814e+07	1.46668e+07	2.72404e+07	3.74557e+07	3.28292e+07	28972	-30775.5	1803.59
-1887.6	-1938.31	1971.54	2.48123e+07	2.35958e+07	1.46254e+07	2.72506e+07	3.7416e+07	3.27548e+07	29643.6	-30345	701.389
-1938.31	-1990.04	1952.57	2.48187e+07	2.35148e+07	1.45907e+07	2.7259e+07	3.73767e+07	3.26859e+07	32575.7	-32128.3	-447.458
-1990.04	-2041.56	1931.82	2.48259e+07	2.3443e+07	1.45581e+07	2.72729e+07	3.73406e+07	3.26234e+07	32574.7	-31016.4	-1558.3
-2041.56	-2091.11	1909.17	2.4832e+07	2.33609e+07	1.45303e+07	2.72694e+07	3.72961e+07	3.25654e+07	33434.5	-30776.5	-2658.01
-2091.11	-2139.2	1884.58	2.48435e+07	2.33036e+07	1.45045e+07	2.72832e+07	3.72645e+07	3.25122e+07	33877.9	-30132.8	-3745.12
-2139.2	-2182.98	1857.98	2.48591e+07	2.32554e+07	1.44805e+07	2.72985e+07	3.72365e+07	3.24637e+07	32222.3	-27412.4	-4809.95
-2182.98	-2223.59	1829.39	2.48725e+07	2.31857e+07	1.44579e+07	2.72892e+07	3.71978e+07	3.24198e+07	33213.8	-27342.8	-5871
-2223.59	-2262.73	1798.93	2.48904e+07	2.31276e+07	1.44365e+07	2.72854e+07	3.71652e+07	3.23805e+07	33347.5	-26425.7	-6921.84
-2262.73	-2302.45	1767.85	2.49106e+07	2.30696e+07	1.44161e+07	2.72776e+07	3.71343e+07	3.23457e+07	33772.5	-25700	-8072.49
-2302.45	-2342.79	1736.15	2.49348e+07	2.30198e+07	1.43975e+07	2.72721e+07	3.71084e+07	3.23146e+07	33979.2	-24829.9	-9149.3
-2342.79	-2381.22	1702.65	2.49618e+07	2.29732e+07	1.43803e+07	2.72659e+07	3.70859e+07	3.22872e+07	34350.6	-24220.1	-10130.5
-2381.22	-2417.83	1667.42	2.4992e+07	2.29295e+07	1.43636e+07	2.72598e+07	3.7067e+07	3.22639e+07	34572.4	-23430.4	-11141.9
-2417.83	-2452.51	1630.49	2.50252e+07	2.28883e+07	1.43479e+07	2.72535e+07	3.7052e+07	3.22443e+07	34813.6	-22698	-12115.6
-2452.51	-2485.25	1591.92	2.50614e+07	2.28495e+07	1.4333e+07	2.72472e+07	3.70412e+07	3.22285e+07	34983.8	-21897.4	-13086.4
-2485.25	-2515.99	1551.75	2.51005e+07	2.28128e+07	1.43188e+07	2.7241e+07	3.70347e+07	3.22163e+07	35131.7	-21096	-14035.7
-2515.99	-2544.72	1510.02	2.51424e+07	2.27779e+07	1.43055e+07	2.7235e+07	3.70329e+07	3.22076e+07	35231.8	-20260.2	-14971.6
-2544.72	-2571.39	1466.79	2.51871e+07	2.27447e+07	1.42929e+07	2.72292e+07	3.70358e+07	3.22023e+07	35298.3	-19408.1	-15890.1
-2571.39	-2595.98	1422.1	2.52343e+07	2.27129e+07	1.4281e+07	2.72239e+07	3.70437e+07	3.22002e+07	35324.4	-18533	-16791.4
-2595.98	-2618.45	1376	2.52841e+07	2.26822e+07	1.42699e+07	2.72191e+07	3.70569e+07	3.22013e+07	35314.1	-17638.5	-17675.6
-2618.45	-2621.37	1319.64	2.5336e+07	2.26527e+07	1.42595e+07	2.7215e+07	3.70754e+07	3.22053e+07	36061.2	-18350.6	-17710.7
-2621.37	-2605.37	1253.43	2.5396e+07	2.26537e+07	1.42588e+07	2.72219e+07	3.70958e+07	3.21996e+07	36347.9	-18173	-18174.9
-2605.37	-2587.72	1186.27	2.54577e+07	2.26659e+07	1.42645e+07	2.72343e+07	3.71125e+07	3.21871e+07	36033.2	-16824.8	-19208.4
-2587.72	-2568	1117.97	2.55148e+07	2.26665e+07	1.42714e+07	2.72449e+07	3.71253e+07	3.21752e+07	35992.2	-16092.7	-19899.5
-2568	-2546.41	1048.73	2.55704e+07	2.26685e+07	1.42824e+07	2.72572e+07	3.71337e+07	3.216e+07	35754.6	-15015.2	-20739.4
-2546.41	-2522.85	978.529	2.56228e+07	2.26655e+07	1.42962e+07	2.72693e+07	3.7138e+07	3.21437e+07	35574.3	-14111.4	-21462.8
-2522.85	-2497.38	907.468	2.56728e+07	2.26617e+07	1.43138e+07	2.72819e+07	3.71377e+07	3.2125e+07	35315.6	-13104.3	-22211.3
-2497.38	-2469.95	835.585	2.57197e+07	2.26557e+07	1.43348e+07	2.72946e+07	3.7133e+07	3.21047e+07	35052.2	-12143.6	-22908.7
-2469.95	-2440.61	762.954	2.5764e+07	2.2649e+07	1.43594e+07	2.73073e+07	3.71236e+07	3.20825e+07	34745.6	-11151.4	-23594.3
-2440.61	-2409.35	689.631	2.58054e+07	2.26417e+07	1.43878e+07	2.732e+07	3.71094e+07	3.20585e+07	34417.1	-10169.6	-24247.5
-2409.35	-2396.31	625.952	2.58439e+07	2.26342e+07	1.44198e+07	2.73326e+07	3.70904e+07	3.20327e+07	33136	-7300.23	-25835.8
-2396.31	-2400.74	571.558	2.58608e+07	2.25633e+07	1.44424e+07	2.73309e+07	3.70964e+07	3.20352e+07	32319.3	-5439.92	-26879.4
-2400.74	-2402.66	516.295	2.58726e+07	2.24666e+07	1.44574e+07	2.73257e+07	3.71299e+07	3.2056e+07	32128.8	-4914.8	-27214
-2402.66	-2402.55	460.349	2.58966e+07	2.23909e+07	1.44705e+07	2.7328e+07	3.71754e+07	3.20757e+07	31658.9	-3658.55	-28000.4
-2402.55	-2400.12	400.745	2.59241e+07	2.23105e+07	1.44781e+07	2.73335e+07	3.72421e+07	3.21047e+07	33780.6	-2793.88	-30986.7
-2400.12	-2395.51	339.678	2.5983e+07	2.22377e+07	1.44768e+07	2.73561e+07	3.73244e+07	3.21593e+07	31952.5	-1709.27	-30243.2
-2395.51	-2388.68	278.552	2.60183e+07	2.21643e+07	1.44765e+07	2.73706e+07	3.74254e+07	3.21903e+07	32090.6	-738.28	-31352.3
-2388.68	-2379.62	216.608	2.60654e+07	2.20933e+07	1.44701e+07	2.73939e+07	3.75427e+07	3.22297e+07	31212.5	292.922	-31505.4
-2379.62	-2368.27	154.156	2.61121e+07	2.2023e+07	1.44593e+07	2.74217e+07	3.76763e+07	3.22657e+07	30780	1286.57	-32066.6
-2368.27	-2354.51	90.7885	2.61623e+07	2.19554e+07	1.4445e+07	2.74562e+07	3.78233e+07	3.22977e+07	30111	2288.34	-32399.4
-2354.51	-2325.41	26.8	2.62295e+07	2.18924e+07	1.4429e+07	2.75027e+07	3.79797e+07	3.23331e+07	27965.2	2073.26	-30038.5
-2325.41	-2283.21	-36.1803	2.6304e+07	2.18681e+07	1.4415e+07	2.75566e+07	3.81136e+07	3.23342e+07	29057	2670.39	-31727.4
-2283.21	-2241.8	-94.9823	2.64042e+07	2.18571e+07	1.44016e+07	2.76199e+07	3.82334e+07	3.23462e+07	27675.6	4132.09	-31807.7
-2241.8	-2199.82	-151.091	2.64859e+07	2.18334e+07	1.43883e+07	2.76816e+07	3.83575e+07	3.23527e+07	27499.1	5016.18	-32515.3
-2199.82	-2156.85	-205.907	2.65718e+07	2.18113e+07	1.43749e+07	2.77463e+07	3.84756e+07	3.23614e+07	26589.3	6136.37	-32725.6
-2156.85	-2112.48	-259.882	2.66492e+07	2.17839e+07	1.43611e+07	2.78116e+07	3.85931e+07	3.23675e+07	26013.1	7083.29	-33096.4
-2112.48	-2066.6	-313.393	2.67248e+07	2.17554e+07	1.43467e+07	2.78782e+07	3.87067e+07	3.23733e+07	25211.6	8088.83	-33300.4
-2066.6	-2019.13	-366.552	2.67949e+07	2.17239e+07	1.43315e+07	2.79455e+07	3.88179e+07	3.23773e+07	24492.1	9036.29	-33528.4
-2019.13	-1970.03	-419.444	2.68617e+07	2.16907e+07	1.43154e+07	2.80136e+07	3.89256e+07	3.23802e+07	23695.2	9990.36	-33685.6
-1970.03	-1919.31	-472.072	2.6924e+07	2.16555e+07	1.42983e+07	2.80823e+07	3.90302e+07	3.23815e+07	22908.9	10919.3	-33828.2
-1919.31	-1857.17	-515.427	2.69826e+07	2.16185e+07	1.42801e+07	2.81514e+07	3.91313e+07	3.23815e+07	23844.2	10923.7	-34767.9
-1857.17	-1784	-549.798	2.70474e+07	2.15847e+07	1.4261e+07	2.82187e+07	3.92225e+07	3.23847e+07	23832	11401.7	-35233.7
-1784	-1709.57	-584.133	2.71113e+07	2.15519e+07	1.42395e+07	2.82822e+07	3.93057e+07	3.23886e+07	22545.1	12517.6	-35062.8
-1709.57	-1633.69	-618.201	2.71667e+07	2.15172e+07	1.42145e+07	2.83424e+07	3.93846e+07	3.23898e+07	21928	13263.3	-35191.2
-1633.69	-1556.54	-652.063	2.72184e+07	2.14825e+07	1.41866e+07	2.83986e+07	3.9457e+07	3.23901e+07	20937.4	14180.2	-35117.6
-1556.54	-1478.08	-685.621	2.72644e+07	2.14469e+07	1.41555e+07	2.84508e+07	3.95241e+07	3.23884e+07	20133.9	14977.9	-35111.8
-1478.08	-1398.4	-718.857	2.73065e+07	2.14112e+07	1.41213e+07	2.84986e+07	3.95854e+07	3.23851e+07	19217.8	15811.3	-35029.1
-1398.4	-1317.53	-751.71	2.73443e+07	2.1375e+07	1.40839e+07	2.85418e+07	3.9641e+07	3.23798e+07	18349.9	16598.4	-34948.3
-1317.53	-1235.52	-784.142	2.73785e+07	2.13387e+07	1.40435e+07	2.85803e+07	3.9691e+07	3.23727e+07	17445.1	17381.8	-34826.9
-1235.52	-1152.42	-816.103	2.74093e+07	2.13022e+07	1.4e+07	2.86139e+07	3.97355e+07	3.23635e+07	16548.8	18140.1	-34688.9
-1152.42	-1083.91	-862.057	2.74373e+07	2.12656e+07	1.39536e+07	2.86423e+07	3.97744e+07	3.23524e+07	12825.3	20342.1	-33167.4
-1083.91	-1029.49	-921.411	2.7437e+07	2.12202e+07	1.38999e+07	2.86807e+07	3.98267e+07	3.2329e+07	10604.2	21746.6	-32350.7
-1029.49	-973.683	-979.609	2.74255e+07	2.11688e+07	1.38448e+07	2.87294e+07	3.98857e+07	3.23001e+07	10385.9	22094.3	-32480.2
-973.683	-916.896	-1036.91	2.74224e+07	2.1116e+07	1.37932e+07	2.87801e+07	3.99391e+07	3.22731e+07	9066.68	22992.5	-32059.1
-916.896	-858.967	-1093.11	2.74167e+07	2.10592e+07	1.37424e+07	2.88377e+07	3.99935e+07	3.22444e+07	8315.8	23573.3	-31889.1
-858.967	-800.039	-1148.24	2.74138e+07	2.09994e+07	1.36938e+07	2.88994e+07	4.00451e+07	3.22163e+07	7236.65	24305.7	-31542.3
-800.039	-740.091	-1202.21	2.74102e+07	2.09361e+07	1.36466e+07	2.89666e+07	4.00957e+07	3.21878e+07	6312.8	24935.1	-31247.9
-740.091	-679.19	-1255.01	2.74075e+07	2.08696e+07	1.36013e+07	2.90382e+07	4.01437e+07	3.21595e+07	5284.92	25599.8	-30884.7
-679.19	-617.358	-1306.57	2.74046e+07	2.08055e+07	1.35406e+07	2.91145e+07	4.01583e+07	3.21148e+07	4294.43	26223.2	-30517.6
-617.358	-554.641	-1356.87	2.74022e+07	2.07354e+07	1.34869e+07	2.91945e+07	4.018e+07	3.20765e+07	3266.05	26847.3	-30113.4
-554.641	-491.073	-1405.86	2.74004e+07	2.06636e+07	1.34299e+07	2.92769e+07	4.01874e+07	3.2035e+07	2242.53	27447.3	-29689.8
-491.073	-421.593	-1448.65	2.73991e+07	2.05893e+07	1.33745e+07	2.9361e+07	4.01883e+07	3.1995e+07	2132.34	27561	-29693.3
-421.593	-346.518	-1485.31	2.74036e+07	2.05147e+07	1.3322e+07	2.94396e+07	4.01746e+07	3.19576e+07	1516.91	27917.7	-29434.6
-346.518	-271.15	-1520.6	2.74097e+07	2.044e+07	1.32712e+07	2.9514e+07	4.01508e+07	3.19222e+07	219.998	28612.6	-28832.6
-271.15	-195.724	-1554.22	2.74121e+07	2.03649e+07	1.32219e+07	2.95885e+07	4.01245e+07	3.18889e+07	-728.595	29124.1	-28395.5
-195.724	-120.978	-1585.87	2.74131e+07	2.029e+07	1.31737e+07	2.96607e+07	4.00918e+07	3.18576e+07	-1895.88	29763.7	-27867.8
-120.978	-48.143	-1614.88	2.74113e+07	2.02151e+07	1.3128e+07	2.97324e+07	4.00577e+07	3.18293e+07	-3002.36	30417.1	-27414.7
-48.143	20.7063	-1640.2	2.74071e+07	2.01406e+07	1.30884e+07	2.98032e+07	4.0028e+07	3.18061e+07	-4234.53	31222.2	-26987.7
20.7063	85.2276	-1661.66	2.73995e+07	2.0069e+07	1.30691e+07	2.98746e+07	4.00258e+07	3.17953e+07	-5413.73	31946.4	-26532.6
85.2276	147.215	-1680.17	2.73889e+07	1.99965e+07	1.30437e+07	2.99465e+07	4.00107e+07	3.17828e+07	-6534.51	32509.4	-25974.9
147.215	208.043	-1696.44	2.73757e+07	1.9925e+07	1.30251e+07	3.00187e+07	4.00024e+07	3.17749e+07	-7614.93	32987.7	-25372.7
208.043	271.935	-1717.92	2.73601e+07	1.98529e+07	1.30056e+07	3.00909e+07	3.99892e+07	3.17681e+07	-9008.98	33075.9	-24066.9
271.935	339.214	-1744.58	2.73375e+07	1.97802e+07	1.29784e+07	3.01707e+07	3.99674e+07	3.17615e+07	-10202.2	33286.6	-23084.5
339.214	406.586	-1769.46	2.73101e+07	1.97084e+07	1.29491e+07	3.02559e+07	3.99384e+07	3.17591e+07	-11146	33696.2	-22550.2
406.586	474.111	-1792.71	2.72807e+07	1.96396e+07	1.29276e+07	3.03416e+07	3.99106e+07	3.17648e+07	-12211.2	33950.5	-21739.3
474.111	541.7	-1814.22	2.72477e+07	1.95726e+07	1.29081e+07	3.04302e+07	3.98801e+07	3.17771e+07	-13198.8	34242.3	-21043.5
541.7	609.322	-1834.03	2.72115e+07	1.95083e+07	1.28933e+07	3.05203e+07	3.98495e+07	3.1797e+07	-14213.4	34464.9	-20251.6
609.322	676.9	-1852.07	2.71718e+07	1.94465e+07	1.28812e+07	3.06123e+07	3.98178e+07	3.18241e+07	-15197.9	34676	-19478
676.9	744.371	-1868.33	2.71284e+07	1.93876e+07	1.28724e+07	3.07057e+07	3.97859e+07	3.18589e+07	-16180.5	34841.3	-18660.8
744.371	811.66	-1882.79	2.70813e+07	1.93316e+07	1.28659e+07	3.08005e+07	3.97539e+07	3.19012e+07	-17145	34979	-17833.9
811.66	878.693	-1895.41	2.70304e+07	1.92786e+07	1.28618e+07	3.08965e+07	3.9722e+07	3.19514e+07	-18097.6	35076.2	-16978.6
878.693	946.324	-1907.92	2.69755e+07	1.92287e+07	1.28595e+07	3.09935e+07	3.96906e+07	3.20092e+07	-19111	35052.6	-15941.6
946.324	1014.43	-1920.24	2.6923e+07	1.91899e+07	1.28868e+07	3.10729e+07	3.9679e+07	3.20707e+07	-20066.5	35035.5	-14969
1014.43	1082.02	-1930.57	2.68712e+07	1.91545e+07	1.29256e+07	3.11405e+07	3.96766e+07	3.21282e+07	-20949	35043.2	-14094.1
1082.02	1149.02	-1938.94	2.6817e+07	1.91146e+07	1.2954e+07	3.12084e+07	3.96694e+07	3.2181e+07	-21842.2	34975.5	-13133.2
1149.02	1215.34	-1945.29	2.67622e+07	1.90748e+07	1.29837e+07	3.12706e+07	3.96644e+07	3.22289e+07	-22700.3	34886.7	-12186.4
1215.34	1280.9	-1949.61	2.6706e+07	1.90329e+07	1.30089e+07	3.13306e+07	3.96578e+07	3.2272e+07	-23545.3	34745.2	-11199.9
1280.9	1345.62	-1951.88	2.66489e+07	1.89906e+07	1.30332e+07	3.1387e+07	3.96514e+07	3.231e+07	-24364.5	34568.6	-10204.1
1345.62	1409.39	-1952.06	2.65907e+07	1.89473e+07	1.30551e+07	3.14415e+07	3.96444e+07	3.23433e+07	-25162.3	34345.4	-9183.1
1409.39	1472.15	-1950.15	2.65314e+07	1.8904e+07	1.30754e+07	3.14947e+07	3.96372e+07	3.23718e+07	-25935.5	34082.7	-8147.16
1472.15	1533.79	-1946.13	2.64705e+07	1.88609e+07	1.30935e+07	3.15489e+07	3.96301e+07	3.23961e+07	-26683.7	33775.1	-7091.44
1533.79	1577.87	-1909.94	2.64078e+07	1.88182e+07	1.31098e+07	3.16049e+07	3.96228e+07	3.24167e+07	-26131.6	34955.2	-8823.64
1577.87	1604.45	-1843.17	2.63453e+07	1.8781e+07	1.3146e+07	3.16423e+07	3.96204e+07	3.24236e+07	-26320.7	35312.5	-8991.81
1604.45	1628.65	-1776.77	2.62845e+07	1.87444e+07	1.31908e+07	3.16681e+07	3.96178e+07	3.24149e+07	-27551.8	34622.5	-7070.67
1628.65	1648.11	-1711.78	2.62236e+07	1.86782e+07	1.32287e+07	3.16679e+07	3.95886e+07	3.23957e+07	-28517.2	34620.7	-6103.48
1648.11	1659.92	-1651.42	2.61632e+07	1.86222e+07	1.32677e+07	3.1681e+07	3.95667e+07	3.23645e+07	-30135.8	34484.5	-4348.73
1659.92	1663.19	-1596.1	2.61015e+07	1.85605e+07	1.33021e+07	3.16984e+07	3.95381e+07	3.23249e+07	-31496.4	34442.9	-2946.54
1663.19	1660.59	-1543.43	2.60374e+07	1.85002e+07	1.33352e+07	3.17264e+07	3.95073e+07	3.22773e+07	-32472.2	34054.7	-1582.47
1660.59	1654.22	-1491.28	2.59741e+07	1.8462e+07	1.33679e+07	3.17862e+07	3.94868e+07	3.22225e+07	-33200	33593	-393.089
1654.22	1645.09	-1438.71	2.59049e+07	1.84104e+07	1.34019e+07	3.18376e+07	3.94513e+07	3.21605e+07	-33828.3	33027.5	800.797
1645.09	1633.67	-1385.21	2.58326e+07	1.8361e+07	1.34376e+07	3.18965e+07	3.94098e+07	3.20918e+07	-34363.1	32419.2	1943.88
1633.67	1645.46	-1343.95	2.57546e+07	1.83051e+07	1.34756e+07	3.19531e+07	3.93565e+07	3.20164e+07	-33747.3	29407.2	4340.06
1645.46	1679.78	-1314.1	2.56708e+07	1.82267e+07	1.35063e+07	3.2e+07	3.92834e+07	3.19428e+07	-33640.2	27609.8	6030.48
1679.78	1711.76	-1282.11	2.55831e+07	1.81388e+07	1.35349e+07	3.20394e+07	3.9199e+07	3.18705e+07	-34267.1	27448.1	6818.94
1711.76	1741.99	-1248.29	2.54945e+07	1.80603e+07	1.3568e+07	3.20801e+07	3.9112e+07	3.17949e+07	-34438.3	26346.1	8092.22
1741.99	1770.09	-1212.47	2.54035e+07	1.79809e+07	1.36019e+07	3.21172e+07	3.90178e+07	3.1719e+07	-34797.4	25698.9	9098.55
1770.09	1796.19	-1174.77	2.53109e+07	1.79065e+07	1.36384e+07	3.21531e+07	3.89185e+07	3.16412e+07	-34997.4	24754.3	10243.1
1796.19	1820.16	-1135.15	2.52166e+07	1.78339e+07	1.36765e+07	3.21863e+07	3.88129e+07	3.15628e+07	-35225.9	23922	11303.9
1820.16	1841.98	-1093.68	2.51209e+07	1.77649e+07	1.37166e+07	3.22175e+07	3.87016e+07	3.14834e+07	-35380.8	22981.8	12399
1841.98	1861.6	-1050.36	2.50237e+07	1.76987e+07	1.37583e+07	3.22461e+07	3.85842e+07	3.14034e+07	-35517.2	22055.9	13461.3
1861.6	1878.97	-1005.24	2.49254e+07	1.76359e+07	1.38017e+07	3.22723e+07	3.84607e+07	3.13229e+07	-35604.5	21079.6	14524.9
1878.97	1894.06	-958.367	2.48259e+07	1.75761e+07	1.38467e+07	3.22957e+07	3.83312e+07	3.12421e+07	-35659.3	20091.3	15568
1894.06	1913.77	-913.322	2.47253e+07	1.75196e+07	1.38934e+07	3.23162e+07	3.81957e+07	3.11613e+07	-35355.2	18424.4	16930.8
1913.77	1937.8	-870.012	2.46178e+07	1.74339e+07	1.39316e+07	3.23203e+07	3.80538e+07	3.10946e+07	-35183.4	17087.3	18096.1
1937.8	1959.24	-824.969	2.45101e+07	1.73402e+07	1.3965e+07	3.23151e+07	3.79144e+07	3.10387e+07	-35196.6	16187	19009.6
1959.24	1978.23	-778.333	2.4409e+07	1.72632e+07	1.39992e+07	3.23104e+07	3.7781e+07	3.09853e+07	-35048.9	15018.5	20030.4
1978.23	1994.65	-730.114	2.43111e+07	1.7189e+07	1.4031e+07	3.23016e+07	3.76526e+07	3.09389e+07	-34926.3	13964.1	20962.2
1994.65	2008.54	-680.394	2.42183e+07	1.71242e+07	1.40617e+07	3.22914e+07	3.753e+07	3.08968e+07	-34729.6	12821.5	21908.2
2008.54	2019.85	-629.222	2.41295e+07	1.70641e+07	1.40904e+07	3.22786e+07	3.74135e+07	3.08604e+07	-34512.3	11701.7	22810.5
2019.85	2028.59	-576.669	2.40453e+07	1.70103e+07	1.41172e+07	3.22641e+07	3.73032e+07	3.08289e+07	-34246.7	10549	23697.7
2028.59	2034.74	-522.798	2.39651e+07	1.6961e+07	1.41419e+07	3.22476e+07	3.71996e+07	3.08024e+07	-33947.9	9395.36	24552.6
[truncated: 3,103 more rows]
